# Supplementary material
Source: PubMed Central journal article supplement (PMC2896489)
Supplement: NIHMS211088-supplement-1_si_001.pdf [file NIHMS211088-supplement-1_si_001.pdf]

## Supporting Information

# Synthesis of Immunostimulatory $\alpha$ -C-Galactosylceramide Glycolipids via Sonogashira Coupling, Asymmetric Epoxidation, and Trichloroacetimidate-Mediated Epoxide Opening

*Zheng Liu, Hoe-Sup Byun, and Robert Bittman\**

Department of Chemistry and Biochemistry, Queens College of The City University of New York,

Flushing, New York 11367-1597

[Robert.Bittman@qc.cuny.edu](mailto:Robert.Bittman@qc.cuny.edu)

### *Table of Contents*

|                                                               |     |
|---------------------------------------------------------------|-----|
| General Experimental Methods                                  | S4  |
| Experimental Procedures                                       | S4  |
| Preparation of <b>B</b>                                       | S4  |
| Figure S1. Partial $^1\text{H}$ NMR spectra of crude <b>B</b> | S4  |
| Preparation of <b>14a</b>                                     | S5  |
| Preparation of <b>17</b>                                      | S7  |
| Preparation of <b>15</b>                                      | S7  |
| Preparation of <b>13</b>                                      | S8  |
| Preparation of <b>12</b>                                      | S9  |
| Preparation of <b>20</b> and <b>11</b>                        | S9  |
| Preparation of <b>10</b>                                      | S10 |
| Preparation of <b>9</b>                                       | S11 |
| Preparation of <b>7</b>                                       | S12 |

|                                                                                                        |     |
|--------------------------------------------------------------------------------------------------------|-----|
| Preparation of <b>21</b>                                                                               | S13 |
| Preparation of <b>22</b> and <b>24</b>                                                                 | S14 |
| Preparation of <b>2</b>                                                                                | S16 |
| Table S1. Comparison of $^1\text{H}$ and $^{13}\text{C}$ NMR data and $[\alpha]_{\text{D}}^{25}$ value | S17 |
| Preparation of <b>6</b>                                                                                | S18 |
| References                                                                                             | S18 |
| $^1\text{H}$ NMR of crude <b>B</b> (before recrystallization)                                          | S21 |
| $^{13}\text{C}$ NMR of crude <b>B</b> (before recrystallization)                                       | S22 |
| $^1\text{H}$ NMR of <b>B</b>                                                                           | S23 |
| $^{13}\text{C}$ NMR of <b>B</b>                                                                        | S24 |
| $^1\text{H}$ NMR of <b>14a</b>                                                                         | S25 |
| $^{13}\text{C}$ NMR of <b>14a</b>                                                                      | S26 |
| $^1\text{H}$ NMR of <b>18</b>                                                                          | S27 |
| $^{13}\text{C}$ NMR of <b>18</b>                                                                       | S28 |
| $^1\text{H}$ NMR of <b>15</b>                                                                          | S29 |
| $^{13}\text{C}$ NMR of <b>15</b>                                                                       | S30 |
| $^1\text{H}$ NMR of <b>13</b>                                                                          | S31 |
| $^{13}\text{C}$ NMR of <b>13</b>                                                                       | S32 |
| $^1\text{H}$ NMR of <b>12</b>                                                                          | S33 |
| $^{13}\text{C}$ NMR of <b>12</b>                                                                       | S34 |
| $^1\text{H}$ NMR of <b>20</b>                                                                          | S35 |
| $^{13}\text{C}$ NMR of <b>20</b>                                                                       | S36 |
| $^1\text{H}$ NMR of <b>11</b>                                                                          | S37 |
| $^{13}\text{C}$ NMR of <b>11</b>                                                                       | S38 |
| $^1\text{H}$ NMR of <b>10</b>                                                                          | S39 |
| $^{13}\text{C}$ NMR of <b>10</b>                                                                       | S40 |
| $^1\text{H}$ NMR of <b>9</b>                                                                           | S41 |
| $^{13}\text{C}$ NMR of <b>9</b>                                                                        | S42 |
| $^1\text{H}$ NMR of <b>7</b>                                                                           | S43 |

|                                                           |     |
|-----------------------------------------------------------|-----|
| <sup>13</sup> C NMR of <b>7</b>                           | S44 |
| DEPT 135 of <b>7</b>                                      | S45 |
| HMQC of <b>7</b>                                          | S46 |
| COSY of <b>7</b>                                          | S47 |
| <sup>1</sup> H NMR of ( <i>S</i> )-MTPA Ester of <b>7</b> | S48 |
| <sup>1</sup> H NMR of <b>21</b>                           | S49 |
| <sup>13</sup> C NMR of <b>21</b>                          | S50 |
| COSY of <b>21</b>                                         | S51 |
| <sup>1</sup> H NMR of <b>22</b>                           | S52 |
| <sup>13</sup> C NMR of <b>22</b>                          | S53 |
| COSY of <b>22</b>                                         | S54 |
| DEPT 135 of <b>22</b>                                     | S55 |
| HMQC of <b>22</b>                                         | S56 |
| <sup>1</sup> H NMR of <b>24</b>                           | S57 |
| COSY of <b>24</b>                                         | S58 |
| <sup>13</sup> C NMR of <b>24</b>                          | S59 |
| <sup>1</sup> H NMR of <b>2</b>                            | S60 |
| <sup>13</sup> C NMR of <b>2</b>                           | S61 |
| <sup>1</sup> H NMR of <b>6</b>                            | S62 |
| COSY of <b>6</b>                                          | S63 |
| <sup>13</sup> C NMR of <b>6</b>                           | S64 |
| DEPT 135 of <b>6</b>                                      | S65 |

## General Experimental Information

All reactions were carried out under a dry nitrogen atmosphere using oven-dried glassware and magnetic stirring. The solvents were dried as follows: THF was heated at reflux over sodium benzophenone ketyl; toluene was heated at reflux over sodium; CH<sub>2</sub>Cl<sub>2</sub> were dried over CaH<sub>2</sub>. Anhydrous *i*Pr<sub>2</sub>NEt, CH<sub>3</sub>CN, Et<sub>3</sub>N, and benzene were used directly as purchased. Silica gel 60 F254 aluminum TLC plates of 0.2 mm thickness were used to monitor the reactions. The spots were visualized with short wavelength ultraviolet light or by charring after spraying with 15% H<sub>2</sub>SO<sub>4</sub>. Flash chromatography was carried out with silica gel 60 (230-400 ASTM mesh). <sup>1</sup>H NMR spectra were obtained on 400 MHz or 500 MHz spectrometers. Chemical shifts were referenced on residual solvent peaks: CDCl<sub>3</sub> ( $\delta$  = 7.26 ppm for <sup>1</sup>H NMR and 77.00 ppm for <sup>13</sup>C NMR). Optical rotations were measured at rt in a 1.0-dm cell. High-resolution mass spectra were acquired by electrospray ionization.

## Experimental Procedures

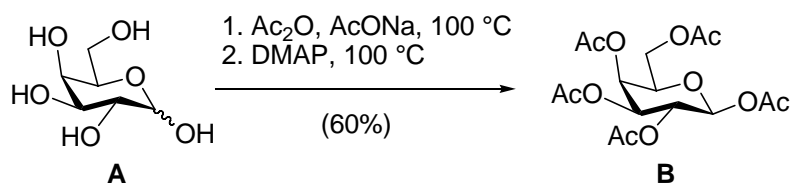

**Compound B.**<sup>S1, S2</sup> A mixture of D-galactose (18.1 g, 0.10 mol) and sodium acetate (825 mg, 10.0 mmol) in 50 mL (0.528 mol) of Ac<sub>2</sub>O was heated overnight at 100 °C (oil bath temperature). At this point, TLC showed the incomplete consumption of **A**. After addition of a catalytic amount of DMAP (1.22 g, 10.0 mmol), the mixture was stirred at same temperature and **A** was completely consumed overnight. The reaction mixture was diluted with EtOAc (250 mL) and washed with brine and then with water. The organic layer was dried over Na<sub>2</sub>SO<sub>4</sub> and concentrated to give 39.21 g (100%) of an  $\alpha$ - and  $\beta$ -mixture of D-galactopyranose pentaacetate and D-galactofuranose pentaacetate (see Figure S1). The product was purified by recrystallization from hexane/EtOAc (2:1) to give  $\beta$ -D-galactopyranose pentaacetate **B** (23.5 g, 60%):  $[\alpha]_D^{23.5} +27.1$  (*c* 1.03, CHCl<sub>3</sub>) [lit.<sup>S1h</sup>  $[\alpha]_D^{20} +25$  (CHCl<sub>3</sub>); lit.<sup>S1i</sup>  $[\alpha]_D^{20}$

+25.2 (CHCl<sub>3</sub>); <sup>1</sup>H NMR (400 MHz, CDCl<sub>3</sub>) δ 2.00 (s, 3H), 2.05 (s, 6H), 2.13 (s, 3H), 2.17 (s, 3H), 4.03-4.21 (m, 3H), 5.09 (dd, *J* = 3.4, 10.4 Hz, 1H), 5.30-5.37 (m, 1H), 5.43 (d, *J* = 2.4 Hz, 1H), 5.71 (d, *J* = 8.3 Hz, 1H); <sup>13</sup>C NMR (100 MHz, CDCl<sub>3</sub>) δ 20.48, 20.57, 20.59, 20.75, 61.0, 66.7, 67.7, 70.8, 71.6, 92.1, 168.9, 169.3, 169.9, 170.1, 170.3.

**Figure S1.** Partial <sup>1</sup>H NMR spectra of crude **B**. The signals of the anomeric protons of **B** and the other three isomers (α-D-galactopyranose and α- and β-D-galactofuranose pentaacetates) are shown.

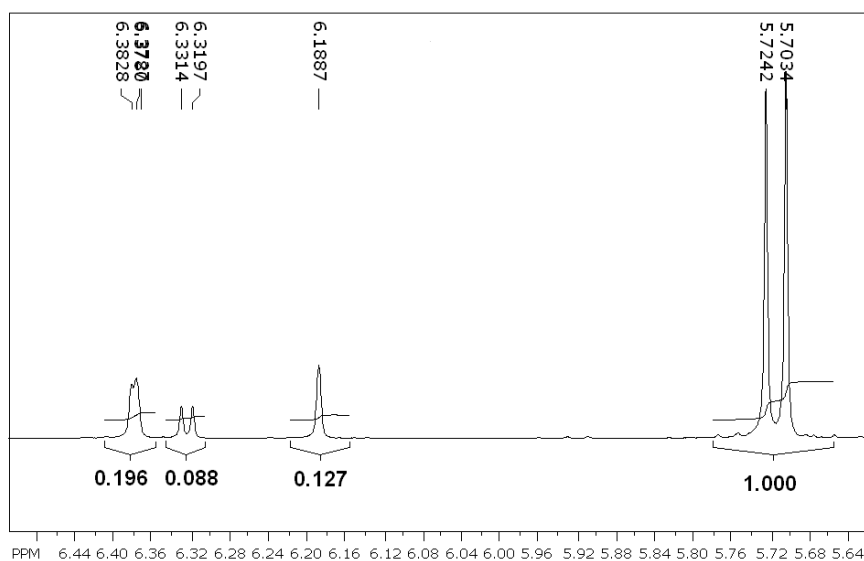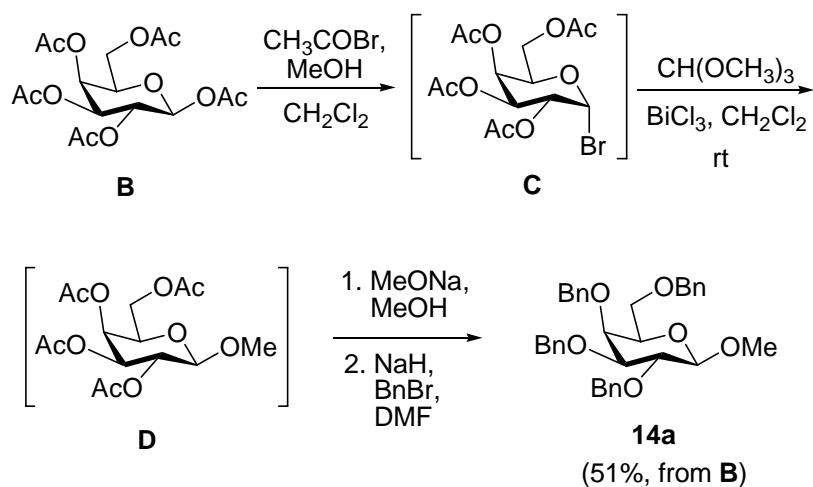

**Compound 14a.** To a solution of **B** (19.6 g, 50.2 mmol) in 50 mL of CH<sub>2</sub>Cl<sub>2</sub> were added acetyl bromide (12 mL, 162 mmol) and MeOH (3.0 mL, 74.1 mmol) at 0 °C. After all of the starting pentaacetate was consumed, the mixture was concentrated to give crude α-D-galactosyl bromide **C**,<sup>S3</sup>

which was dried under high vacuum overnight. To a stirred solution of **C** and trimethyl orthoformate (10.0 mL, 91.4 mmol) in 50 mL of CH<sub>2</sub>Cl<sub>2</sub> was added BiCl<sub>3</sub> (3.16 g, 10.0 mmol) at rt.<sup>S4</sup> After 5 h, the reaction mixture was diluted with CH<sub>2</sub>Cl<sub>2</sub> (100 mL), and washed successively with saturated aqueous NaHCO<sub>3</sub> solution and water. After the organic layer was dried (Na<sub>2</sub>SO<sub>4</sub>) and concentrated, the residue was dried further under vacuum. The crude tetraacetate product **D**<sup>S5</sup> was dissolved in 100 mL of anhydrous MeOH and treated with MeONa (5 mL, 30% in MeOH) under reduced pressure in order to remove the methyl acetate formed. After **D** was dried under vacuum, *O*-benzylation was carried out using NaH (10.1 g, 252 mmol; 60% in white oil) and benzyl bromide (30 mL, 252 mmol) in 50 mL of DMF. The product was purified by column chromatography on silica gel (hexane/EtOAc 10:1 to 6:1) followed by recrystallization from hexane/EtOAc to give methyl 2,3,4,6-tetra-*O*-benzyl-β-D-galactopyranoside **14a**:<sup>S6</sup> (14.2 g, 51% overall yield): [α]<sup>24.2</sup><sub>D</sub> -2.4 (*c* 1.08, CHCl<sub>3</sub>) [lit.<sup>S6b</sup> [α]<sup>26.6</sup><sub>D</sub> -0.84 (*c* 0.7, CHCl<sub>3</sub>)]; <sup>1</sup>H NMR (400 MHz, CDCl<sub>3</sub>) δ 3.49-3.56 (m, 2H), 3.54 (s, 3H), 3.38-3.60 (m, 2H), 3.80 (dd, 1H, *J* = 2.32, 7.8 Hz), 3.89 (d, 1H, *J* = 2.32), 4.27 (d, 1H, *J* = 7.68 Hz), 4.40 (d, 1H, *J* = 19.2 Hz), 4.45 (d, 1H, *J* = 11.7 Hz), 4.61 (d, 1H, *J* = 11.7 Hz), 4.68-4.77 (m, 3H), 4.89 (d, 1H, *J* = 10.9 Hz), 4.94 (d, 1H, *J* = 11.7 Hz), 7.22-7.37 (m, 20H); <sup>13</sup>C NMR (100 MHz, CDCl<sub>3</sub>) δ 57.0, 68.8, 72.9, 73.27, 73.5, 74.4, 75.1, 79.6, 82.1, 105.0, 127.47, 127.50, 127.7, 127.8, 127.9, 128.07, 128.10, 128.22, 128.25, 128.30, 128.4, 137.9, 138.4, 138.6, 138.7.

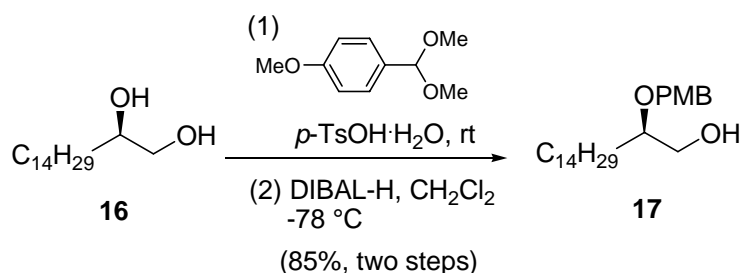

**Compound 17.** A solution of diol **16** (24.6 g, 95.2 mmol) in benzene (300 mL) was treated with *p*-methoxybenzaldehyde dimethylacetal (37.8 mL, 190 mmol) and *p*-toluenesulfonic acid monohydrate

(1.8 g, 9.5 mmol). The reaction mixture was stirred at rt overnight and then concentrated. The residue was used without purification in the next step. The crude acetonide (maximum 95.2 mmol) was dissolved in CH<sub>2</sub>Cl<sub>2</sub> (500 mL), cooled to -78 °C, and treated with DIBAL-H (1.0 M in hexane; 333 mL, 333 mmol). After 30 min, the reaction mixture was gradually warmed to rt, quenched with MeOH (10 mL), diluted with Et<sub>2</sub>O (700 mL), and treated with a saturated solution of Rochelle's salt (500 mL). The resultant biphasic mixture was stirred vigorously at rt until the organic phase turned clear. The organic phase was then dried with MgSO<sub>4</sub>, filtered through Na<sub>2</sub>SO<sub>4</sub>, and concentrated. Flash chromatography (hexane/EtOAc 3:1) afforded **17** (30.6 g, 85% yield for two steps): <sup>1</sup>H NMR (500 MHz, CDCl<sub>3</sub>) δ 0.88 (t, *J* = 7.1 Hz, 3H), 1.20-1.40 (m, 24H), 1.43-1.52 (m, 1H), 1.57-1.66 (m, 1H), 2.02 (brs, 1H), 3.45-3.53 (m, 2H), 3.64-3.70 (m, 1H), 3.80 (s, 3H), 4.46 (d, *J* = 11.2 Hz, 1H), 4.56 (d, *J* = 11.2 Hz, 1H), 6.87-6.91 (m, 2H), 7.26-7.29 (m, 2H); <sup>13</sup>C NMR (125 MHz, CDCl<sub>3</sub>) δ 14.1, 22.7, 25.4, 29.3, 29.54, 29.58, 29.63, 29.66, 29.68, 29.8, 30.8, 31.9, 55.2, 64.2, 71.1, 79.4, 113.8, 129.4, 130.5, 159.2; HRMS (ESI, MNa<sup>+</sup>) *m/z* calcd for C<sub>24</sub>H<sub>42</sub>NaO<sub>3</sub><sup>+</sup> 401.3026, found 401.3023.

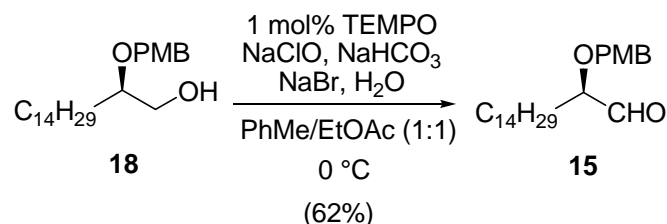

**Compound 15.** To a solution of 19 g (50.2 mmol) of alcohol **18** in 400 mL of EtOAc/PhMe (1:1) were added a solution of NaBr (10.8 g, 105 mmol in 50 mL H<sub>2</sub>O) and TEMPO (235 mg, 1.51 mmol) at 0 °C. Clorox (76 mL) was diluted to 190 mL with H<sub>2</sub>O and buffered by the addition of NaHCO<sub>3</sub> (12.3 g, 146 mmol). The bleach solution was added dropwise to the reaction flask over 1 h and stirred for an additional 10 min at 0 °C. The ice bath was removed, the reaction mixture was diluted with 800 mL of EtOAc, and the layers were separated. The organic layer was washed with saturated aqueous NaHCO<sub>3</sub> solution and brine, dried over Na<sub>2</sub>SO<sub>4</sub>, filtered, and concentrated. The residue was purified by flash

chromatography (hexanes/EtOAc 20:1) to yield **15** (11.8 g, 62%):  $^1\text{H NMR}$  (500 MHz,  $\text{CDCl}_3$ )  $\delta$  0.88 (t,  $J = 7.1$  Hz, 3H), 1.20-1.46 (m, 24H), 1.61-1.68 (m, 2H), 3.70-3.75 (m, 1H), 3.81 (s, 3H), 4.48 (d,  $J = 11.4$  Hz, 1H), 4.59 (d,  $J = 11.2$  Hz, 1H), 6.86-6.91 (m, 2H), 7.25-7.30 (m, 2H), 9.61 (d,  $J = 2.2$  Hz, 1H);  $^{13}\text{C NMR}$  (125 MHz,  $\text{CDCl}_3$ )  $\delta$  14.1, 22.7, 24.7, 29.34, 29.37, 29.51, 29.59, 29.63, 29.65, 29.66, 30.0, 31.9, 55.2, 72.2, 83.1, 113.8, 129.3, 129.7, 159.4, 204.2; **HRMS** (ESI,  $\text{MNH}_4^+$ )  $m/z$  calcd for  $\text{C}_{24}\text{H}_{44}\text{NO}_3^+$  394.3316, found 394.3302.

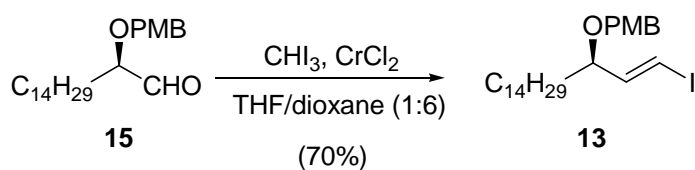

**Compound 13.** To a slurry of anhydrous chromium(II) chloride (27.5 g, 224 mmol) in THF (60 mL) was added a solution containing **15** (8.40 g, 22.3 mmol) and iodoform (26.3 g, 66.9 mmol) in dioxane (360 mL). The resulting brown suspension was stirred at rt overnight, and then was diluted with  $\text{Et}_2\text{O}$  (600 mL) and poured into 200 mL of water. The aqueous phase was extracted with  $\text{Et}_2\text{O}$ . The combined organic layers were washed with brine, dried over  $\text{MgSO}_4$ , filtered, and concentrated. Purification of the crude product by flash chromatography (hexanes/EtOAc 40:1) afforded iodide **13** (7.81 g, 70%):  $^1\text{H NMR}$  (500 MHz,  $\text{CDCl}_3$ )  $\delta$  0.88 (t,  $J = 7.1$  Hz, 3H), 1.17-1.40 (m, 24H), 1.42-1.51 (m, 1H), 1.55-1.65 (m, 1H), 3.66-3.72 (m, 1H), 3.79 (s, 3H), 4.27 (d,  $J = 11.4$  Hz, 1H), 4.51 (d,  $J = 11.2$  Hz, 1H), 6.26 (d,  $J = 14.6$  Hz, 1H), 6.45 (dd,  $J = 7.8, 14.6$  Hz, 1H), 6.85-6.89 (m, 2H), 7.21-7.25 (m, 2H);  $^{13}\text{C NMR}$  (125 MHz,  $\text{CDCl}_3$ )  $\delta$  14.1, 22.7, 25.1, 29.3, 29.40, 29.49, 29.56, 29.61, 29.63, 29.66, 31.9, 34.9, 55.2, 70.0, 77.8, 81.0, 113.7, 129.3, 130.2, 147.2, 159.1; **HRMS** (ESI,  $\text{MNa}^+$ )  $m/z$  calcd for  $\text{C}_{25}\text{H}_{41}\text{INaO}_2^+$  523.2043, found 523.2042.

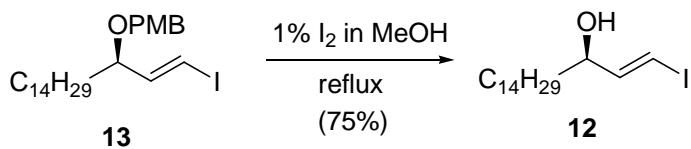



**Compound 12.** A solution of **13** (8.00 g, 16.0 mmol) in 200 mL of 1% I<sub>2</sub>/MeOH (w/v) was heated at reflux for 2 h. After the reaction mixture was concentrated under reduced pressure, the residue was dissolved in EtOAc (200 mL) and washed with saturated aqueous Na<sub>2</sub>S<sub>2</sub>O<sub>3</sub> solution (50 mL). The organic layer was dried (Na<sub>2</sub>SO<sub>4</sub>) and concentrated. The residue was purified by column chromatography (hexanes/EtOAc 10:1) to give **12** (4.56 g, 75%): <sup>1</sup>H NMR (500 MHz, CDCl<sub>3</sub>) δ 0.88 (t, *J* = 7.1 Hz, 3H), 1.20-1.40 (m, 24H), 1.49-1.57 (m, 2H), 4.07-4.13 (m, 1H), 6.35 (dd, *J* = 1.1, 14.4 Hz, 1H), 6.58 (dd, *J* = 6.4, 14.4 Hz, 1H); <sup>13</sup>C NMR (125 MHz, CDCl<sub>3</sub>) δ 14.1, 22.7, 25.1, 29.35, 29.42, 29.51, 29.55, 29.62, 29.64, 29.67, 31.9, 36.6, 74.7, 77.1, 148.7; HRMS (ESI, MNa<sup>+</sup>) *m/z* calcd for C<sub>17</sub>H<sub>33</sub>INaO<sup>+</sup> 403.1468, found 403.1460.

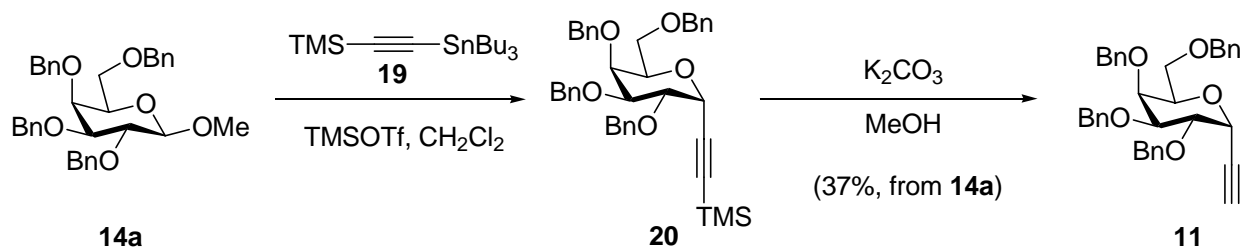

**Compound 11.**<sup>S7</sup> To a solution of **14a** (3.52 g, 6.35 mmol) in CH<sub>2</sub>Cl<sub>2</sub> (100 mL) were added tributylstannyl(trimethylsilyl)ethyne **19** (5.49 g, 14.2 mmol) and TMSOTf (2.30 mL, 12.7 mmol) at rt. After the reaction mixture was stirred at rt for 2 h, the reaction was quenched with saturated aqueous NaHCO<sub>3</sub> solution (30 mL). The product was extracted with EtOAc (3×100 mL). The combined organic extracts were washed with H<sub>2</sub>O (100 mL) and brine (100 mL), dried over Na<sub>2</sub>SO<sub>4</sub>, and concentrated. The residue was purified by flash chromatography (hexanes/EtOAc 20:1) to afford **20** (2.02 g, 3.25 mmol) containing a small amount of stannane. The crude product was dissolved in MeOH (100 mL) and treated with K<sub>2</sub>CO<sub>3</sub> (2.0 g) at rt for 4 h. The reaction was quenched with saturated aqueous NH<sub>4</sub>Cl solution (30 mL), and extracted with EtOAc (3×100 mL). The combined organic extracts were washed with H<sub>2</sub>O and brine, dried over Na<sub>2</sub>SO<sub>4</sub>, and concentrated. The residue was purified by flash column chromatography (hexanes/EtOAc 8:1) to afford α-C-ethynylgalactose **11** (1.30 g, 37% two steps): <sup>1</sup>H NMR (500 MHz, CDCl<sub>3</sub>) δ 2.53 (d, *J* = 2.3 Hz, 1H), 3.48-3.56 (m, 2H), 3.89 (dd,

$J = 2.8, 9.9$  Hz, 1H), 3.97-3.99 (m, 1H), 4.07-4.15 (m, 2H), 4.40 (d,  $J = 11.7$  Hz, 1H), 4.48 (d,  $J = 11.7$  Hz, 1H), 4.57 (d,  $J = 11.3$  Hz, 1H), 4.71-4.81 (m, 4H), 4.86 (d,  $J = 11.7$  Hz, 1H), 4.94 (d,  $J = 11.3$  Hz, 1H), 7.23-7.41 (m, 20H);  $^{13}\text{C}$  NMR (100 MHz,  $\text{CDCl}_3$ )  $\delta$  67.3, 68.7, 72.6, 73.2, 73.3, 73.5, 74.8, 74.9, 75.1, 76.3, 78.9, 80.2, 127.4, 127.5, 127.6, 127.7, 127.9, 128.22, 128.27, 128.35, 128.36, 128.38, 137.9, 138.2, 138.5, 138.7.

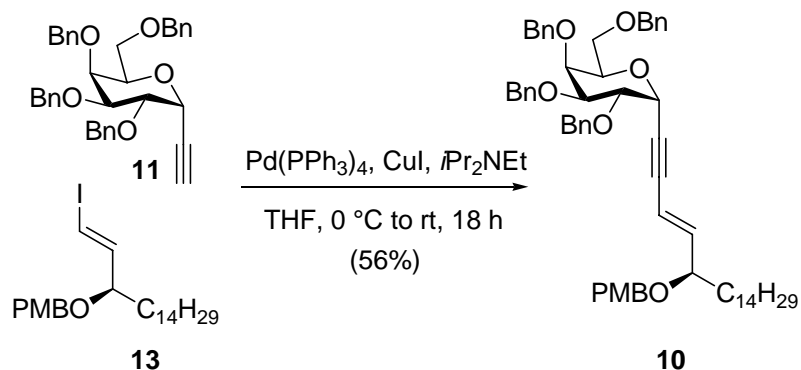

**Compound 10.** Compounds **11** (150 mg, 0.273 mmol) and **13** (164 mg, 0.328 mmol) were dissolved in THF (5 mL). The solution was degassed by two freeze-pump-thaw cycles.  $\text{Pd(PPh}_3)_4$  (31 mg, 27.3  $\mu\text{mol}$ ) and CuI (25 mg, 0.131 mmol) were added, and the mixture was degassed by one freeze-pump-thaw cycle, placed in a 0  $^\circ\text{C}$  bath under  $\text{N}_2$ , and treated with  $i\text{Pr}_2\text{NEt}$  (285  $\mu\text{L}$ , 1.64 mmol). The reaction was stirred at rt for 18 h, and then was quenched by the addition of half-saturated aqueous  $\text{NH}_4\text{Cl}$  solution and the mixture was extracted twice with  $\text{Et}_2\text{O}$ . The combined organic extracts were dried ( $\text{Na}_2\text{SO}_4$ ) and concentrated. The residue was purified by flash chromatography (hexanes/ $\text{EtOAc}$  8:1) to afford **10** (140 mg, 56%):  $^1\text{H}$  NMR (500 MHz,  $\text{CDCl}_3$ )  $\delta$  0.88 (t,  $J = 7.1$  Hz, 3H), 1.20-1.41 (m, 24H), 1.45-1.53 (m, 1H), 1.58-1.66 (m, 1H), 3.54-3.57 (m, 2H), 3.72-3.77 (m, 1H), 3.78 (s, 3H), 3.89 (dd,  $J = 2.7, 9.9$  Hz, 1H), 3.98-4.01 (m, 1H), 4.09-4.16 (m, 2H), 4.27 (d,  $J = 11.5$  Hz, 1H), 4.40 (d,  $J = 11.7$  Hz, 1H), 4.48 (d,  $J = 11.7$  Hz, 1H), 4.53 (d,  $J = 11.3$  Hz, 1H), 4.57 (d,  $J = 11.3$  Hz, 1H), 4.71-4.80 (m, 3H), 4.84 (d,  $J = 11.7$  Hz, 1H), 4.94 (d,  $J = 11.5$  Hz, 1H), 4.96 (dd,  $J = 1.6, 5.7$  Hz, 1H), 5.71 (d,  $J = 16.0$  Hz, 1H), 6.07 (dd,  $J = 7.4, 16.0$  Hz, 1H), 6.85-6.89 (m, 2H), 7.21-7.40 (m, 22H);  $^{13}\text{C}$  NMR (100 MHz,  $\text{CDCl}_3$ )  $\delta$  14.1, 22.6, 25.3, 29.3, 29.49, 29.52, 29.60, 29.64, 31.9, 35.3, 55.2, 67.8, 68.6, 70.1,

72.5, 72.9, 73.0, 73.4, 74.7, 74.8, 75.5, 78.8, 80.0, 84.7, 86.0, 110.8, 113.7, 127.4, 127.51, 127.59, 127.71, 127.78, 127.9, 128.15, 128.19, 128.25, 128.30, 128.34, 129.3, 130.5, 137.8, 138.3, 138.5, 138.6, 145.2, 159.1; **HRMS** (ESI,  $MNa^+$ )  $m/z$  calcd for  $C_{61}H_{76}NaO_7^+$  943.5483, found 943.5488.

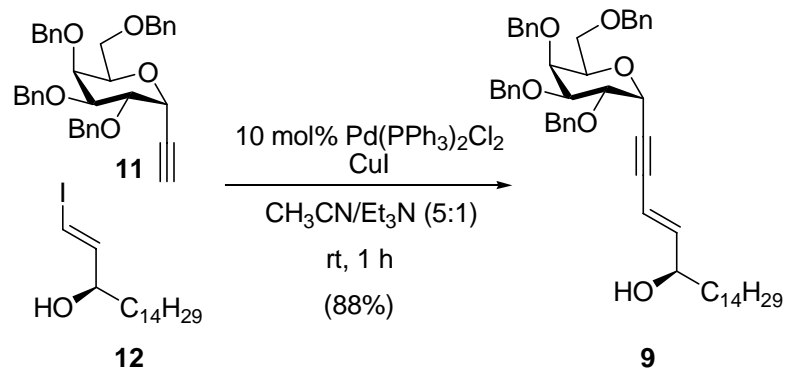

**Compound 9.** A mixture of **11** (870 mg, 1.59 mmol) and **12** (724 mg, 1.90 mmol) was azeotropically dried under reduced pressure with toluene, and then was dissolved in  $CH_3CN/Et_3N$  (30 mL, 5:1). The solution was degassed by two freeze-pump-thaw cycles. After  $PdCl_2(PPh_3)_2$  (112 mg, 0.16 mmol) and  $CuI$  (182 mg, 0.954 mmol) were added, the reaction mixture was stirred at rt for 1 h, quenched with 0.05 M phosphate buffer (pH 7, 140 mL), and poured into water (250 mL). The product was extracted with  $EtOAc$  ( $3 \times 200$  mL). The combined organic layers were dried ( $Na_2SO_4$ ), and concentrated. Purification by flash chromatography (hexanes/ $EtOAc$  5:1) gave **9** (1.12 g, 88%):  **$^1H$  NMR** (500 MHz,  $CDCl_3$ )  $\delta$  0.88 (t,  $J = 7.1$  Hz, 3H), 1.18-1.62 (m, 26H), 3.50-3.56 (m, 2H), 3.86 (dd,  $J = 2.8, 9.8$  Hz, 1H), 3.96-4.00 (m, 1H), 4.08-4.12 (m, 2H), 4.13-4.19 (m, 1H), 4.39 (d,  $J = 11.7$  Hz, 1H), 4.48 (d,  $J = 11.7$  Hz, 1H), 4.57 (d,  $J = 11.4$  Hz, 1H), 4.70-4.78 (m, 3H), 4.83 (d,  $J = 11.7$  Hz, 1H), 4.91-4.95 (m, 2H), 5.75 (dt,  $J = 15.9, 1.5$  Hz, 1H), 6.16 (dd,  $J = 6.1, 15.9$  Hz, 1H), 7.22-7.40 (m, 20H);  **$^{13}C$  NMR** (100 MHz,  $CDCl_3$ )  $\delta$  14.1, 22.7, 25.3, 29.4, 29.53, 29.56, 29.62, 29.65, 29.69, 31.9, 36.9, 67.8, 68.7, 72.3, 72.5, 73.0, 73.1, 73.5, 74.7, 74.9, 75.5, 80.0, 84.9, 86.1, 109.2, 127.46, 127.56, 127.62, 127.75, 127.82, 127.9, 128.20, 128.26, 128.30, 128.31, 128.39, 137.9, 138.4, 138.6, 138.7, 146.7; **HRMS** (ESI,  $MNH_4^+$ )  $m/z$  calcd for  $C_{53}H_{72}NO_6^+$  818.5354, found 818.5351.

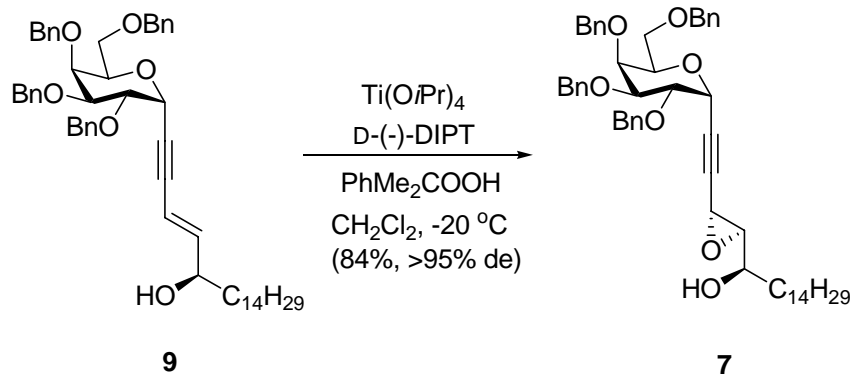

**Compound 7.**  $\text{Ti(OiPr)}_4$  (887 mg, 3.12 mmol) was added dropwise to a solution of D-(-)-DIPT (761 mg, 3.25 mmol) and 4 Å molecular sieves (1.0 g) in  $\text{CH}_2\text{Cl}_2$  (30 mL) at  $-20\text{ }^\circ\text{C}$ . After the resultant mixture was allowed to stir at  $-20\text{ }^\circ\text{C}$  for 50 min, a solution of **9** (1.0 g, 1.25 mmol) in  $\text{CH}_2\text{Cl}_2$  (10 mL) was added over a period of 15 min. The reaction mixture was allowed to stir at  $-20\text{ }^\circ\text{C}$  for another 30 min, and cumene hydroperoxide (924  $\mu\text{L}$ , 5.00 mmol, 80% technical grade) was added via syringe. The reaction mixture was stirred at  $-20\text{ }^\circ\text{C}$  for an additional 48 h, and 10% aqueous D-tartaric acid (5 mL) was added. The reaction mixture was stirred vigorously at rt for 30 min and filtered through a plug of Celite. The filtrate layers were separated and the aqueous layer was further extracted with  $\text{CH}_2\text{Cl}_2$  (3  $\times$  10 mL). The combined organic phases were dried over  $\text{Na}_2\text{SO}_4$  and concentrated. Purification of the residue by flash chromatography (hexane/EtOAc 5:1) afforded epoxide **7** (863 mg, 84%, >95% de; the chiral purity of **7** was determined by analysis of its (*S*)-MTPA ester, see  $^1\text{H}$  NMR of its (*S*)-MTPA ester, p. S48):  $^1\text{H}$  NMR (500 MHz,  $\text{CDCl}_3$ )  $\delta$  0.88 (t,  $J = 7.1$  Hz, 3H), 1.20-1.62 (m, 26H), 1.85 (d,  $J = 2.5$  Hz, 1H), 3.15 (t,  $J = 2.5$  Hz, 1H), 3.47-3.56 (m, 3H), 3.78-3.82 (m, 1H), 3.84 (dd,  $J = 2.8, 9.8$  Hz, 1H), 3.95-3.98 (m, 1H), 4.03-4.11 (m, 2H), 4.39 (d,  $J = 11.7$  Hz, 1H), 4.47 (d,  $J = 11.7$  Hz, 1H), 4.55 (d,  $J = 11.4$  Hz, 1H), 4.69 (d,  $J = 12.0$  Hz, 1H), 4.73 (d,  $J = 7.6$  Hz, 1H), 4.76 (d,  $J = 7.8$  Hz, 1H), 4.80-4.85 (m, 2H), 4.91 (d,  $J = 11.3$  Hz, 1H), 7.21-7.39 (m, 20H);  $^{13}\text{C}$  NMR (100 MHz,  $\text{CDCl}_3$ )  $\delta$  14.1, 22.6, 25.2, 29.3, 29.49, 29.57, 29.60, 29.64, 31.9, 33.1, 34.5, 41.6, 41.8, 62.4, 67.3, 67.9, 68.5, 72.7, 73.0, 73.4, 74.4, 74.5, 74.8, 75.2, 79.4, 79.9, 84.3, 126.0, 127.42, 127.45, 127.54, 127.6, 127.70, 127.74, 127.9, 128.0,

128.16, 128.20, 128.27, 128.3, 128.7, 128.9, 137.8, 138.2, 138.4, 138.5; **HRMS** (ESI,  $\text{MNH}_4^+$ )  $m/z$  calcd for  $\text{C}_{53}\text{H}_{72}\text{NO}_7^+$  834.5303, found 834.5293.

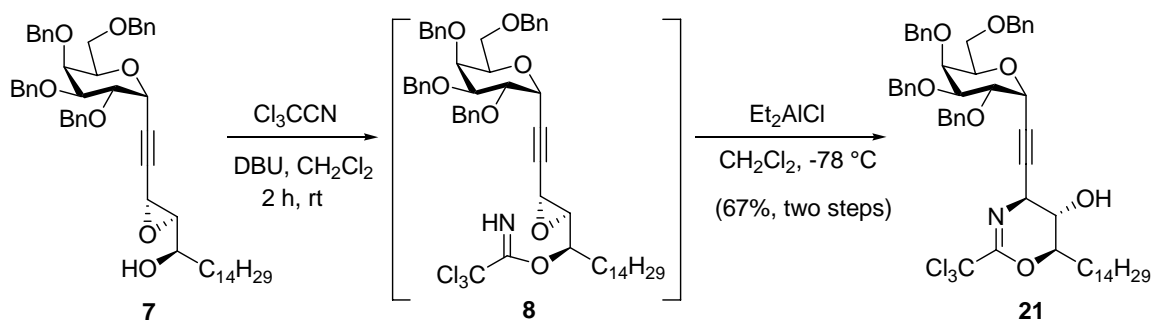

**Compound 21.** To a solution of **7** (425 mg, 0.52 mmol) in dry  $\text{CH}_2\text{Cl}_2$  (10 mL) were added  $\text{DBU}$  (272  $\mu\text{L}$ , 1.82 mmol) and  $\text{Cl}_3\text{CCN}$  (313  $\mu\text{L}$ , 3.12 mmol). The reaction mixture was stirred at rt for 2 h, and then was quenched with saturated aqueous  $\text{NH}_4\text{Cl}$  solution (10 mL) and extracted with  $\text{CH}_2\text{Cl}_2$  ( $3 \times 10$  mL). The combined organic extracts were washed with saturated aqueous  $\text{NH}_4\text{Cl}$  solution, dried ( $\text{Na}_2\text{SO}_4$ ), and concentrated. The residue was dissolved in  $\text{Et}_2\text{O}$  and passed through a short column packed with anhydrous  $\text{Na}_2\text{SO}_4$  and silica gel.  $\text{Et}_2\text{O}$  was evaporated to yield imidate **8** (403 mg) as a light yellow oil, which was dried under high vacuum overnight and used in the next reaction without further purification. To a solution of **8** in  $\text{CH}_2\text{Cl}_2$  (10 mL) was added  $\text{Et}_2\text{AlCl}$  (1.0 M in hexane, 2.08 mL, 2.08 mmol) at  $-78^\circ\text{C}$ . After being stirred at  $-78^\circ\text{C}$  for 24 h, the reaction mixture was diluted with saturated aqueous  $\text{NaHCO}_3$  solution and the product was extracted with  $\text{CH}_2\text{Cl}_2$  ( $3 \times 10$  mL). The combined organic extracts were dried ( $\text{Na}_2\text{SO}_4$ ) and concentrated. Purification of the residue by flash chromatography (hexane/ $\text{EtOAc}$  4:1) afforded dihydrooxazine **21** (333 mg, 67%):  $^1\text{H NMR}$  (500 MHz,  $\text{CDCl}_3$ )  $\delta$  0.88 (t,  $J = 7.1$  Hz, 3H), 1.20-1.64 (m, 25H), 1.85-1.94 (m, 1H), 3.29 (d,  $J = 3.8$  Hz, 1H), 3.39-3.47 (m, 2H), 3.53 (dd,  $J = 6.2, 9.4$  Hz, 1H), 3.82 (dd,  $J = 2.8, 9.8$  Hz, 1H), 3.91-3.95 (m, 1H), 4.03-4.14 (m, 3H), 4.27 (dd,  $J = 2.3, 8.4$  Hz, 1H), 4.38 (d,  $J = 11.5$  Hz, 1H), 4.47 (d,  $J = 11.5$  Hz, 1H), 4.58 (d,  $J = 11.5$  Hz, 1H), 4.68-4.80 (m, 4H), 4.85 (dd,  $J = 2.3, 5.8$  Hz, 1H), 4.92 (d,  $J = 11.5$  Hz, 1H), 7.23-7.40 (m, 20H);  $^{13}\text{C NMR}$  (125 MHz,  $\text{CDCl}_3$ )  $\delta$  14.1, 22.7, 24.0, 29.27, 29.34, 29.46, 29.55, 29.63,

29.67, 31.4, 31.9, 53.5, 67.3, 68.9, 69.0, 72.75, 72.80, 73.3, 73.6, 74.3, 74.7, 75.4, 79.7, 80.1, 80.8, 86.0, 91.6, 127.5, 127.63, 127.69, 127.87, 127.96, 128.1, 128.2, 128.33, 128.39, 128.40, 128.43, 128.9, 137.6, 137.9, 138.3, 138.4, 153.8; **HRMS** (ESI,  $MH^+$ )  $m/z$  calcd for  $C_{55}H_{69}Cl_3NO_7^+$  960.4134, found 960.4130.

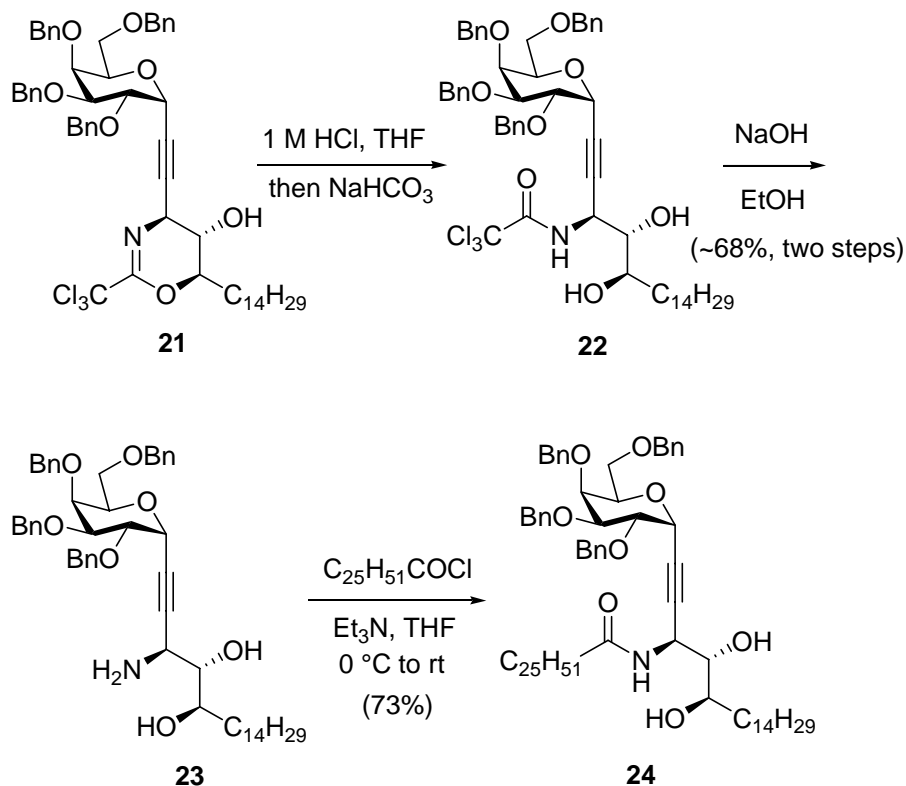

**Compound 24.** To a solution of **21** (333 mg, 0.346 mmol) in THF (15 mL) was added 1 M HCl (5 mL). After being stirred at rt for 30 min, the reaction mixture was carefully basified with saturated aqueous  $\text{NaHCO}_3$  solution (5 mL). The product was extracted with  $\text{CH}_2\text{Cl}_2$  ( $3 \times 50$  mL). The combined organic extracts were dried ( $\text{Na}_2\text{SO}_4$ ) and concentrated to obtain crude product **22**:  **$^1\text{H NMR}$**  (500 MHz,  $\text{CDCl}_3$ )  $\delta$  0.88 (t,  $J = 7.1$  Hz, 3H), 1.17-1.46 (m, 24H), 1.50-1.59 (m, 1H), 1.62-1.71 (m, 1H), 2.66 (d,  $J = 9.2$  Hz, 1H), 3.06 (d,  $J = 9.1$  Hz, 1H), 3.43 (dd,  $J = 6.9, 9.3$  Hz, 1H), 3.49 (dd,  $J = 5.9, 9.3$  Hz, 1H), 3.54-3.59 (m, 1H), 3.61-3.68 (m, 1H), 3.80 (dd,  $J = 2.7, 9.8$  Hz, 1H), 3.91-3.93 (m, 1H), 3.97-4.01 (m, 1H), 4.10 (dd,  $J = 6.0, 9.8$  Hz, 1H), 4.36 (d,  $J = 11.7$  Hz, 1H), 4.44 (d,  $J = 11.7$  Hz, 1H), 4.56 (d,  $J = 11.4$  Hz, 1H), 4.68 (d,  $J = 11.7$  Hz, 1H), 4.74-4.84 (m, 4H), 4.89 (dt,  $J = 2.7, 8.5$  Hz, 1H), 4.92 (d,  $J = 11.6$  Hz, 1H), 7.23-7.44 (m, 21H);  **$^{13}\text{C NMR}$**  (125 MHz,  $\text{CDCl}_3$ )  $\delta$  14.1, 22.7, 25.7, 29.4, 29.51, 29.56,

29.61, 29.64, 29.68, 31.9, 33.3, 45.2, 67.3, 68.6, 72.2, 72.8, 72.9, 73.5, 73.7, 73.9, 74.3, 74.8, 75.5, 80.0, 81.3, 83.0, 92.1, 127.6, 127.7, 127.86, 127.97, 128.07, 128.16, 128.26, 128.31, 128.43, 128.47, 128.54, 137.4, 137.5, 138.2, 138.3, 161.0; **HRMS** (ESI,  $\text{MNH}_4^+$ )  $m/z$  calcd for  $\text{C}_{55}\text{H}_{74}\text{Cl}_3\text{N}_2\text{O}_8^+$  995.4505, found 995.4503.

To crude **22** in EtOH (10 mL) was added aqueous 6 *N* NaOH (5 mL). The air was replaced with nitrogen, and the solution was stirred at rt for 6 h. Et<sub>2</sub>O (50 mL) was added, the organic layer was separated, the aqueous layer was washed with Et<sub>2</sub>O (2×50 mL), dried ( $\text{K}_2\text{CO}_3$ ), and filtered. Concentration afforded **23** as a white solid residue (195 mg, 68% two steps from **21**). To a solution of the crude amine **23** in THF (5 mL) were added Et<sub>3</sub>N (163  $\mu\text{L}$ , 1.17 mmol) and *n*-hexacosanoyl chloride<sup>S8,S9</sup> (0.281 mmol, in 1 mL of THF) at 0 °C. The mixture was stirred at rt for 30 min, quenched with saturated aqueous  $\text{NH}_4\text{Cl}$  solution, and extracted with  $\text{CH}_2\text{Cl}_2$  (3×30 mL). The combined organic layers were dried ( $\text{Na}_2\text{SO}_4$ ), concentrated, and purified by flash chromatography (EtOAc/hexanes 1:3 to 1:2) to yield amide **24** (208 mg, 73%): **<sup>1</sup>H NMR** (500 MHz,  $\text{CDCl}_3$ )  $\delta$  0.88 (t,  $J = 7.1$  Hz, 6H), 1.15-1.42 (m, 70H), 1.50-1.65 (m, 2H), 2.15 (t,  $J = 7.1$  Hz, 2H), 2.65 (br s, 1H), 3.16 (br s, 1H), 3.42-3.53 (m, 1H), 3.55-3.63 (m, 1H), 3.78-3.83 (m, 1H), 3.90-3.93 (m, 1H), 3.98 (t,  $J = 5.8$  Hz, 1H), 4.08 (dd,  $J = 5.8, 9.6$  Hz, 1H), 4.37 (d,  $J = 11.7$  Hz, 1H), 4.45 (d,  $J = 11.7$  Hz, 1H), 4.56 (d,  $J = 11.4$  Hz, 1H), 4.68 (d,  $J = 11.7$  Hz, 1H), 4.74-4.86 (m, 4H), 4.93 (d,  $J = 11.4$  Hz, 1H), 5.00 (d,  $J = 7.7$  Hz, 1H), 6.08 (d,  $J = 8.0$  Hz, 1H), 7.22-7.46 (m, 20H); **<sup>13</sup>C NMR** (125 MHz,  $\text{CDCl}_3$ )  $\delta$  14.1, 22.7, 25.5, 25.9, 29.25, 29.32, 29.34, 29.48, 29.53, 29.59, 29.63, 29.68, 31.9, 33.5, 36.5, 42.9, 67.3, 68.6, 72.5, 72.7, 72.9, 73.5, 73.7, 74.4, 74.7, 74.8, 75.5, 79.79, 79.83, 85.0, 127.62, 127.95, 127.8, 127.96, 128.02, 128.08, 128.2, 128.4, 128.5, 137.4, 137.6, 138.3, 138.5, 146.1, 172.3; **HRMS** (ESI,  $\text{MH}^+$ )  $m/z$  calcd for  $\text{C}_{79}\text{H}_{122}\text{NO}_8^+$  1212.9165, found 1212.9184.

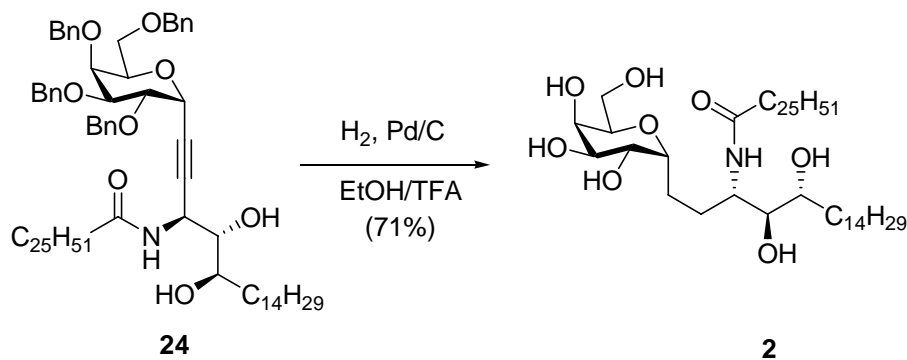

***N*-((3*S*,4*S*,5*R*)-1-( $\alpha$ -*C*-*D*-Galactopyranosyl)-nonadecane-4,5-diol-3-yl)-hexacosanamide (2).**

Amide **24** (48 mg, 0.040 mmol) was suspended in EtOH (95%)/TFA (30:1, 10.3 mL) at rt. After Pd/C (100 mg, 10% Pd) was added, the reaction vessel was purged with H<sub>2</sub> for 10 min. The mixture was stirred at rt for 48 h under a balloon filled with H<sub>2</sub>. The suspension was filtered through Celite, which was washed with CHCl<sub>3</sub>/MeOH (1:1, 30 mL) followed by pyridine (20 mL). The filtrate was concentrated, and the residue was purified by flash chromatography (CHCl<sub>3</sub>/MeOH 8:1) and was then lyophilized with benzene to afford **2** (24 mg, 71%) as a white powder:  $[\alpha]_{\text{D}}^{25} +33.7$  (*c* 0.2, pyridine) [lit.<sup>8</sup>  $[\alpha]_{\text{D}}^{25} +38.4$  (*c* 0.13, pyridine); lit.<sup>9</sup>  $[\alpha]_{\text{D}}^{25} +40.8$  (*c* 0.13, pyridine)]; **<sup>1</sup>H NMR** (500 MHz, d<sub>5</sub>-pyridine)  $\delta$  0.87 (t, *J* = 6.4 Hz, 6H), 1.16-1.50 (m, 66H), 1.66-1.76 (m, 1H), 1.82-1.91 (m, 2H), 1.90-2.01 (m, 2H), 2.17-2.27 (m, 1H), 2.28-2.40 (m, 2H), 2.43-2.52 (m, 2H), 2.57-2.67 (m, 1H), 2.71-2.80 (m, 1H), 4.19-4.29 (m, 4H), 4.38 (dd, *J* = 4.6, 11.2 Hz, 1H), 4.50-4.57 (m, 3H), 4.76 (dd, *J* = 5.5, 8.9 Hz, 1H), 5.14-5.21 (m, 1H), 8.55 (d, *J* = 9.0 Hz, 1H); **<sup>13</sup>C NMR** (125 MHz, d<sub>5</sub>-pyridine)  $\delta$  14.8, 23.4, 26.9, 30.1, 30.1, 30.3, 30.5, 30.7, 32.6, 34.9, 37.4, 53.1, 63.2, 70.8, 71.1, 72.7, 73.0, 74.2, 77.6, 79.0, 173.8; **HRMS** (ESI, MH<sup>+</sup>) *m/z* calcd for C<sub>51</sub>H<sub>101</sub>NNaO<sub>8</sub><sup>+</sup> 878.7419, found 878.7420. Table S1 shows that the <sup>1</sup>H and <sup>13</sup>C NMR spectra and the  $[\alpha]_{\text{D}}^{25}$  value are in full agreement with the literature data.<sup>S9,S10</sup>



Table S1. Comparison of  $^1\text{H}$  and  $^{13}\text{C}$  NMR data and  $[\alpha]_{\text{D}}^{25}$  value

|                                            | Ref. S10                                                                                                                                  | Ref. S9                                                                                                                                   | Our data                                                                                                                                  |
|--------------------------------------------|-------------------------------------------------------------------------------------------------------------------------------------------|-------------------------------------------------------------------------------------------------------------------------------------------|-------------------------------------------------------------------------------------------------------------------------------------------|
| $^1\text{H}$ (500 MHz, $d_5$ -pyridine)    | 8.47 (d, $J = 8.8$ Hz, 1H)                                                                                                                | 8.37 (d, 1 H, $J = 8.9$ Hz)                                                                                                               | 8.55 (d, $J = 9.0$ Hz, 1H)                                                                                                                |
|                                            | 5.14 (m, 1H)                                                                                                                              | 5.09 (dd, 1 H)                                                                                                                            | 5.21-5.14 (m, 1H)                                                                                                                         |
|                                            | 4.74 (dd, $J = 5.8, 8.8$ Hz, 1H)                                                                                                          | 4.70 (dd, $J = 5.5, 8.7$ Hz, 1H)                                                                                                          | 4.76 (dd, $J = 5.5, 8.9$ Hz, 1H)                                                                                                          |
|                                            | 4.52 (m, 3H)                                                                                                                              | 4.55-4.43 (m, 3 H)                                                                                                                        | 4.57-4.50 (m, 3H)                                                                                                                         |
|                                            | 4.37 (dd, $J = 4.3, 11.0$ Hz, 1H)                                                                                                         | 4.35 (dd, $J = 4.5, 11.2$ Hz, 1H)                                                                                                         | 4.38 (dd, $J = 4.6, 11.2$ Hz, 1H)                                                                                                         |
|                                            | 4.25 (m, 4H)                                                                                                                              | 4.26-4.15 (m, 4 H)                                                                                                                        | 4.29-4.19 (m, 4H)                                                                                                                         |
|                                            | 2.72 (m, 1H)                                                                                                                              | 2.75-2.62 (m, 1 H)                                                                                                                        | 2.80-2.71 (m, 1H)                                                                                                                         |
|                                            | 2.59 (m, 1H)                                                                                                                              | 2.61-2.51 (m, 1 H)                                                                                                                        | 2.67-2.57 (m, 1H)                                                                                                                         |
|                                            | 2.48 (m, 1H)                                                                                                                              | 2.51-2.37 (m, 2 H)                                                                                                                        | 2.52-2.43 (m, 2H)                                                                                                                         |
|                                            | 2.33 (m, 2H)                                                                                                                              | 2.37-2.25 (m, 2 H)                                                                                                                        | 2.40-2.28 (m, 2H)                                                                                                                         |
|                                            | 2.22 (m, 1H)                                                                                                                              | 2.25-2.13 (m, 1 H)                                                                                                                        | 2.27-2.17 (m, 1H)                                                                                                                         |
|                                            | 1.94 (m, 2H)                                                                                                                              | 2.00-1.78 (m, 4 H)                                                                                                                        | 2.01-1.90 (m, 2H)                                                                                                                         |
|                                            | 1.86 (m, 3H)                                                                                                                              |                                                                                                                                           | 1.91-1.82 (m, 2H)                                                                                                                         |
|                                            | 1.71 (m, 1H)                                                                                                                              | 1.78-1.61 (m, 1 H)                                                                                                                        | 1.76-1.66 (m, 1H)                                                                                                                         |
|                                            | 1.37 (m, 64H)                                                                                                                             | 1.50-1.21 (m, 68 H)                                                                                                                       | 1.50-1.16 (m, 66H)                                                                                                                        |
|                                            | 0.88 (t, $J = 6.4$ Hz, 6H)                                                                                                                | 0.89 (t, $J = 6.4$ Hz, 6 H)                                                                                                               | 0.87 (t, $J = 6.4$ Hz, 6H)                                                                                                                |
| $^{13}\text{C}$ (125 MHz, $d_5$ -pyridine) | 173.8, 78.8, 77.3, 74.0, 73.0,<br>72.5, 70.9, 70.7, 63.1, 53.0,<br>37.3, 34.8, 32.4, 30.7, 30.5,<br>30.3, 30.1, 29.9, 26.9, 23.3,<br>14.6 | 173.8, 78.8, 77.3, 74.1, 73.0,<br>72.5, 70.9, 70.8, 63.1, 53.1,<br>37.3, 34.8, 32.4, 30.7, 30.5,<br>30.3, 30.1, 29.9, 26.9, 23.0,<br>14.6 | 173.8, 79.0, 77.6, 74.2, 73.0,<br>72.7, 71.1, 70.8, 63.2, 53.1,<br>37.4, 34.9, 32.6, 30.7, 30.5,<br>30.3, 30.1, 30.1, 26.9, 23.4,<br>14.8 |
|                                            | $[\alpha]_{\text{D}}^{25}$                                                                                                                |                                                                                                                                           |                                                                                                                                           |
|                                            | +40.8 ( <i>c</i> 0.13 pyridine)                                                                                                           | +38.4 ( <i>c</i> 0.13 pyridine)                                                                                                           | +33.7 ( <i>c</i> 0.20 pyridine)                                                                                                           |

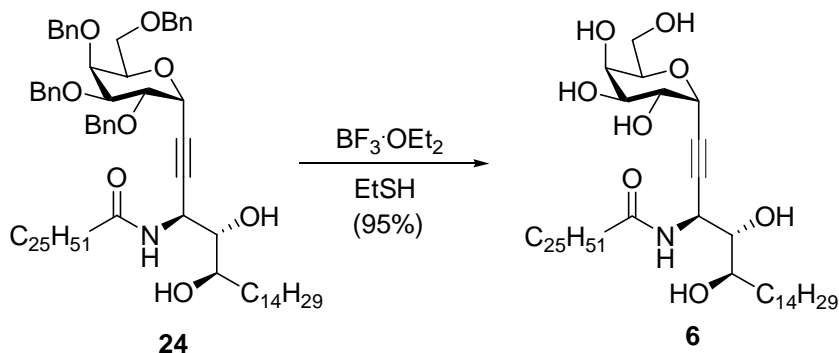

***N*-((3*S*,4*S*,5*R*)-1-( $\alpha$ -*C*-*D*-Galactopyranosyl)-nonadec-1-ynyl-4,5-diol-3-yl)-hexacosanamide (**6**).**

A solution of **24** (9.5 mg, 7.83  $\mu$ mol) in EtSH/BF<sub>3</sub>·OEt<sub>2</sub> (3:1, 1.3 mL) was stirred at rt for 24 h. The solvent was evaporated, and the residue was purified by column chromatography (CHCl<sub>3</sub>/MeOH 10:1) and lyophilized with benzene to afford **6** (6.3 mg, 95%) as a white powder:  $[\alpha]_D^{25} +62.2$  (*c* 0.09, pyridine); <sup>1</sup>H NMR (400 MHz, d<sub>5</sub>-pyridine)  $\delta$  0.85-0.90 (m, 6H), 1.16-1.52 (m, 66H), 1.65-1.84 (m, 3H), 1.86-1.98 (m, 2H), 2.29-2.38 (m, 1H), 2.41 (t, *J* = 7.5 Hz, 2H), 4.26 (dd, *J* = 3.1, 8.3 Hz, 1H), 4.33-4.43 (m, 2H), 4.47-4.57 (m, 3H), 4.70-4.79 (m, 2H), 5.30 (dd, *J* = 1.6, 5.9 Hz, 1H), 6.36 (dt, *J* = 2.2, 8.8 Hz, 1H), 9.23 (d, *J* = 8.8 Hz, 1H); <sup>13</sup>C NMR (100 MHz, d<sub>5</sub>-pyridine)  $\delta$  14.7, 23.4, 26.7, 30.1, 30.22, 30.26, 30.30, 30.39, 30.46, 30.50, 30.6, 30.9, 32.6, 35.3, 37.1, 46.1, 63.0, 69.8, 71.0, 71.2, 73.1, 73.4, 76.2, 78.5, 81.5, 87.6, 172.8; HRMS (ESI, MH<sup>+</sup>) *m/z* calcd for C<sub>51</sub>H<sub>98</sub>NO<sub>8</sub><sup>+</sup> 852.7287, found 852.7287.

## References

(S1) (a) Cohen, R. B.; Tsou, K.-C.; Rutenburg, S. H.; Seligman, A. M. *J. Biol. Chem.* **1952**, *195*, 239. (b) Hansen, R. G.; Rutter, W. J.; Krichevsky, P. *Biochem. Prep.* **1955**, *4*, 1. (c) Backinowsky, L. V.; Nepogod'ev, S. A.; Shashkov, A. S.; Kochetkov, N. K. *Carbohydr. Res.* **1985**, *138*, 41. (d) Maier, M. A.; Yannopoulos, C. G.; Mohamed, N.; Roland, A.; Fritz, H.; Mohan, V.; Just, G.; Manoharan, M. *Bioconj. Chem.* **2003**, *14*, 18. (e) Wang, Z. D.; Matin, M.; Sheikh, S. *Molecules* **2005**, *10*, 1325. (f) Bizier, N. P.; Atkins, S. R.; Helland, L. C.; Colvin, S. F.; Twitchell, J. R.; Cloninger, M. J. *Carbohydr.*

*Res.* **2008**, 343, 1814. (g) Singh, U. P.; Brown, R. K. *Can. J. Chem.* **1971**, 49, 1179. (h) Hudson, C. S.; Parker, H. O. *J. Am. Chem. Soc.* **1915**, 37, 1589. (i) Ness, R. K.; Fletcher Jr., H. G.; Hudson, C. S. *J. Am. Chem. Soc.* **1951**, 73, 3742.

(S2) Peracetylation of D-galactose (**A**) using Ac<sub>2</sub>O as solvent proceeded in low yield (30% to 55%)<sup>S1a,b</sup> because of the formation of an  $\alpha$ - and  $\beta$ -mixture of D-galactopyranose pentaacetate and D-galactofuranose pentaacetate.<sup>S1c</sup> Although the reaction in pyridine worked well,<sup>S1d,e</sup> pyridine is high boiling and noxious, and is also unsuitable for large-scale preparations.<sup>S1f</sup> In addition, the reaction in pyridine afforded the mixture of  $\alpha$  and  $\beta$ -D-galactopyranose pentaacetates ( $\alpha/\beta$  ratio 1.0:2.7)<sup>S1g</sup> as a colorless syrup. It was also reported that the reaction in pyridine delivered  $\beta$ -D-galactofuranose pentaacetates in 17% yield, which was recrystallized from 95% EtOH after removal of  $\beta$ -D-galactopyranose.<sup>S1i</sup>

(S3) (a) The preparation of **C** followed the reported procedure: Hunsen, M.; Long, D. A.; D'Ardenne, C. R.; Smith, A. L. *Carbohydr. Res.* **2005**, 340, 2670.

(S4) (a) Mukherjee, D.; Yousut, S. K.; Taneja, S. C. *Tetrahedron Lett.* **2008**, 49, 4944. (b) Montero, J.-L.; Winum, J.-Y.; Leydet, A.; Kamal, M.; Pavia, A. A.; Roque, J.-P. *Carbohydr. Res.* **1997**, 297, 175. (c) In addition to InCl<sub>3</sub>,<sup>S4a</sup> we found that the use of BiCl<sub>3</sub><sup>S4b</sup> proceeded with high efficiency.

(S5) **D** may be directly prepared from **B** in one step. However, the *R<sub>f</sub>* values of **B** and **D** are similar, making it difficult to monitor the reaction by TLC in the one-step procedure.

(S6) (a) Nokami, T.; Shibuya, A.; Tsuyama, H.; Suga, S.; Bowers, A. A.; Crich, D.; Yoshida, J.-I. *J. Am. Chem. Soc.* **2007**, 129, 10922. (b) Grayson, E. J.; Ward, S. J.; Hall, A. L.; Rendle, P. M.; Gamblin, D. P.; Batsanov, A. S.; Davis, B. G. *J. Org. Chem.* **2005**, 70, 9740. (c) Arya, P.; Barkley, A.; Randell, K. *D. J. Comb. Chem.* **2002**, 4, 193.

(S7) (a) Nishikawa, T.; Koide, Y.; Kajii, S.; Wada, K.; Ishikawa, M.; Isobe, M. *Org. Biomol. Chem.* **2005**, 3, 687. (b) Dondoni, A.; Moriotti, G.; Marra, A. *J. Org. Chem.* **2002**, 67, 4475.

(S8) Heidelberg, T.; Martin, O. R. *J. Org. Chem.* **2004**, *69*, 2290.

(S9) Wipf, P.; Pierce, J. G. *Org. Lett.* **2006**, *8*, 3375.

(S10) (a) Yang, G.; Schmieg, J.; Tsuji, M.; Franck, R. W. *Angew. Chem., Int. Ed. Engl.* **2004**, *43*, 3818. (b) Yang, G. Ph.D. Dissertation, The City University of New York, 2002.

1.9989  
2.0106  
2.0280  
2.0487  
2.0522  
2.0581  
2.0899  
2.0966  
2.1207  
2.1282  
2.1373  
2.1717  
2.2309

4.0747  
4.0899  
4.1039  
4.1196  
4.1315  
4.1478  
4.1656  
4.1761

5.0777  
5.0861  
5.1037  
5.1122  
5.3136  
5.3348  
5.3396  
5.3605  
5.4279  
5.4361  
5.7034  
5.7242

7.3079

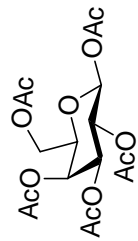

<sup>1</sup>H NMR (CDCl<sub>3</sub>, 500 MHz)  
crude **B** (before recrystallization)

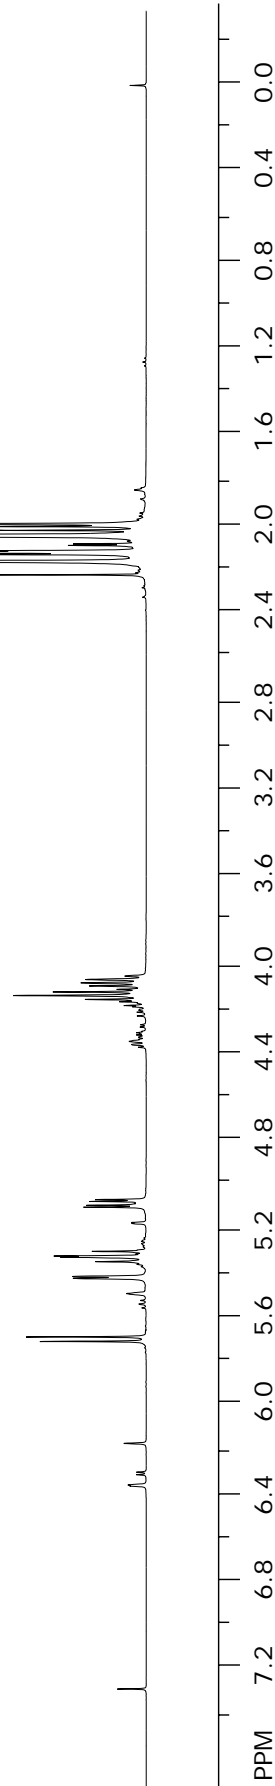

file: ...ettings\zliu\Desktop\hb0129\10\fid exp: <zg30>  
transmitter freq.: 400.132471 MHz  
time domain size: 65536 points  
width: 8278.15 Hz = 20.6885 ppm = 0.126314 Hz/pt  
number of scans: 16

freq. of 0 ppm: 400.129990 MHz  
processed size: 32768 complex points  
LB: 0.300 GF: 0.0000  
Hz/cm: 129.506 ppm/cm: 0.32366

168.8552  
169.2567  
169.8298  
170.0041

92.0075

60.9247  
66.6867  
67.6915  
70.6884  
71.5532  
76.6866  
77.0046  
77.3226

20.4246  
20.5142  
20.5344  
20.6948

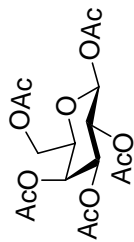

<sup>1</sup>H NMR (CDCl<sub>3</sub>, 500 MHz)  
crude **B** (before recrystallization)

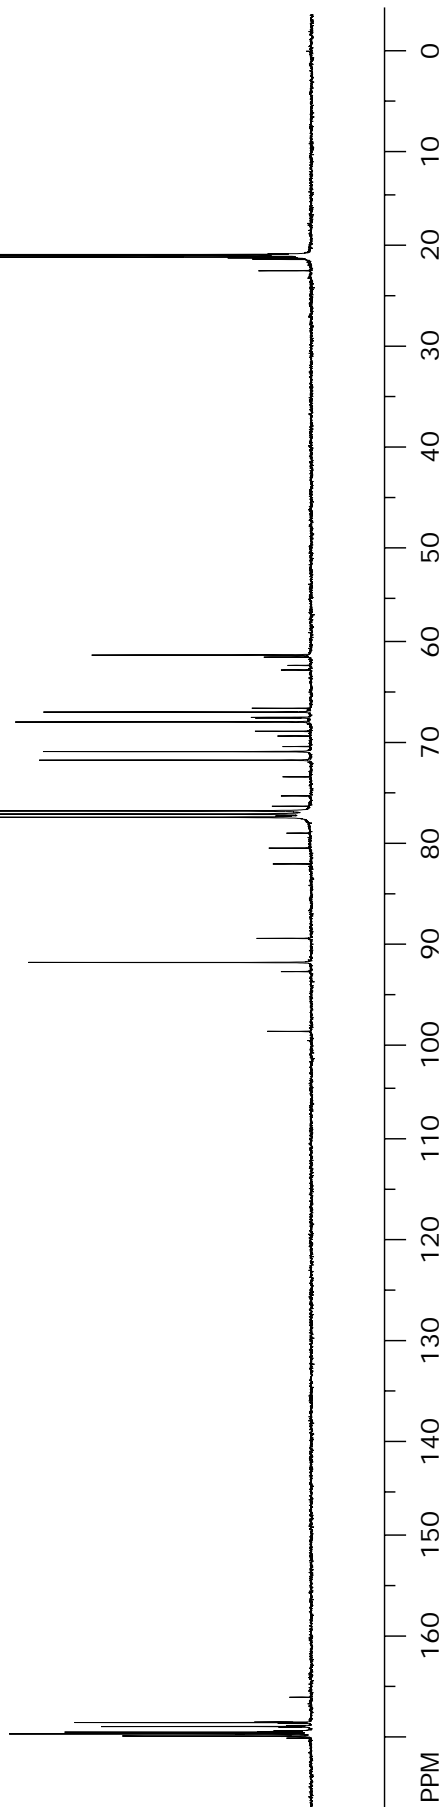

file: ...ettings\zliu\Desktop\hb0129\1\fid exp: <zpgg30>  
transmitter freq.: 100.622830 MHz  
time domain size: 65536 points  
width: 23980.82 Hz = 238.3238 ppm = 0.365918 Hz/pt  
number of scans: 4096

freq. of 0 ppm: 100.612778 MHz  
processed size: 32768 complex points  
LB: 1.000 GF: 0.0000  
Hz/cm: 730.087 ppm/cm: 7.25568

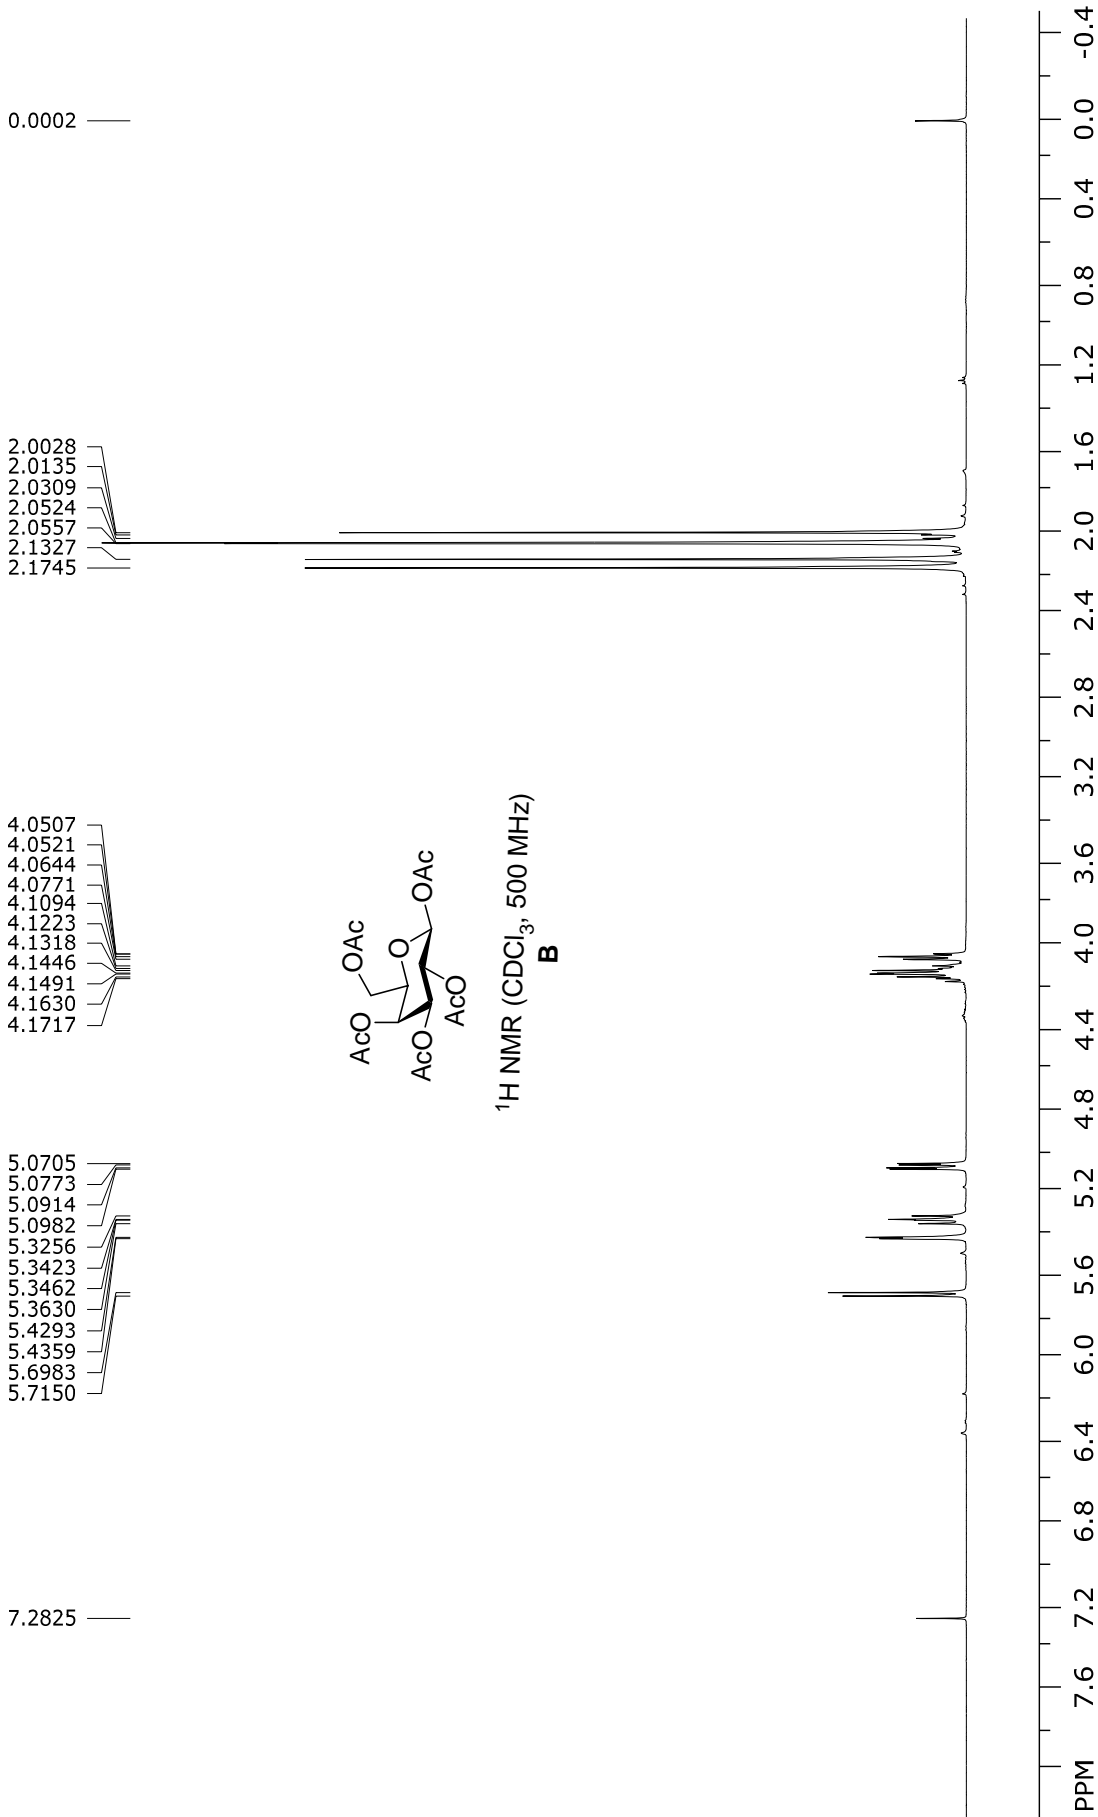

file: ... 500 3-1-2010\zh-hb-100427-2\1\fid exp: <zg30>  
 transmitter freq.: 500.133089 MHz  
 time domain size: 65536 points  
 width: 10330.58 Hz = 20.6557 ppm = 0.157632 Hz/pt  
 number of scans: 16

freq. of 0 ppm: 500.130003 MHz  
 processed size: 32768 complex points  
 LB: 0.300 GF: 0.0000  
 Hz/cm: 175.005 ppm/cm: 0.34992

168.9387  
169.3326  
169.9210  
170.0775  
170.3031

92.0502

60.9567  
66.6955  
67.6961  
70.7410  
71.5966  
76.6846  
77.0028  
77.3207

20.5017  
20.5949  
20.6157  
20.7756

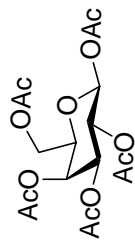

<sup>13</sup>C NMR (CDCl<sub>3</sub>, 100 MHz)  
**B**

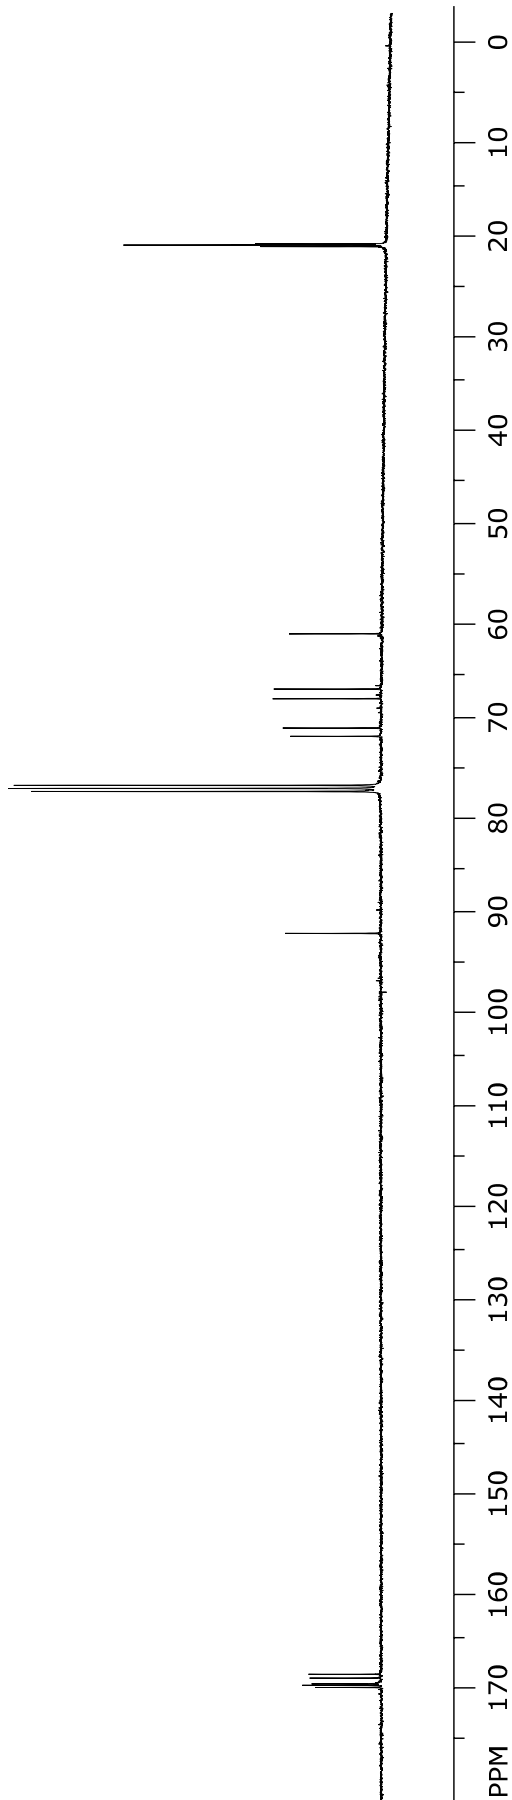

file: ... 400 3-13-10\zh-hb-100427-2\10\fid exp: <zpgg30>  
transmitter freq.: 100.622830 MHz  
time domain size: 65536 points  
width: 23980.82 Hz = 238.3238 ppm = 0.365918 Hz/pt  
number of scans: 4096

freq. of 0 ppm: 100.612776 MHz  
processed size: 32768 complex points  
LB: 1.000 GF: 0.0000  
Hz/cm: 747.435 ppm/cm: 7.42809



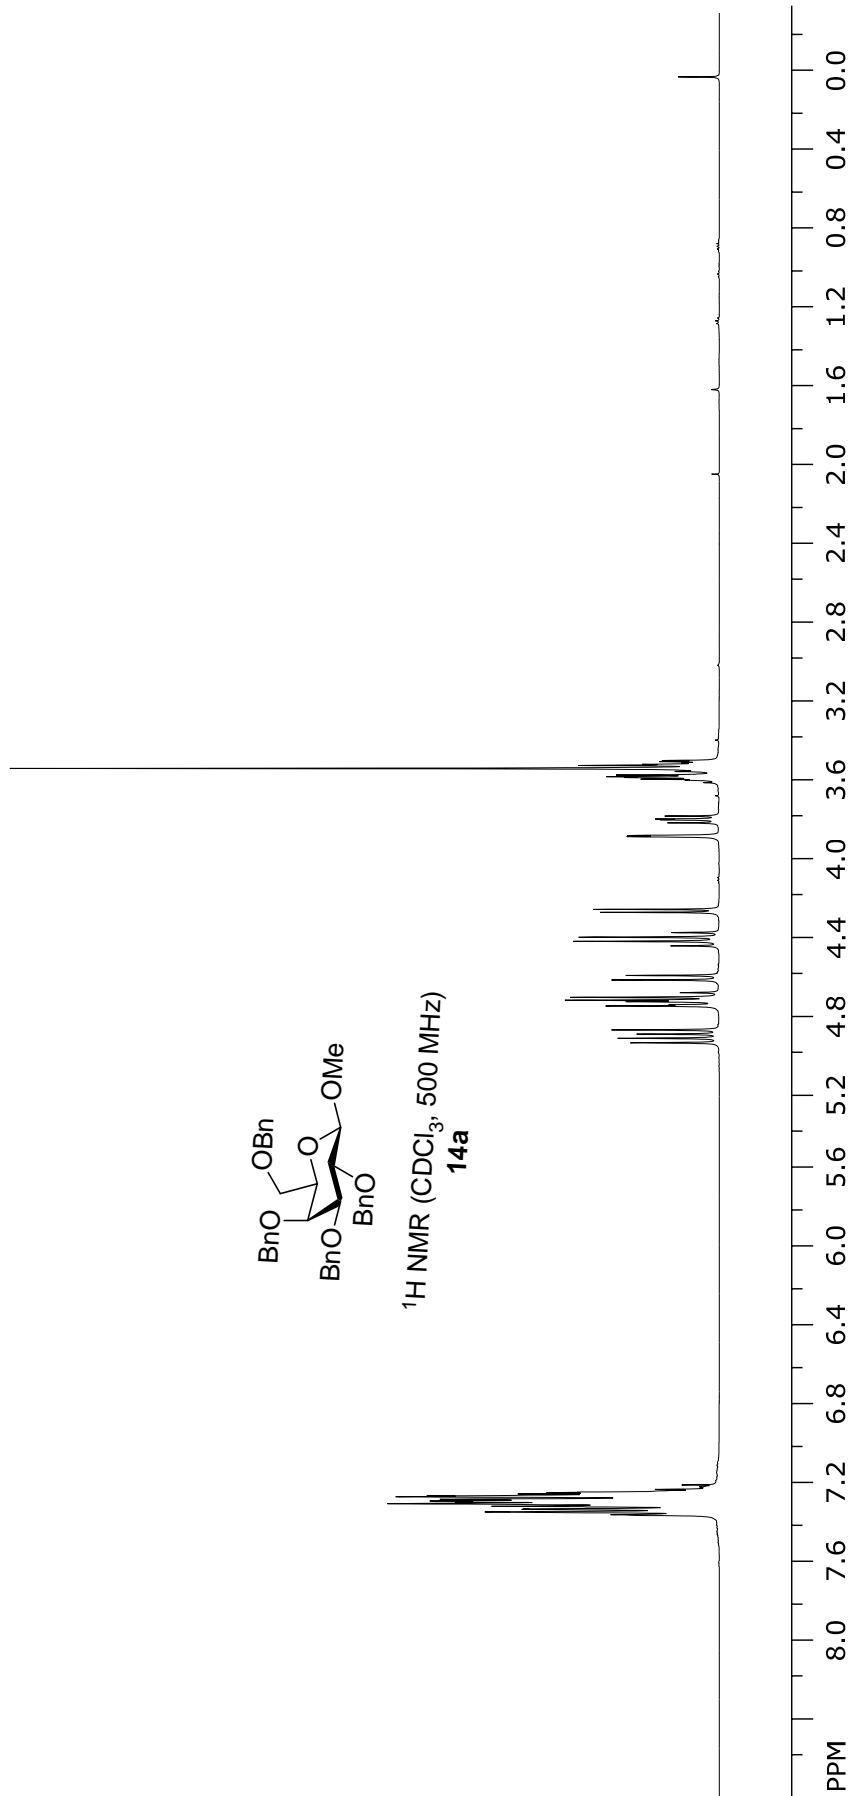

file: ... 500 3-1-2010\zh-hb-100427-1\1\fid exp: <zg30>  
transmitter freq.: 500.133089 MHz  
time domain size: 65536 points  
width: 10330.58 Hz = 20.6557 ppm = 0.157632 Hz/pt  
number of scans: 16

freq. of 0 ppm: 500.130034 MHz  
processed size: 32768 complex points  
LB: 0.300 GF: 0.0000  
Hz/cm: 183.101 ppm/cm: 0.36610

56.9893  
 68.7663  
 72.9119  
 73.2757  
 73.4875  
 74.3761  
 75.1051  
 76.6861  
 77.0037  
 77.3212  
 79.5710  
 82.0552

104.9055

127.4708  
 127.5087  
 127.7417  
 127.8483  
 128.0686  
 128.0981  
 128.2215  
 128.2478  
 128.3045  
 128.3757  
 137.8217  
 138.4266  
 138.5614  
 138.7303

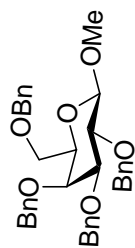

<sup>13</sup>C NMR (CDCl<sub>3</sub>, 100 MHz)  
**14a**

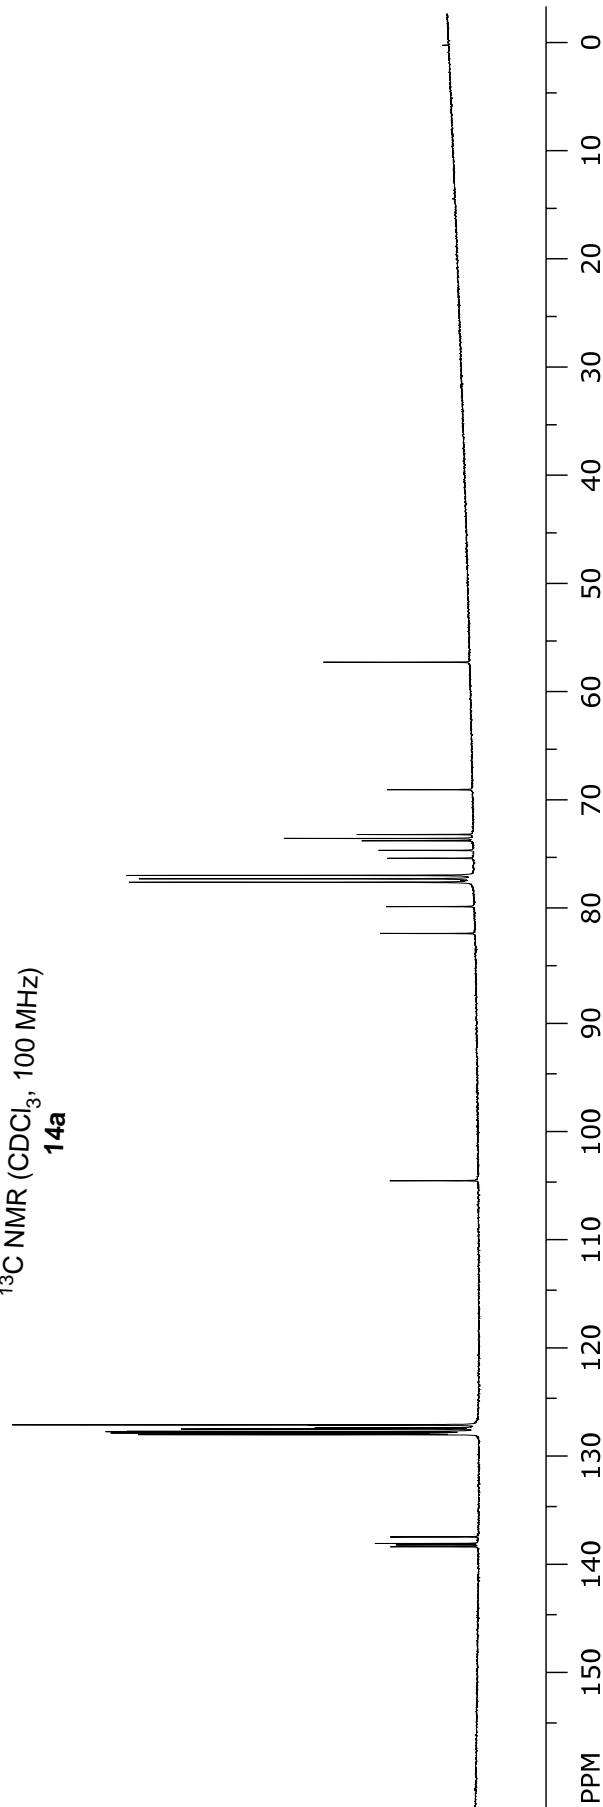

file: ... 400 3-13-10\zh-hb-100427-1\10\fid exp: <zgpg30>  
 transmitter freq.: 100.622830 MHz  
 time domain size: 65536 points  
 width: 23980.82 Hz = 238.3238 ppm = 0.365918 Hz/pt  
 number of scans: 4096

freq. of 0 ppm: 100.612781 MHz  
 processed size: 32768 complex points  
 LB: 1.000 GF: 0.0000  
 Hz/cm: 667.921 ppm/cm: 6.63787

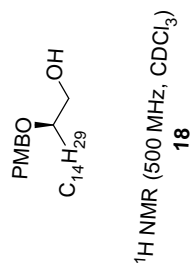

$^1\text{H}$  NMR (500 MHz,  $\text{CDCl}_3$ )  
**18**

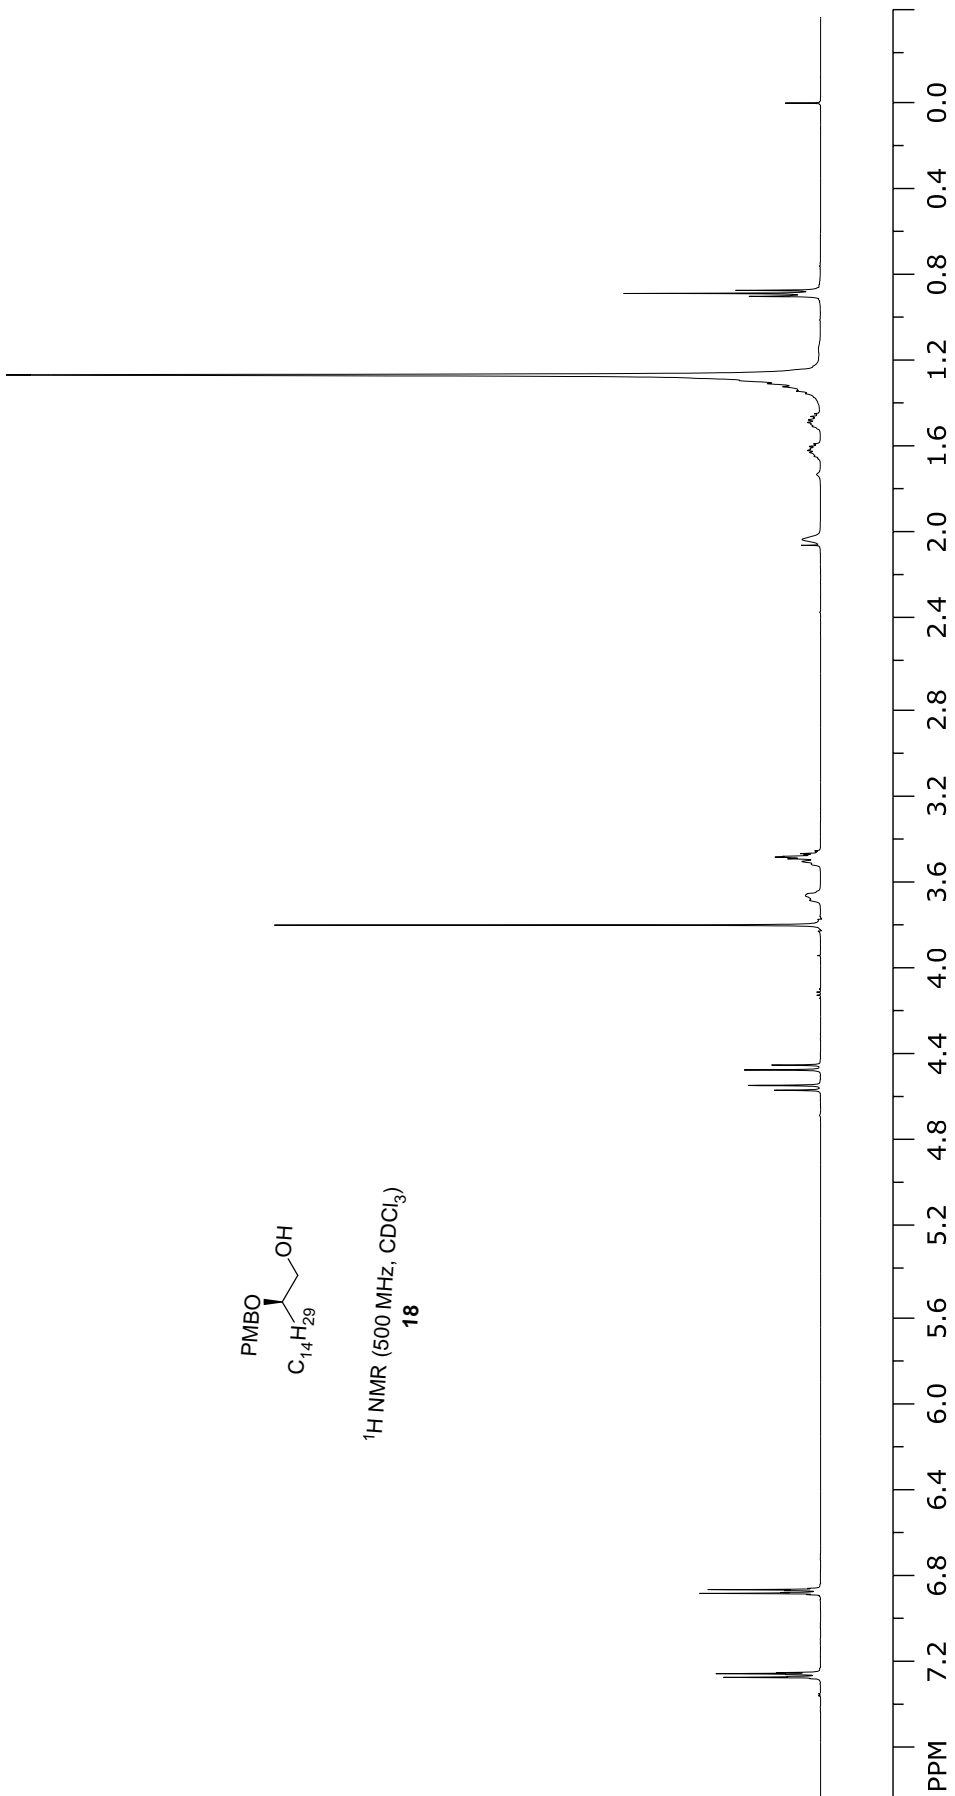

file: ... \NMR 500 3-1-2010\zh091030s2\1\fid exp: <zg30>  
 transmitter freq.: 500.133089 MHz  
 time domain size: 65536 points  
 width: 10330.58 Hz = 20.6557 ppm = 0.157632 Hz/pt  
 number of scans: 16

freq. of 0 ppm: 500.130013 MHz  
 processed size: 32768 complex points  
 LB: 0.300 GF: 0.0000  
 Hz/cm: 164.729 ppm/cm: 0.32937

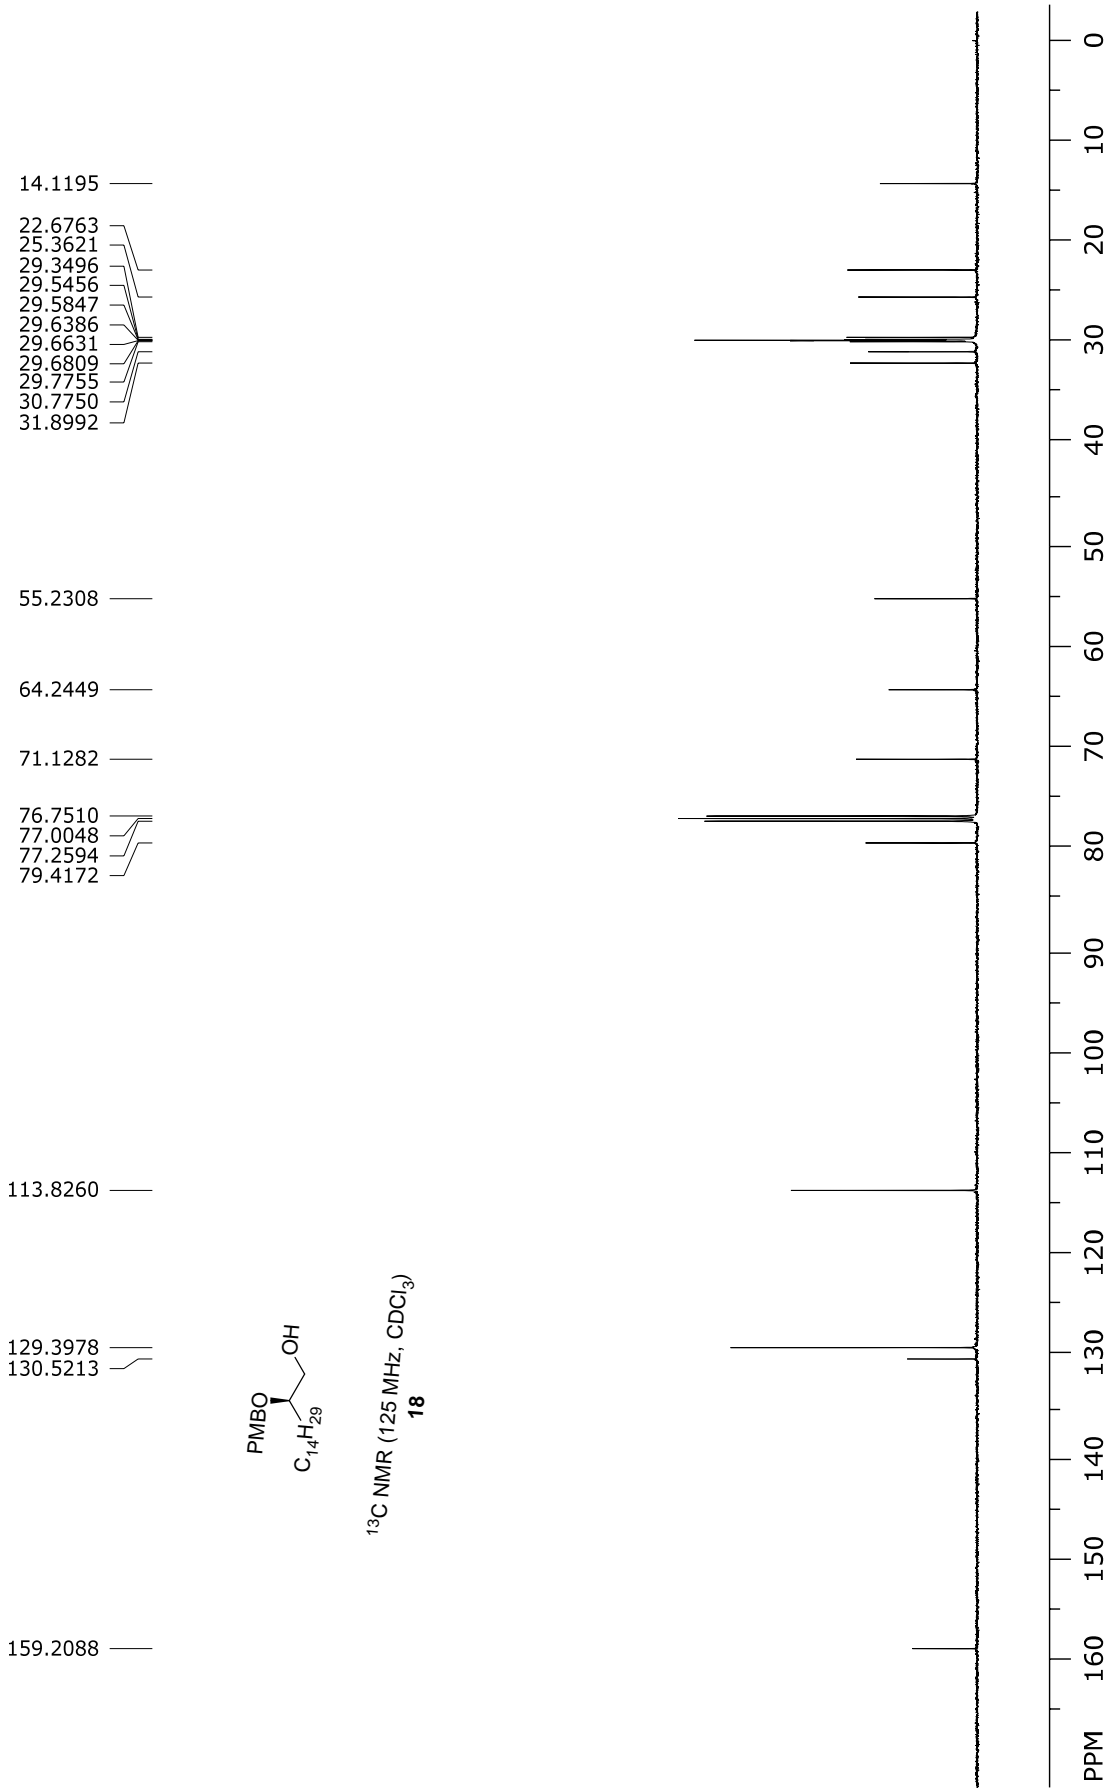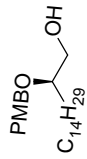

<sup>13</sup>C NMR (125 MHz, CDCl<sub>3</sub>)  
**18**

file: ... \NMR 500 3-1-2010\zh091030s2\2\fid exp: <zpgp30>  
 transmitter freq.: 125.771622 MHz  
 time domain size: 65536 points  
 width: 31250.00 Hz = 248.4662 ppm = 0.476837 Hz/pt  
 number of scans: 1024  
 freq. of 0 ppm: 125.757798 MHz  
 processed size: 32768 complex points  
 LB: 1.000 GF: 0.0000  
 Hz/cm: 884.514 ppm/cm: 7.03270

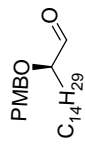

<sup>1</sup>H NMR (500 MHz, CDCl<sub>3</sub>)  
**15**

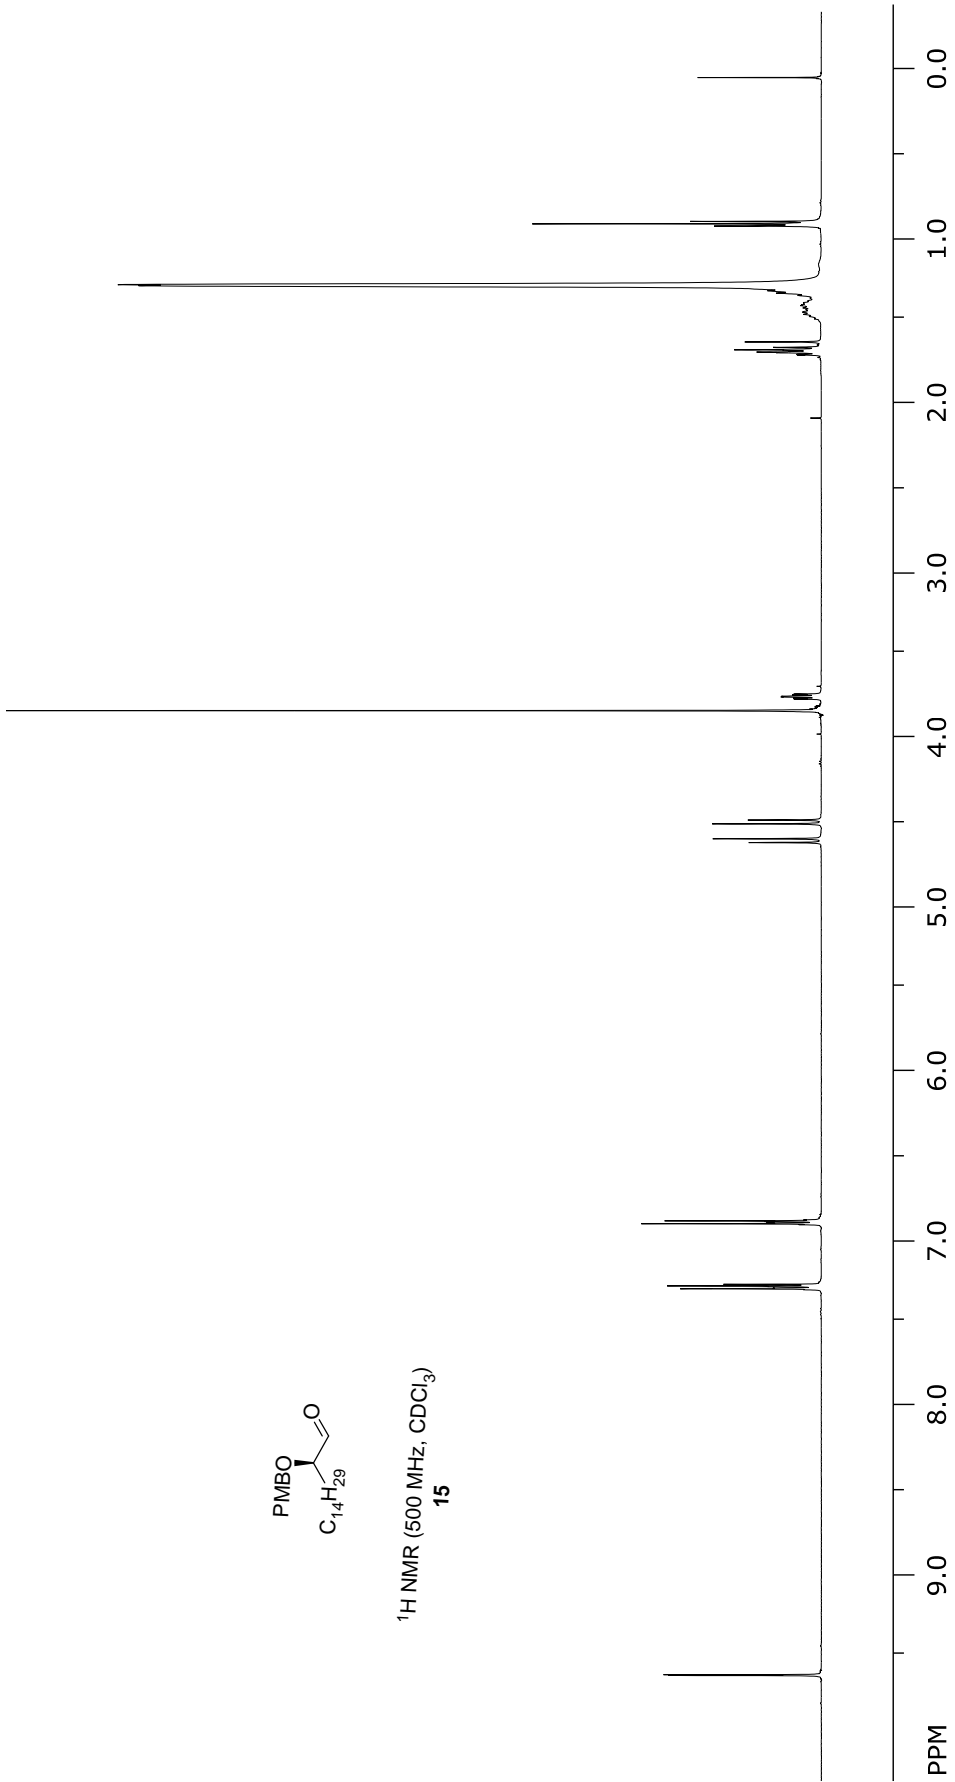

file: ... \NMR 500 3-1-2010\zh091101s2\1\fid exp: <zg30>  
transmitter freq.: 500.133089 MHz  
time domain size: 65536 points  
width: 10330.58 Hz = 20.6557 ppm = 0.157632 Hz/pt  
number of scans: 16

freq. of 0 ppm: 500.130000 MHz  
processed size: 32768 complex points  
LB: 0.300 GF: 0.0000  
Hz/cm: 212.995 ppm/cm: 0.42588

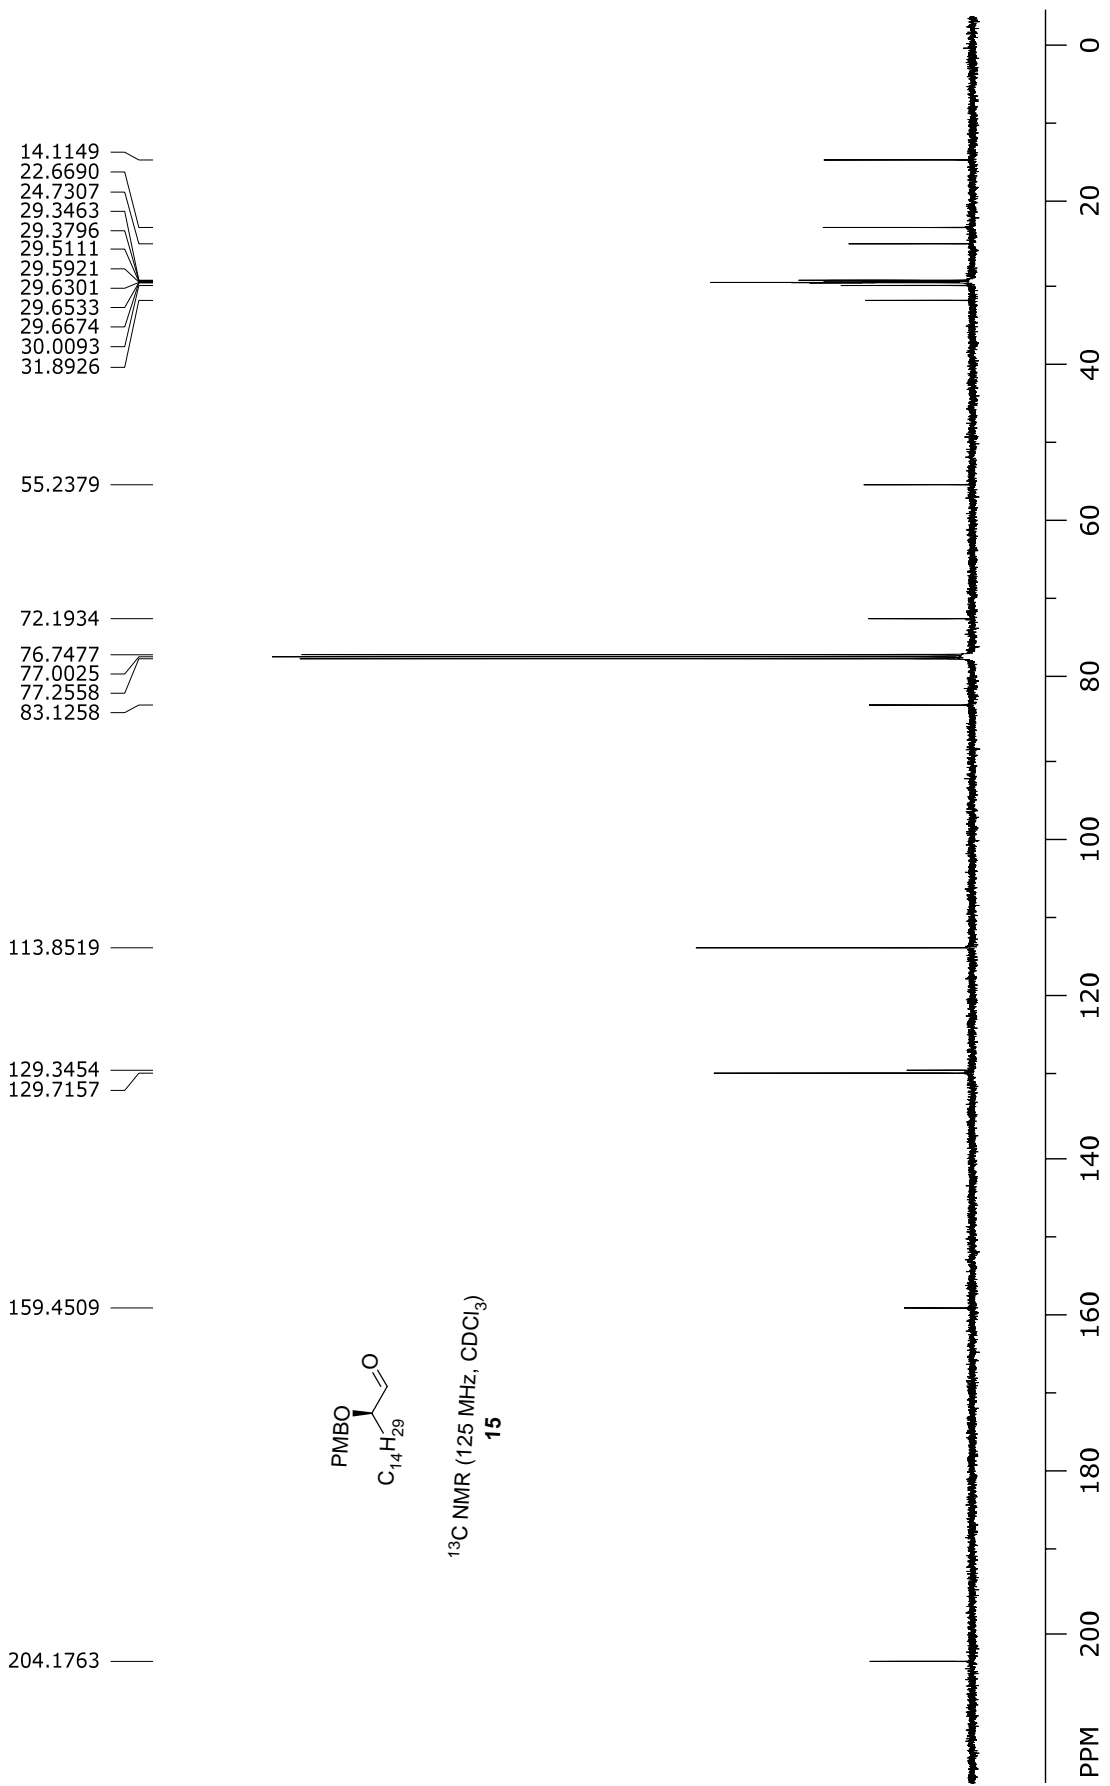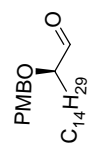

<sup>13</sup>C NMR (125 MHz, CDCl<sub>3</sub>)  
**15**

file: ... \NMR 500 3-1-2010\zh091101s2\2\fid exp: <zpgg30>  
 transmitter freq.: 125.771622 MHz  
 time domain size: 65536 points  
 width: 31250.00 Hz = 248.4662 ppm = 0.476837 Hz/pt  
 number of scans: 512

freq. of 0 ppm: 125.757798 MHz  
 processed size: 32768 complex points  
 LB: 1.000 GF: 0.0000  
 Hz/cm: 1124.717 ppm/cm: 8.94254

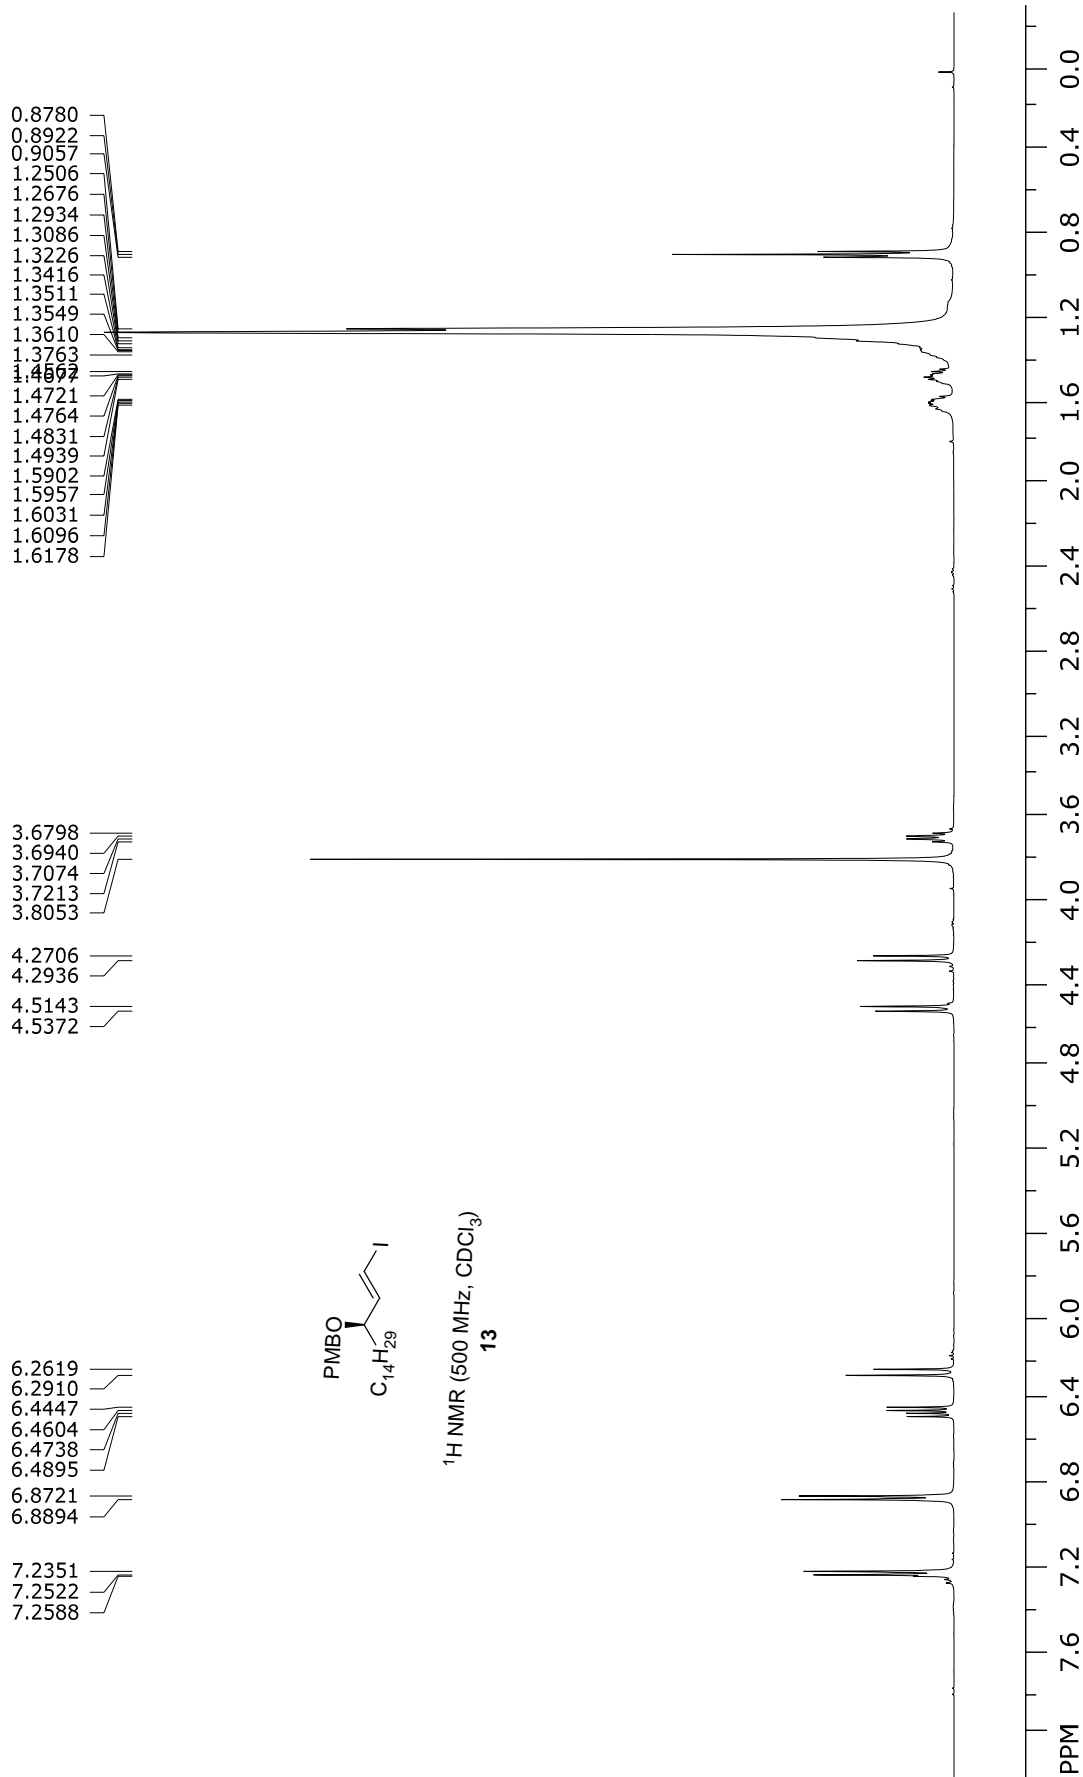

file: ...\\NMR 500 3-1-2010\zh091107s2\1\fid exp: <zg30>  
 transmitter freq.: 500.133089 MHz  
 time domain size: 65536 points  
 width: 10330.58 Hz = 20.6557 ppm = 0.157632 Hz/pt  
 number of scans: 16

freq. of 0 ppm: 500.130015 MHz  
 processed size: 32768 complex points  
 LB: 0.300 GF: 0.0000  
 Hz/cm: 170.334 ppm/cm: 0.34058

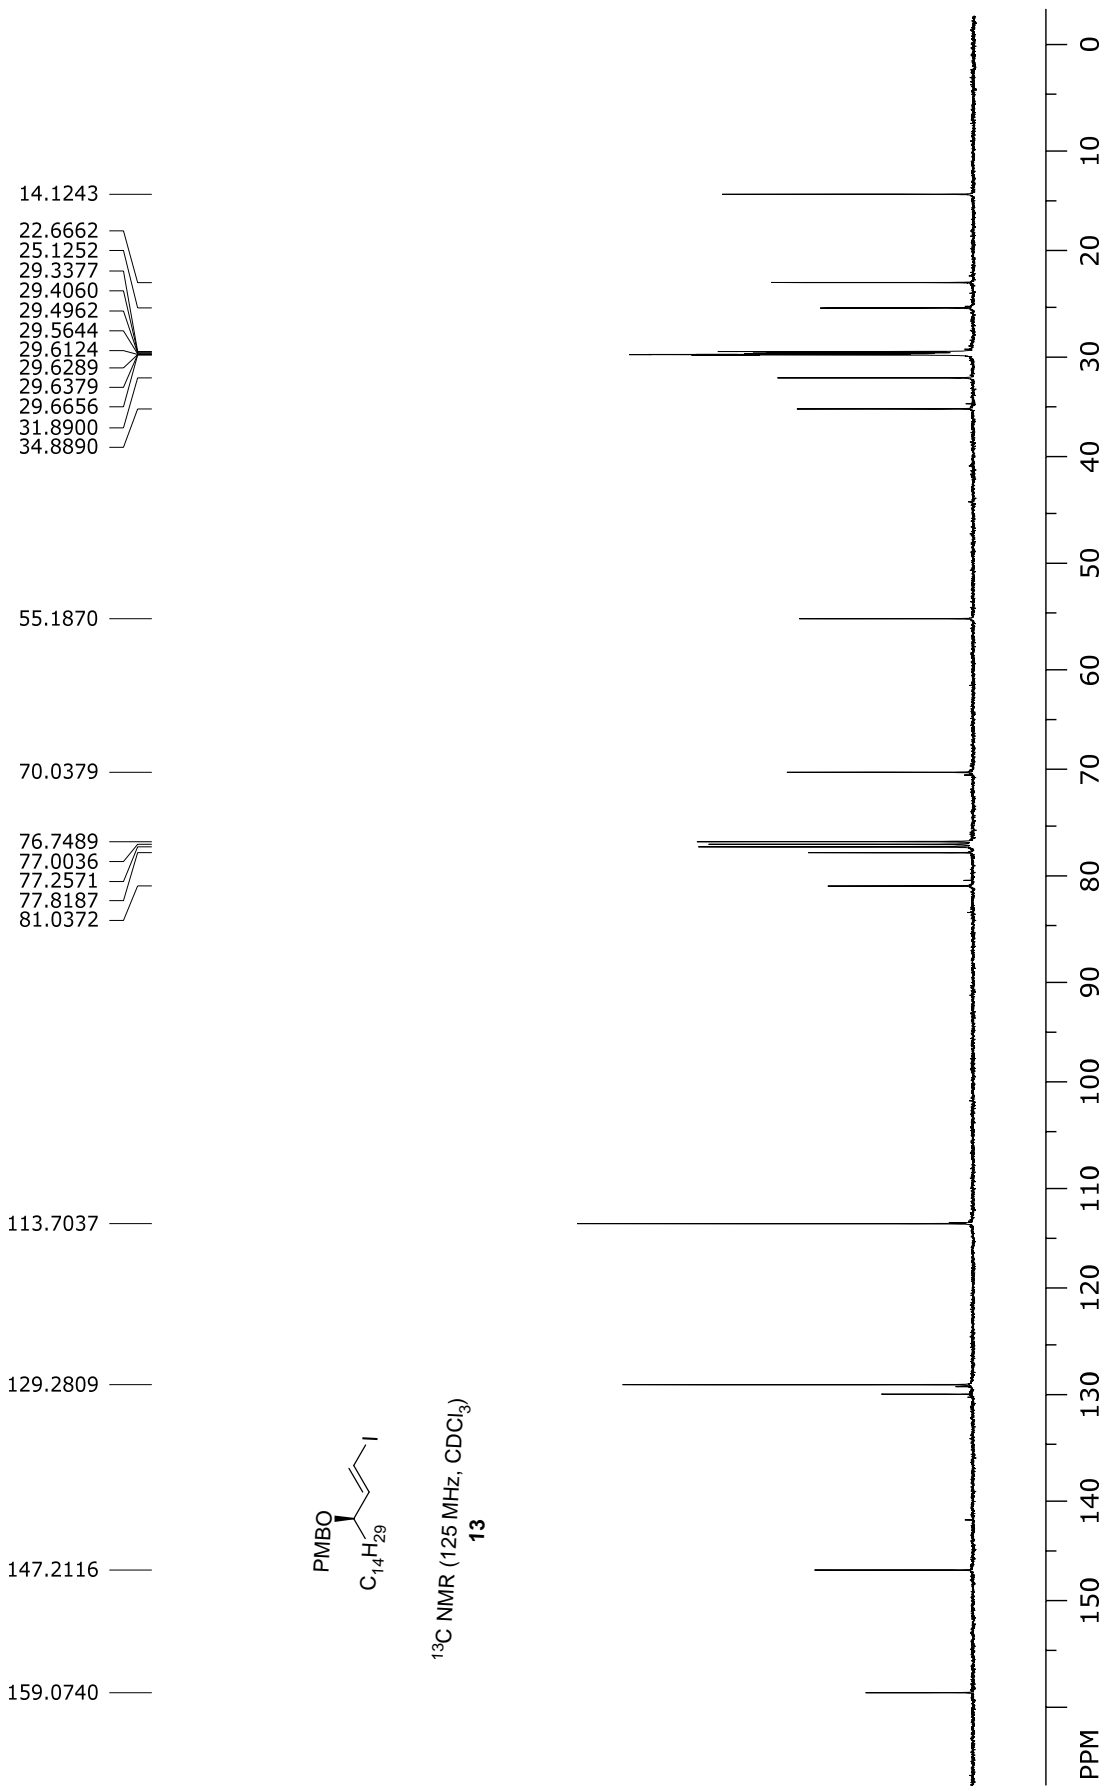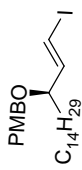

<sup>13</sup>C NMR (125 MHz, CDCl<sub>3</sub>)  
**13**

file: ... \NMR 500 3-1-2010\zh091107s2\2\fid exp: <zpgg30>  
 transmitter freq.: 125.771622 MHz  
 time domain size: 65536 points  
 width: 31250.00 Hz = 248.4662 ppm = 0.476837 Hz/pt  
 number of scans: 512

freq. of 0 ppm: 125.757802 MHz  
 processed size: 32768 complex points  
 LB: 1.000 GF: 0.0000  
 Hz/cm: 860.965 ppm/cm: 6.84546



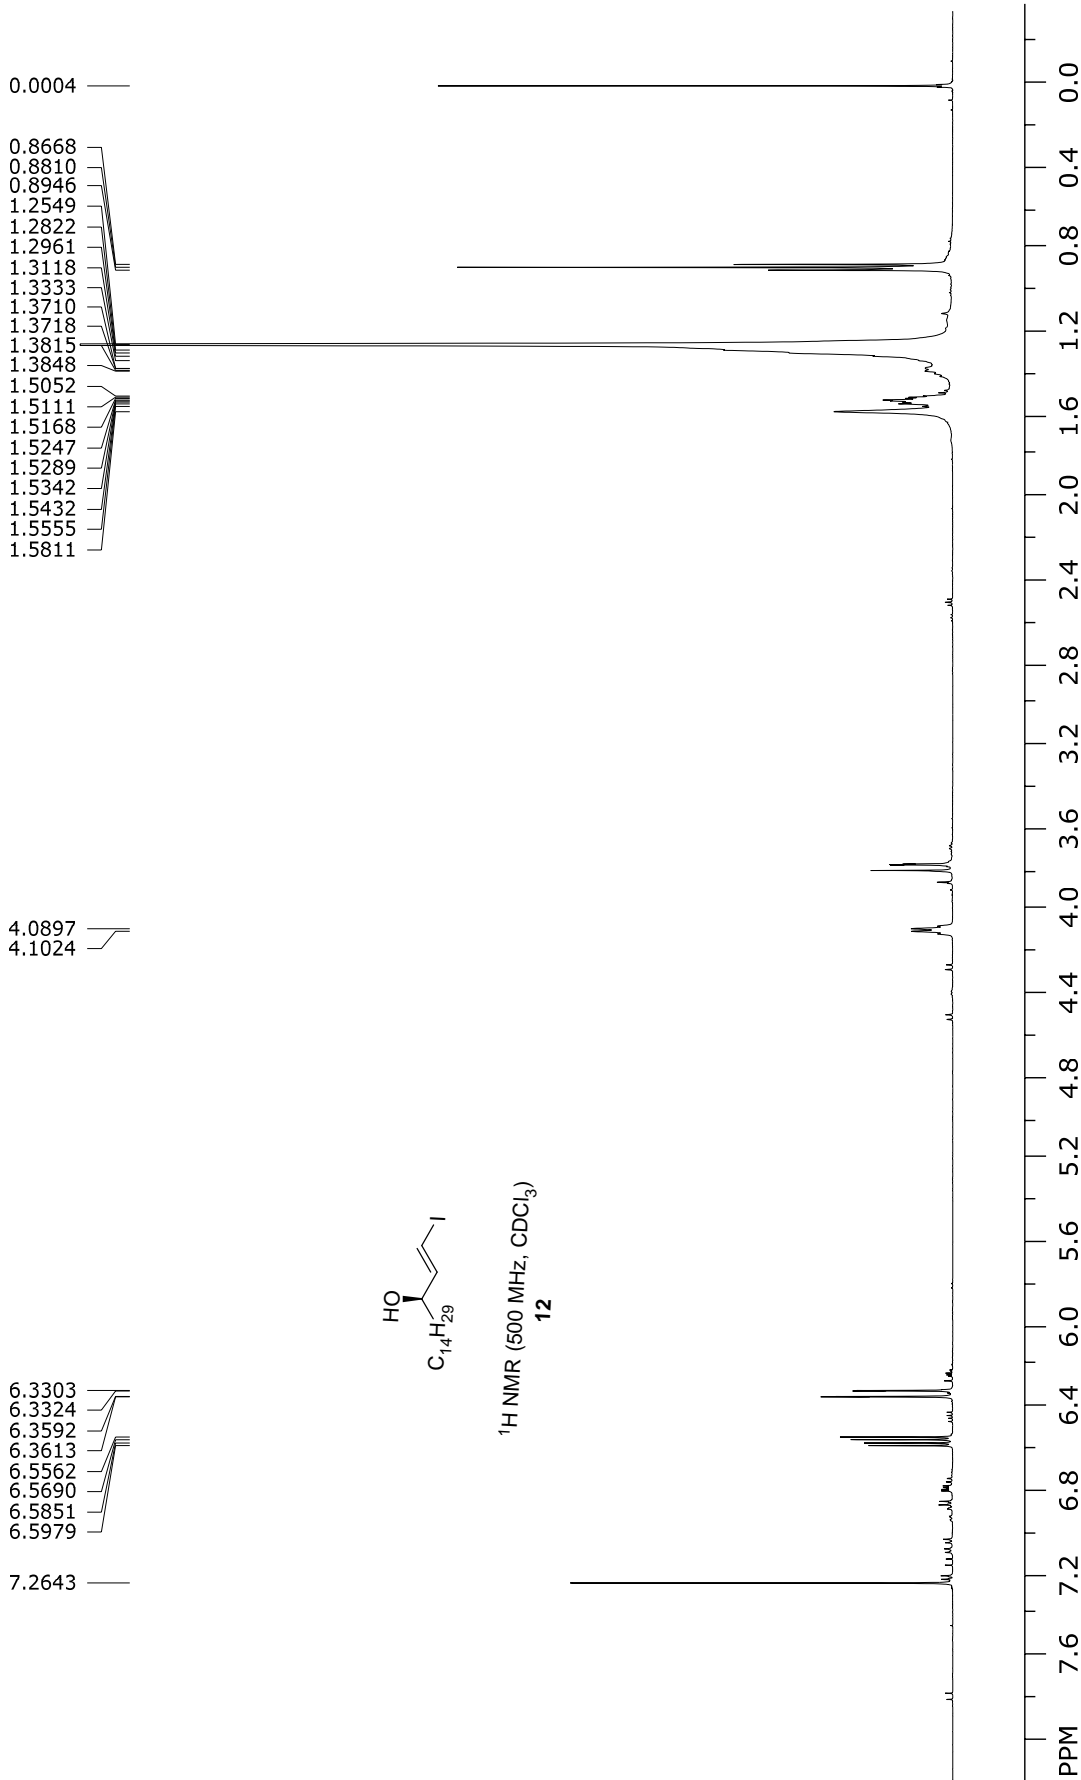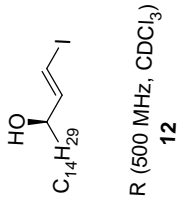

<sup>1</sup>H NMR (500 MHz, CDCl<sub>3</sub>)

file: ...\\NMR 500 3-1-2010\\zh091113s2\\1\\fid exp: <zg30>  
 transmitter freq.: 500.133089 MHz  
 time domain size: 65536 points  
 width: 10330.58 Hz = 20.6557 ppm = 0.157632 Hz/pt  
 number of scans: 16  
 freq. of 0 ppm: 500.130012 MHz  
 processed size: 32768 complex points  
 LB: 0.300 GF: 0.0000  
 Hz/cm: 171.891 ppm/cm: 0.34369

148.6746

74.7385  
76.7489  
76.8660  
77.0034  
77.0839  
77.1201  
77.2569

14.1390  
22.6916  
25.1114  
29.3577  
29.4259  
29.5092  
29.5587  
29.6246  
29.6500  
29.6773  
31.9138  
36.5692

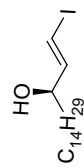

$^{13}C$  NMR (125 MHz,  $CDCl_3$ )  
**12**

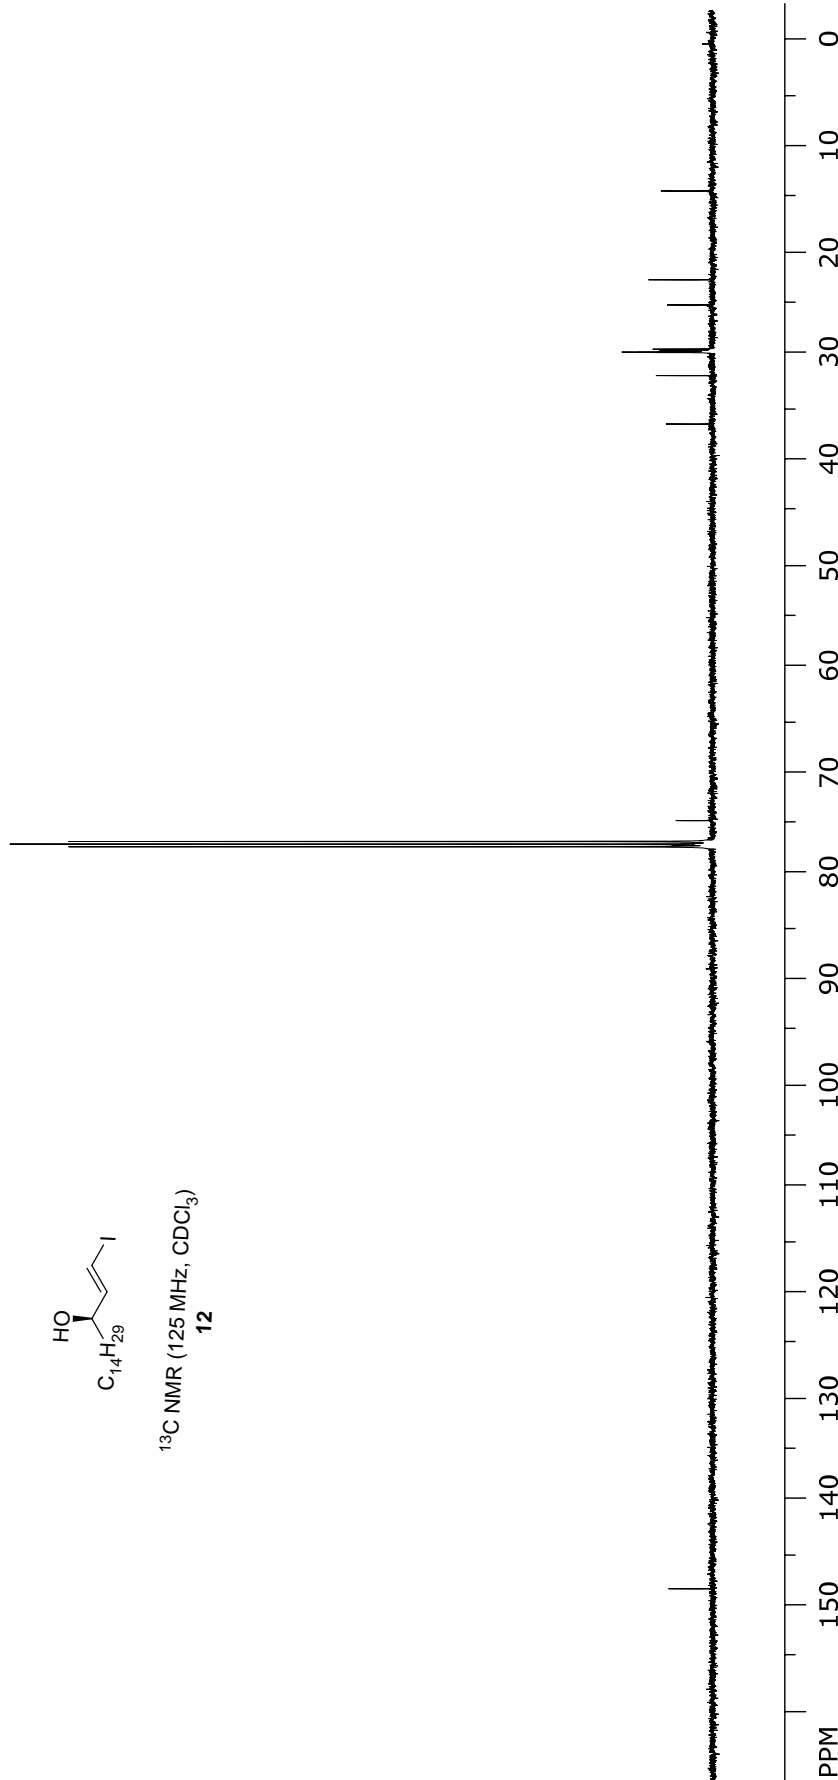

file: ... \NMR 500 3-1-2010\zh091113s2\2\fid exp: <zpgp30>  
transmitter freq.: 125.771622 MHz  
time domain size: 65536 points  
width: 31250.00 Hz = 248.4662 ppm = 0.476837 Hz/pt  
number of scans: 1024

freq. of 0 ppm: 125.757795 MHz  
processed size: 32768 complex points  
LB: 1.000 GF: 0.0000  
Hz/cm: 858.139 ppm/cm: 6.82299

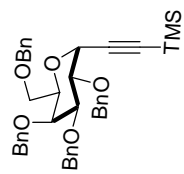

<sup>1</sup>H NMR (500 MHz, CDCl<sub>3</sub>)  
20

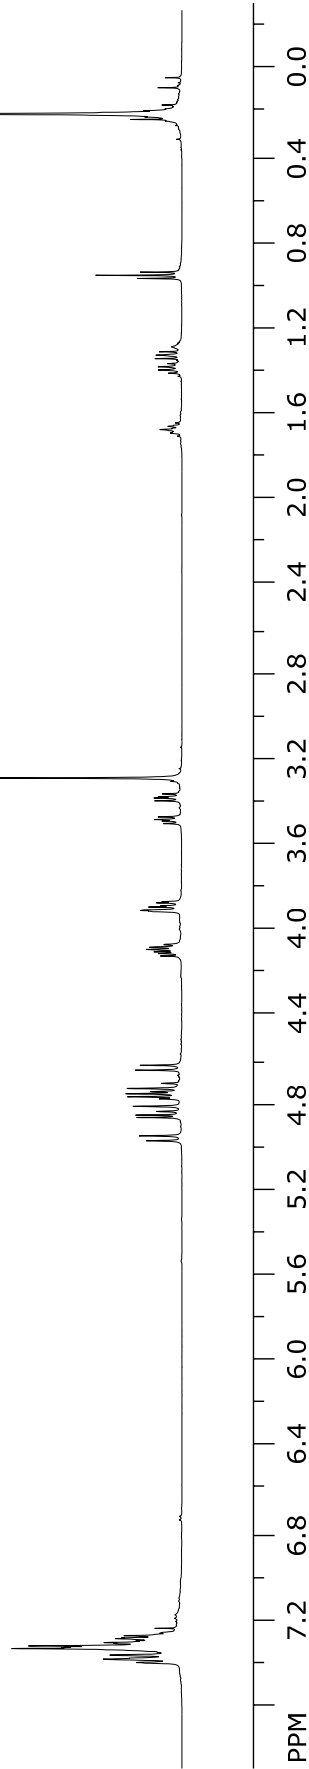

file: ... \NMR 500 3-1-2010\zh091103s2\1\fid expt: <zg30>  
 transmitter freq.: 500.133089 MHz  
 time domain size: 65536 points  
 width: 10330.58 Hz = 20.6557 ppm = 0.157632 Hz/pt  
 number of scans: 16

freq. of 0 ppm: 500.130015 MHz  
 processed size: 32768 complex points  
 LB: 0.300 GF: 0.0000  
 Hz/cm: 164.106 ppm/cm: 0.32812

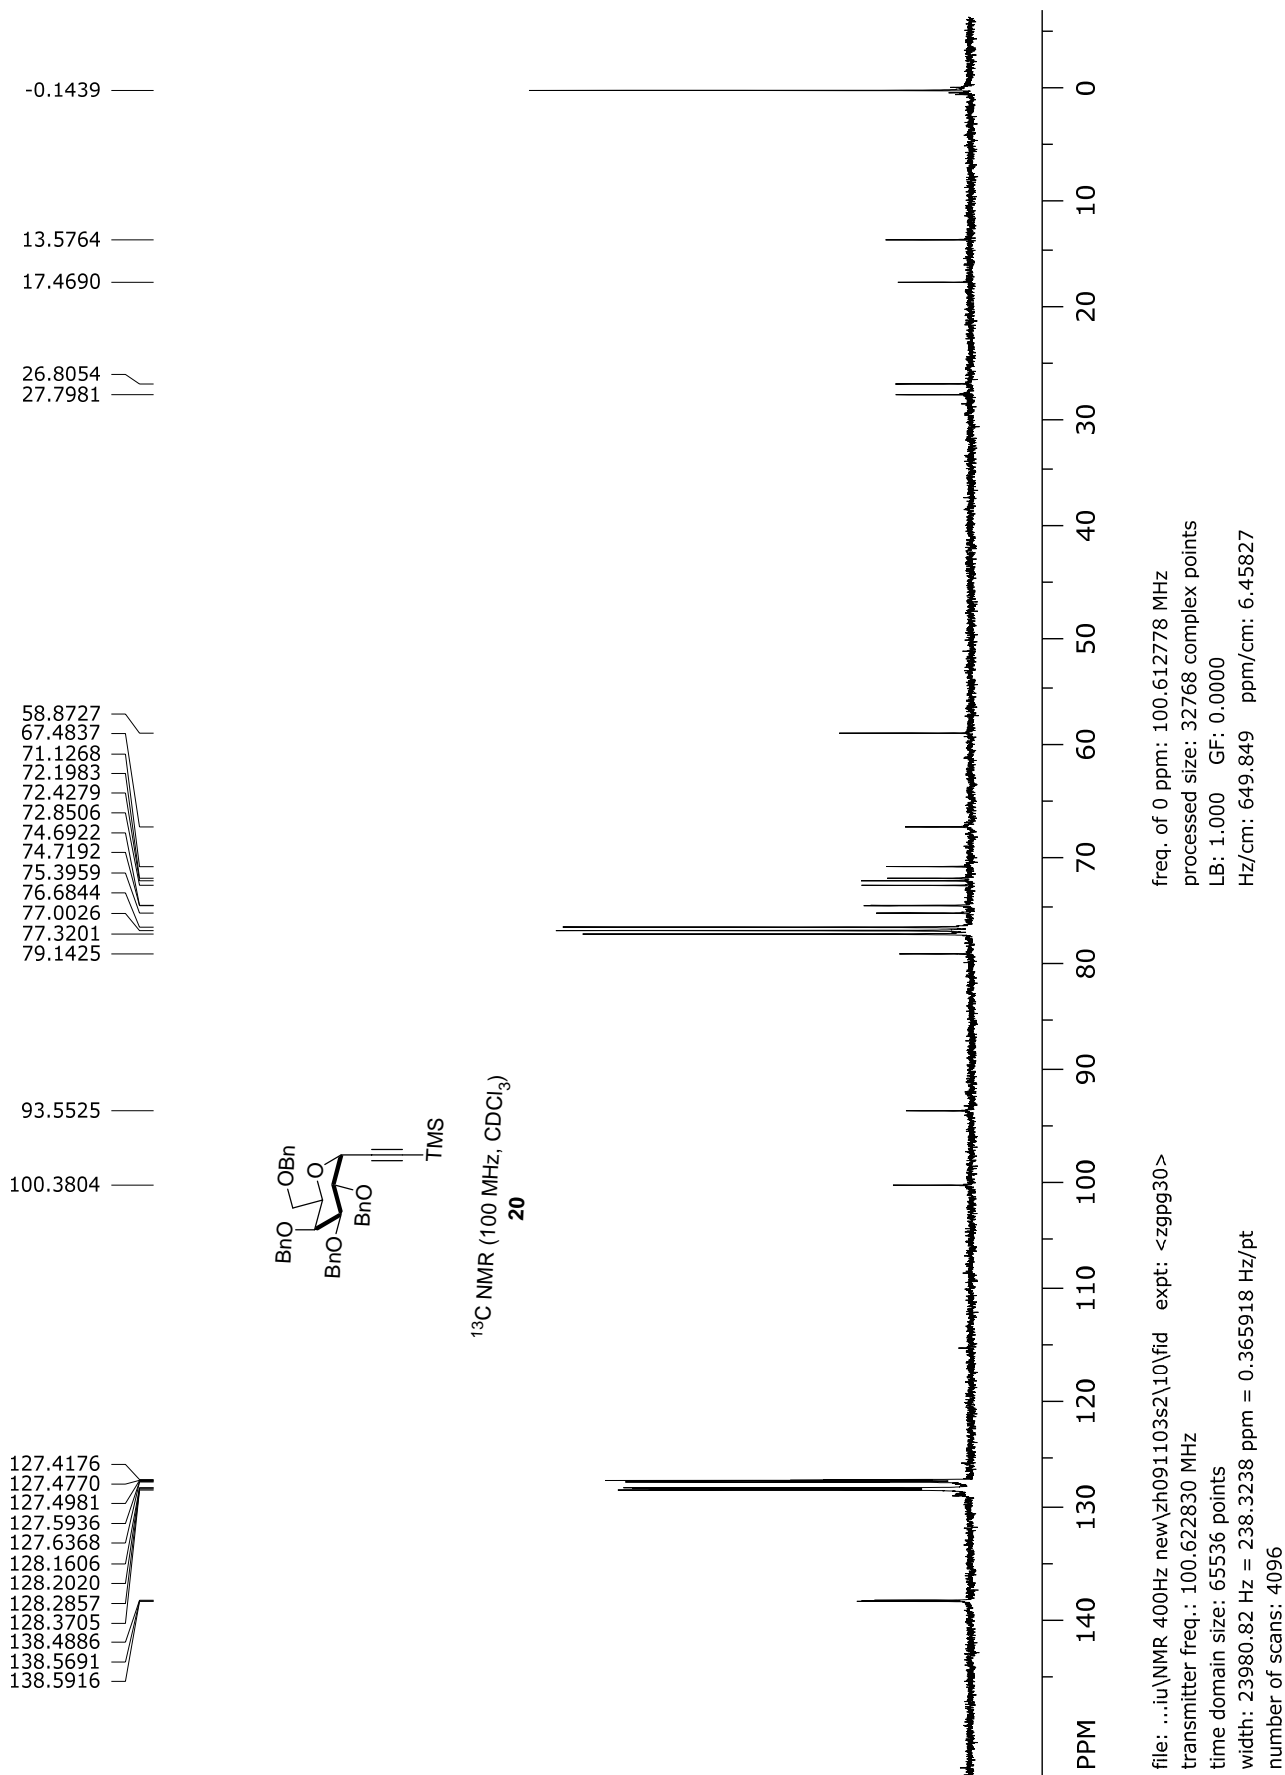

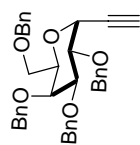

<sup>1</sup>H NMR (500 MHz, CDCl<sub>3</sub>)  
11

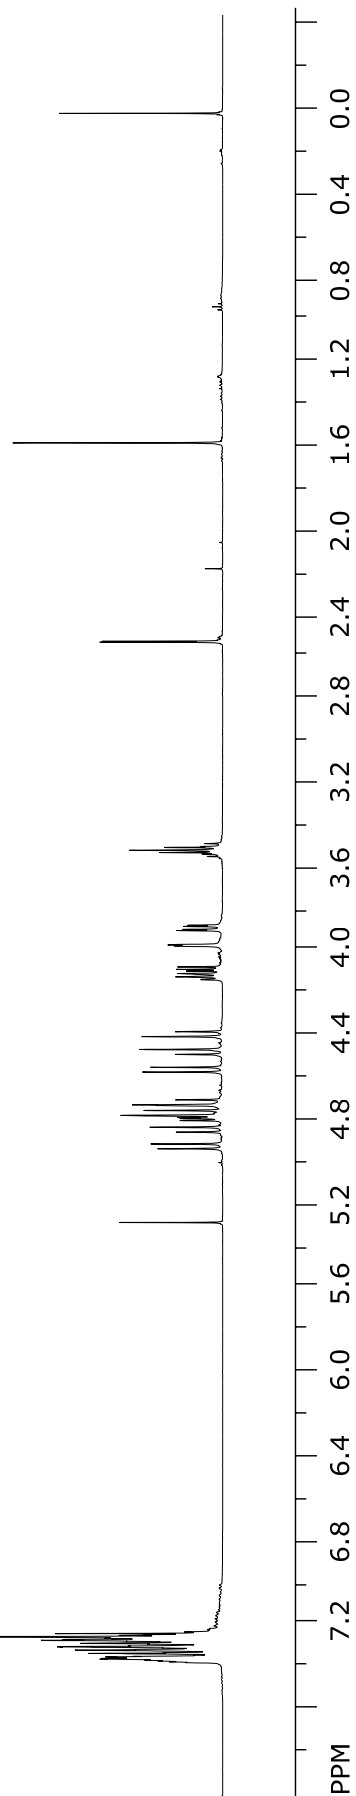

file: ...Zheng Liu\NMR 500\zh091114s2\1\fid exp: <zg30>  
 transmitter freq.: 500.133089 MHz  
 time domain size: 65536 points  
 width: 10330.58 Hz = 20.6557 ppm = 0.157632 Hz/pt  
 number of scans: 16

freq. of 0 ppm: 500.130015 MHz  
 processed size: 32768 complex points  
 LB: 0.300 GF: 0.0000  
 Hz/cm: 170.334 ppm/cm: 0.34058

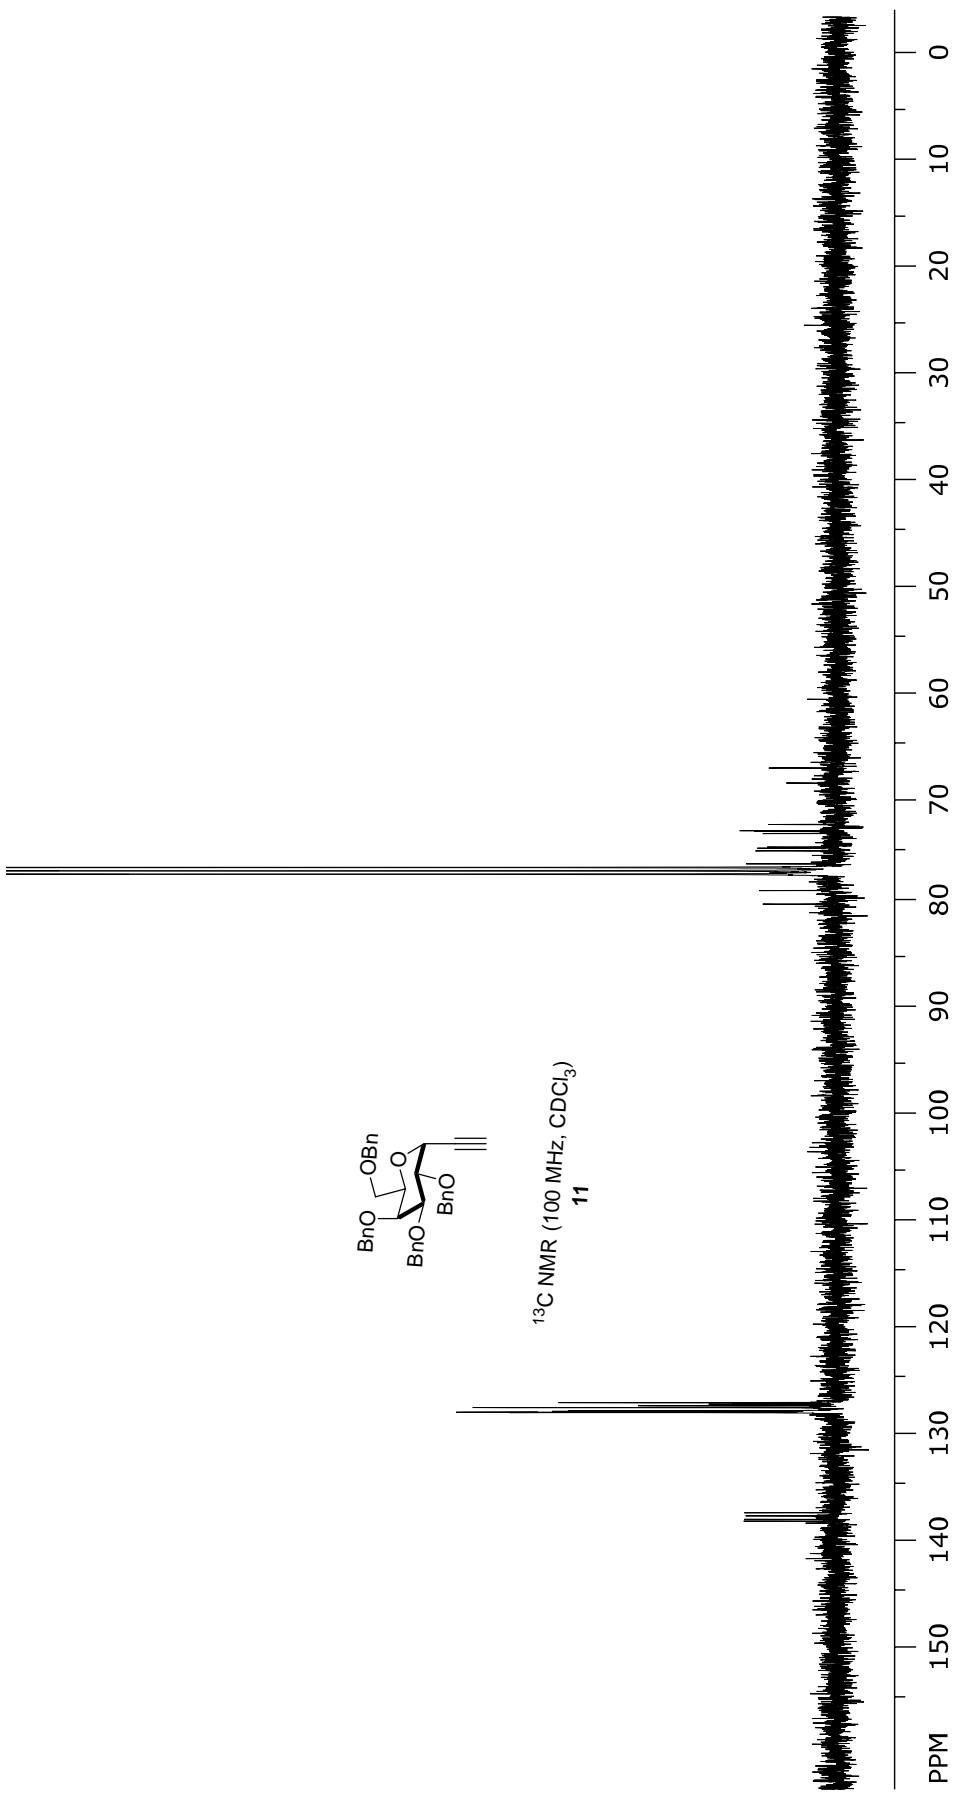

file: I:\400 MHz\zh091114s2\10\fid exp: <zpgg30>  
 transmitter freq.: 100.622830 MHz  
 time domain size: 65536 points  
 width: 23980.82 Hz = 238.3238 ppm = 0.365918 Hz/pt  
 number of scans: 4096

freq. of 0 ppm: 100.612773 MHz  
 processed size: 32768 complex points  
 LB: 1.000 GF: 0.0000  
 Hz/cm: 676.484 ppm/cm: 6.72296

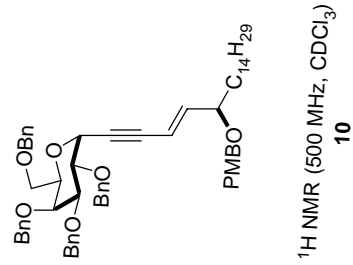

$^1H$  NMR (500 MHz,  $CDCl_3$ )

**10**

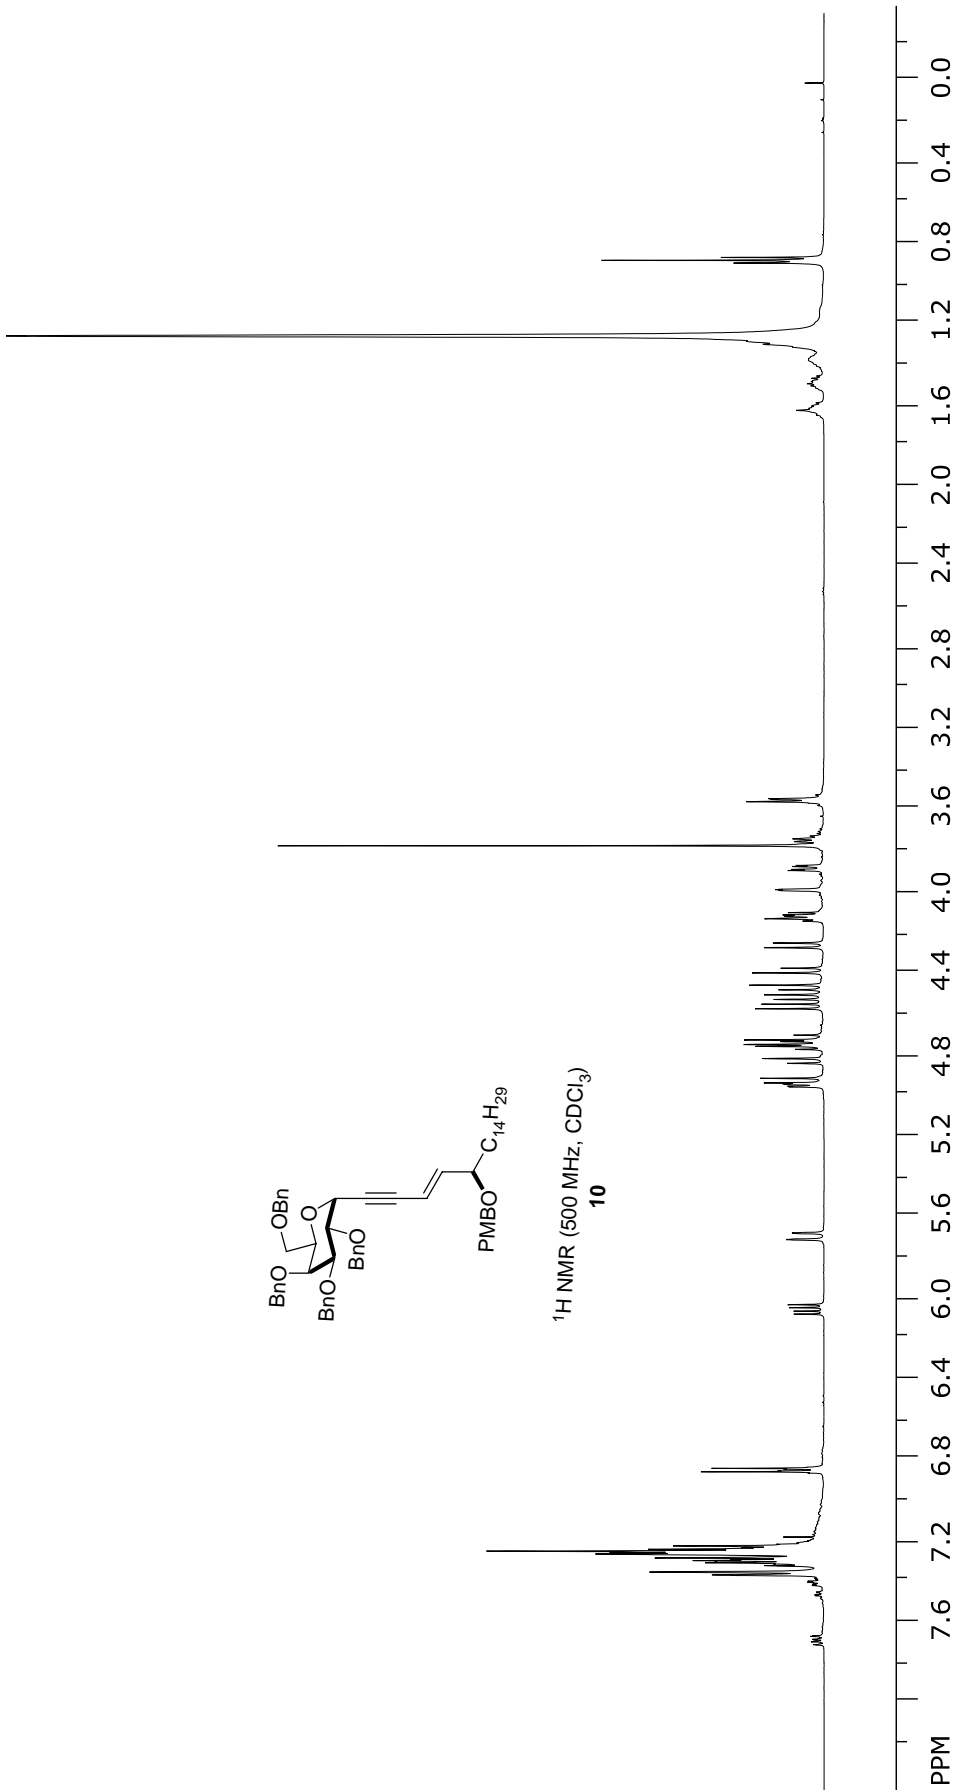

file: ...Zheng Liu\NMR 500\zh091116s3\1\fid expt: <zg30>  
 transmitter freq.: 500.133089 MHz  
 time domain size: 65536 points  
 width: 10330.58 Hz = 20.6557 ppm = 0.157632 Hz/pt  
 number of scans: 16

freq. of 0 ppm: 500.130043 MHz  
 processed size: 32768 complex points  
 LB: 0.300 GF: 0.0000  
 Hz/cm: 176.250 ppm/cm: 0.35241

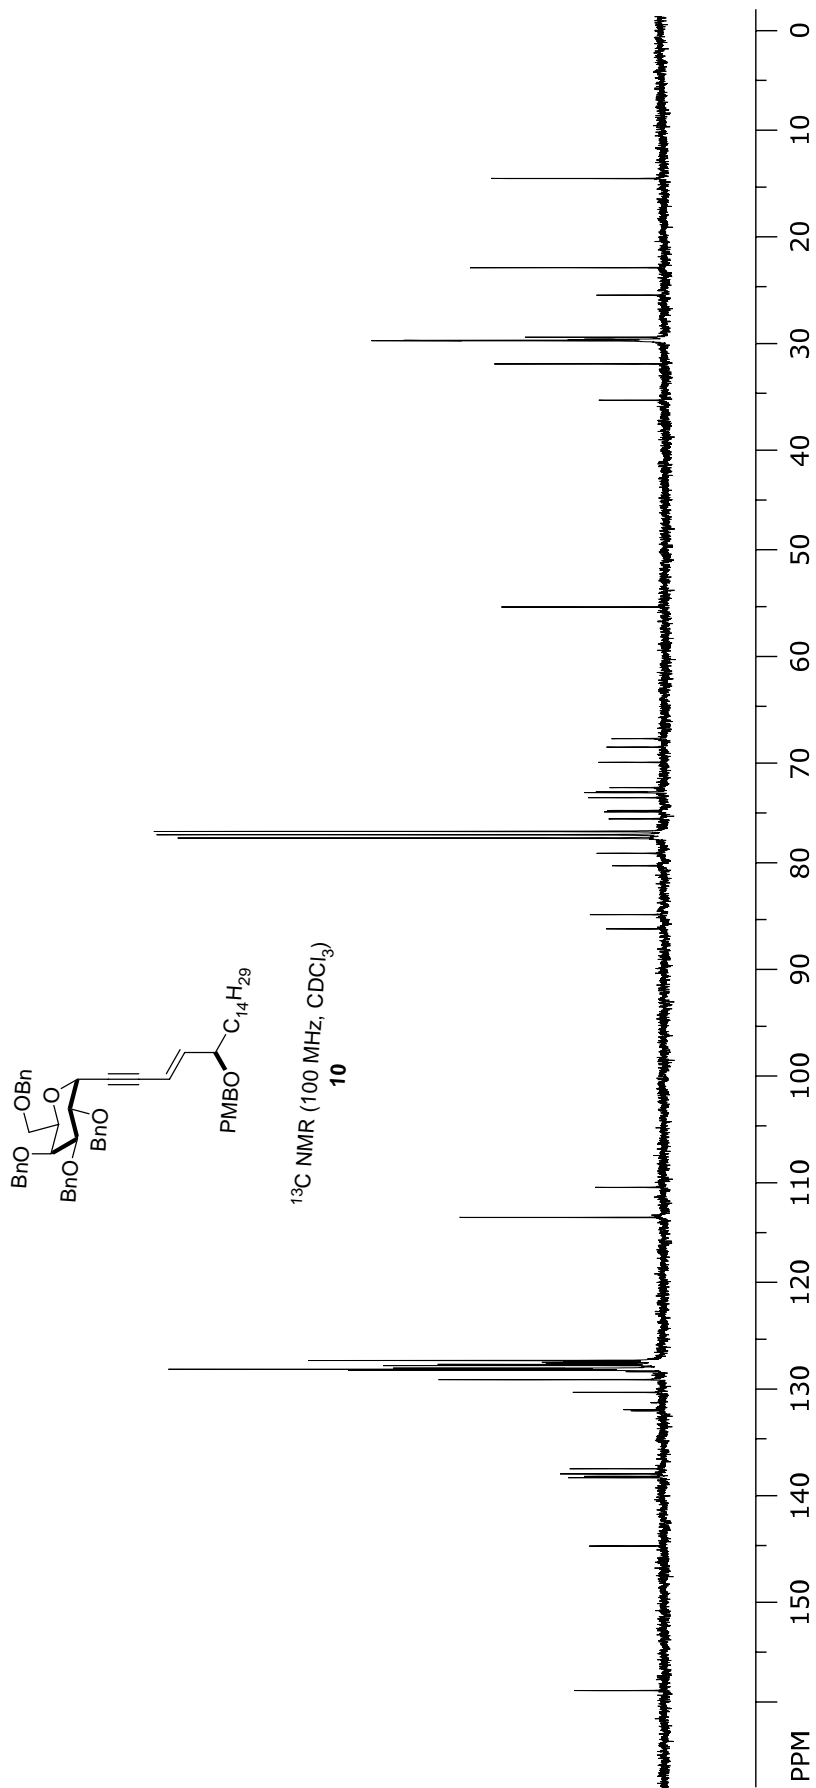

file: I:\400 MHz\zh091116s3\10\fid exp: <zpgg30>  
 transmitter freq.: 100.622830 MHz  
 time domain size: 65536 points  
 width: 23980.82 Hz = 238.3238 ppm = 0.365918 Hz/pt  
 number of scans: 4096

freq. of 0 ppm: 100.612784 MHz  
 processed size: 32768 complex points  
 LB: 1.000 GF: 0.0000  
 Hz/cm: 683.354 ppm/cm: 6.79124



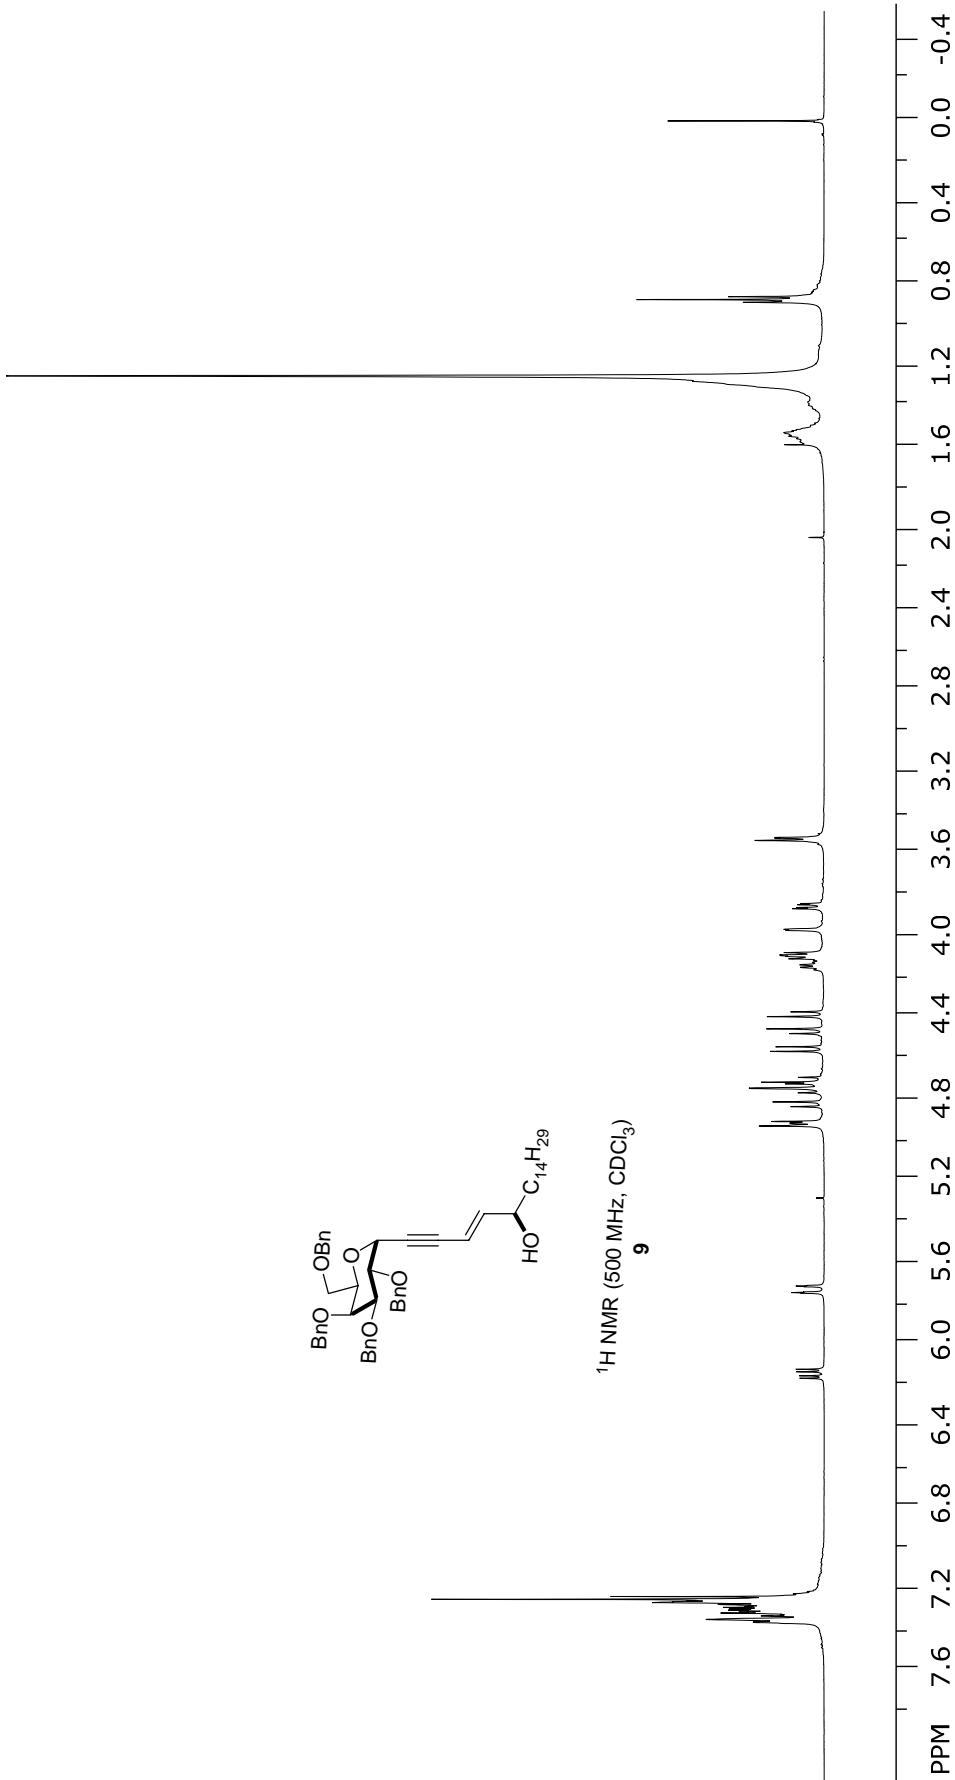

file: ... \NMR 500 3-1-2010\zh091124s3\1\fid exp: <zg30>  
 transmitter freq.: 500.133089 MHz  
 time domain size: 65536 points  
 width: 10330.58 Hz = 20.6557 ppm = 0.157632 Hz/pt  
 number of scans: 16

freq. of 0 ppm: 500.130015 MHz  
 processed size: 32768 complex points  
 LB: 0.300 GF: 0.0000  
 Hz/cm: 174.071 ppm/cm: 0.34805

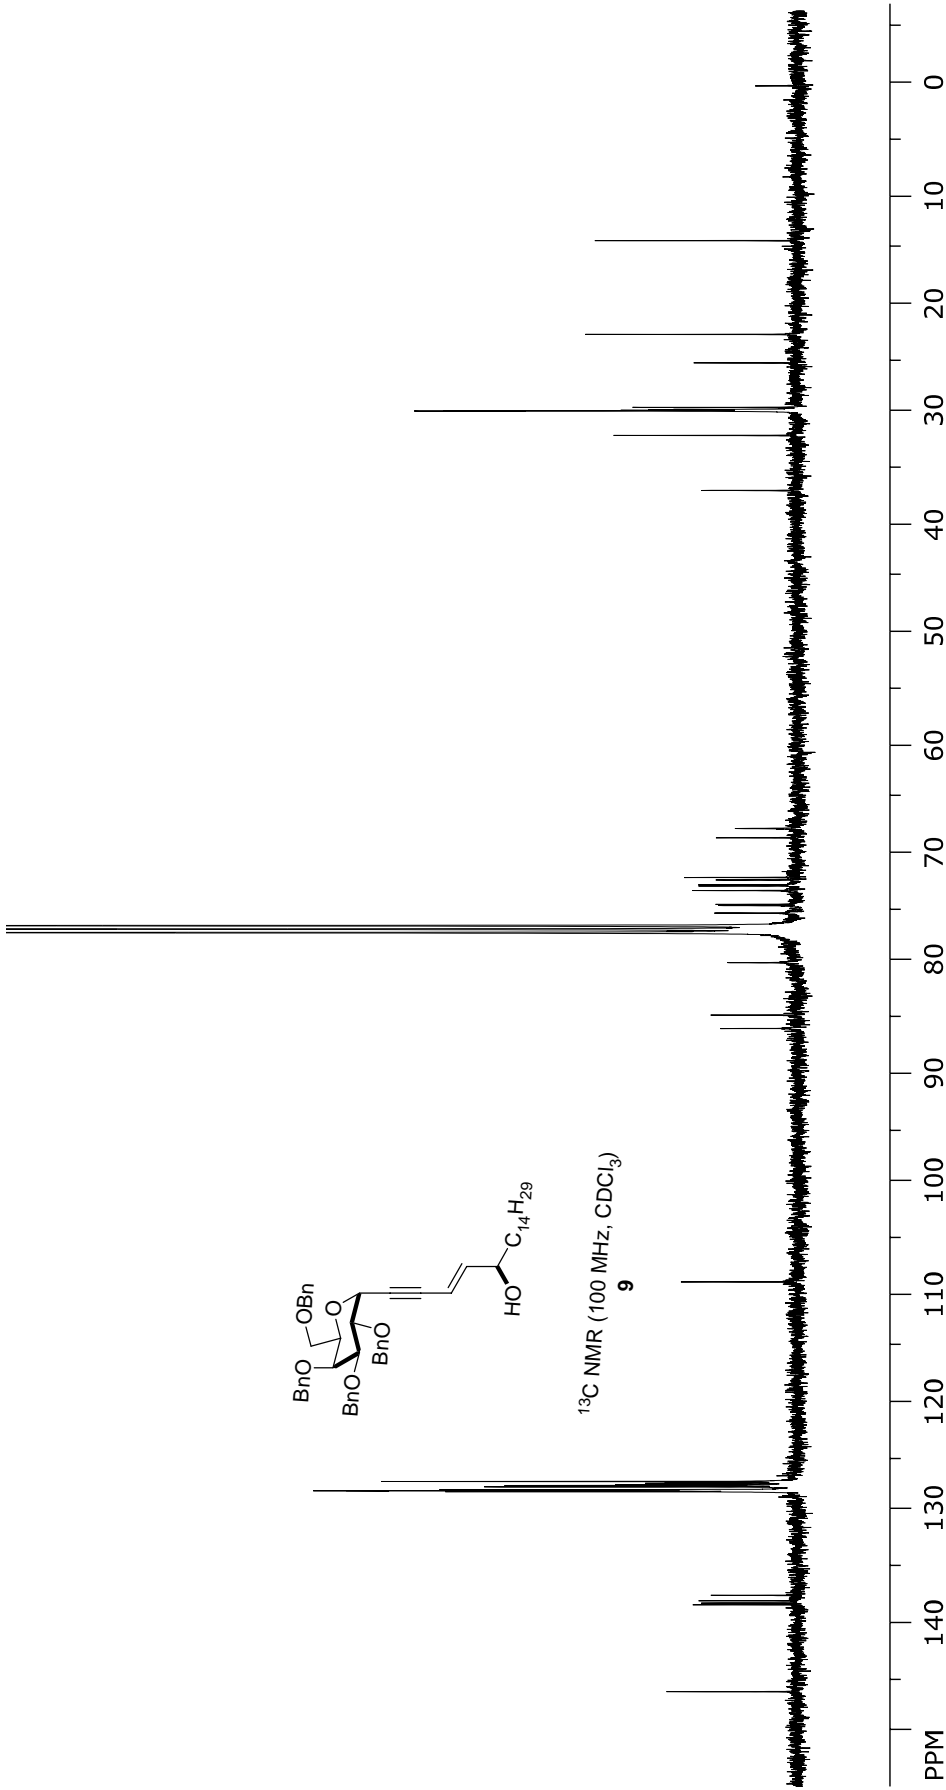

file: I:\400 MHz\zh091124s3\10\fid exp: <zpgp30>  
 transmitter freq.: 100.622830 MHz  
 time domain size: 65536 points  
 width: 23980.82 Hz = 238.3238 ppm = 0.365918 Hz/pt  
 number of scans: 4096

freq. of 0 ppm: 100.612772 MHz  
 processed size: 32768 complex points  
 LB: 1.000 GF: 0.0000  
 Hz/cm: 652.701 ppm/cm: 6.48661

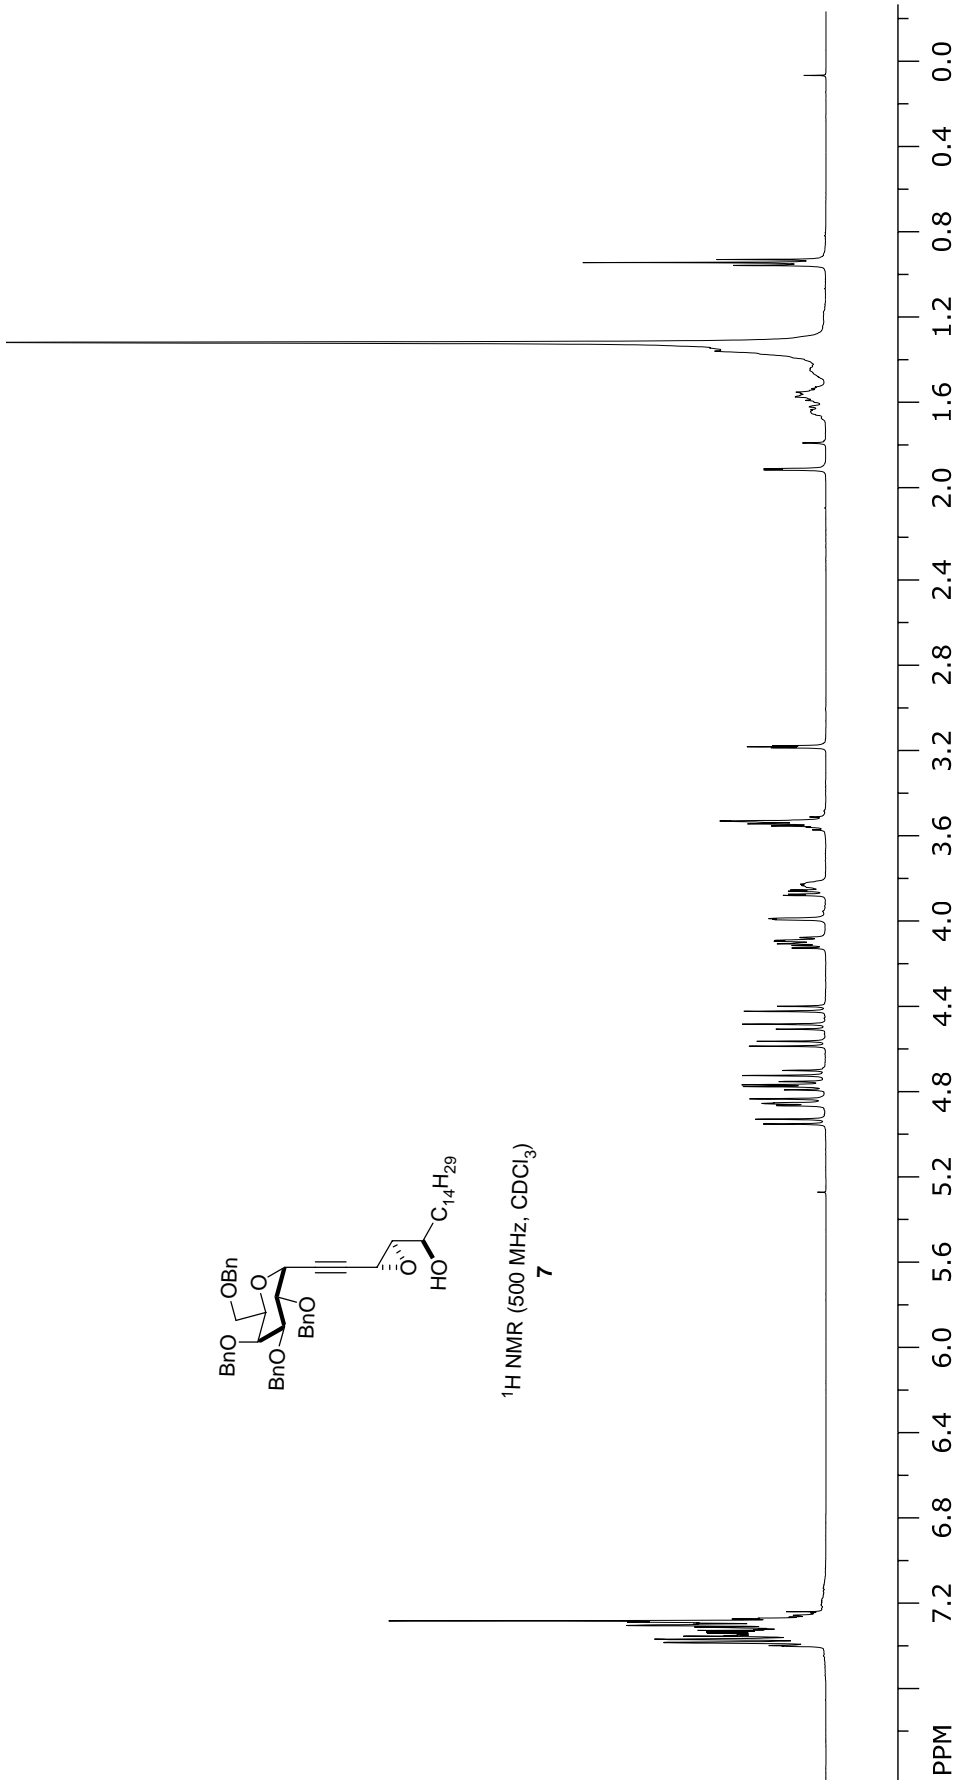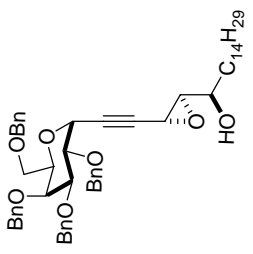

<sup>1</sup>H NMR (500 MHz, CDCl<sub>3</sub>)  
7

file: ... \NMR 500 3-1-2010\zh091216s2\1\fid exp: <zg30>  
 transmitter freq.: 500.133089 MHz  
 time domain size: 65536 points  
 width: 10330.58 Hz = 20.6557 ppm = 0.157632 Hz/pt  
 number of scans: 16

freq. of 0 ppm: 500.130015 MHz  
 processed size: 32768 complex points  
 LB: 0.300 GF: 0.0000  
 Hz/cm: 166.286 ppm/cm: 0.33248

137.4193  
 127.6300  
 127.7045  
 127.7441  
 127.8824  
 128.1614  
 128.1971  
 128.2732  
 128.3416  
 137.7531  
 138.1744  
 138.4166

84.3152

79.4129  
 79.4129  
 77.3215  
 77.0034  
 76.6851  
 75.1560  
 74.7999  
 74.5202  
 73.3961  
 72.9839  
 72.6510  
 68.4669  
 67.8451  
 67.2940  
 62.4201

41.7943

33.1024  
 31.8625  
 29.6364  
 29.6019  
 29.5691  
 29.4914  
 29.3025  
 25.2435  
 22.6384  
 14.0910

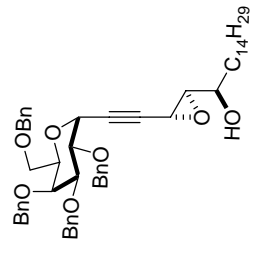

<sup>13</sup>C NMR (100 MHz, CDCl<sub>3</sub>)  
 7

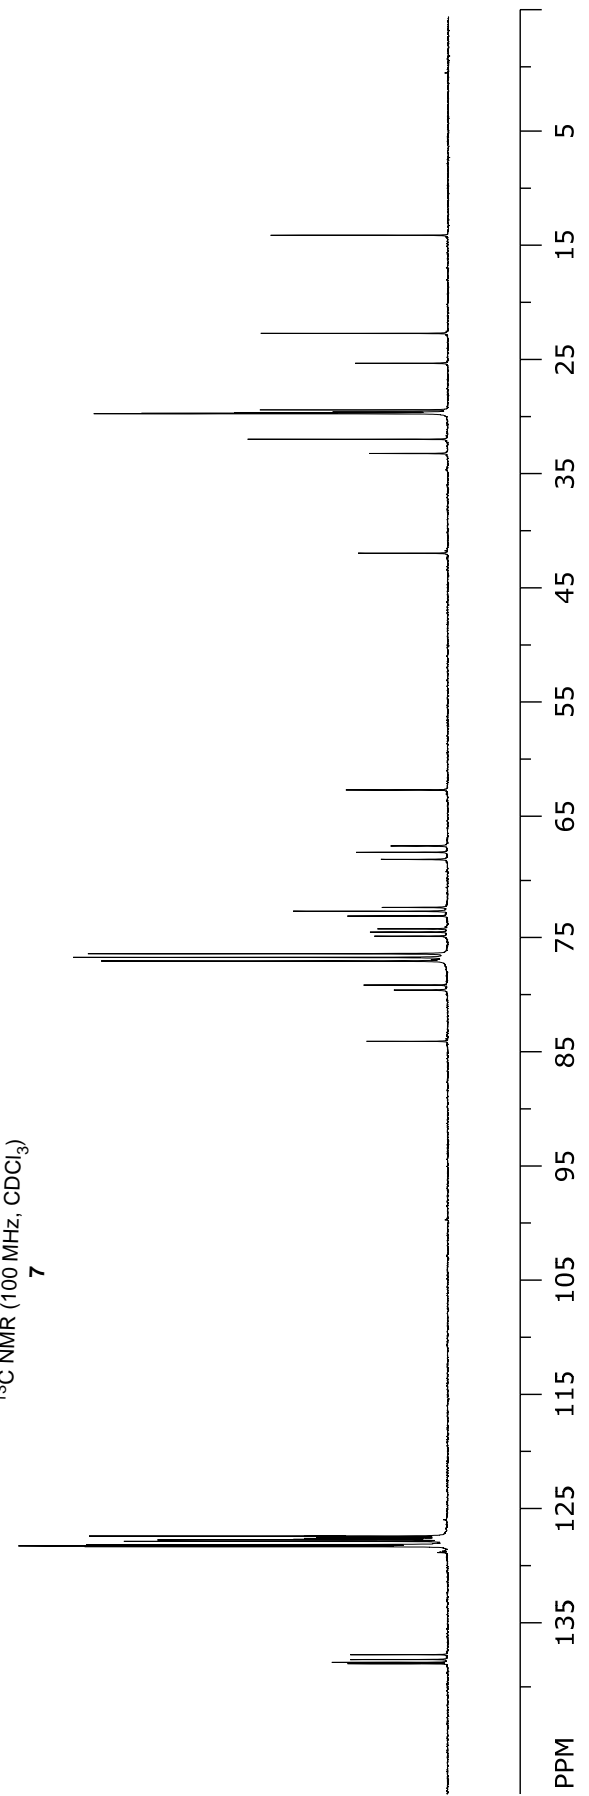

file: E:\NMR 400\zh091216s2\10\fid exp: <zpgg30>  
 transmitter freq.: 100.622830 MHz  
 time domain size: 65536 points  
 width: 23980.82 Hz = 238.3238 ppm = 0.365918 Hz/pt  
 number of scans: 4096

freq. of 0 ppm: 100.612782 MHz  
 processed size: 32768 complex points  
 LB: 1.000 GF: 0.0000  
 Hz/cm: 623.104 ppm/cm: 6.19247

127.5480  
127.5754  
127.6711  
127.7590  
127.8331  
127.8719  
128.0104  
128.2910  
128.3266  
128.4029  
128.4714

79.9799

62.5494  
67.4229  
67.9760  
68.5974  
72.7807  
73.1136  
73.5252  
74.6518  
74.9287  
75.2867

41.9249

33.2310  
31.9911  
29.7660  
29.7317  
29.6982  
29.6209  
29.4319  
25.3731  
22.7667  
14.2178

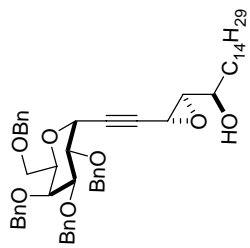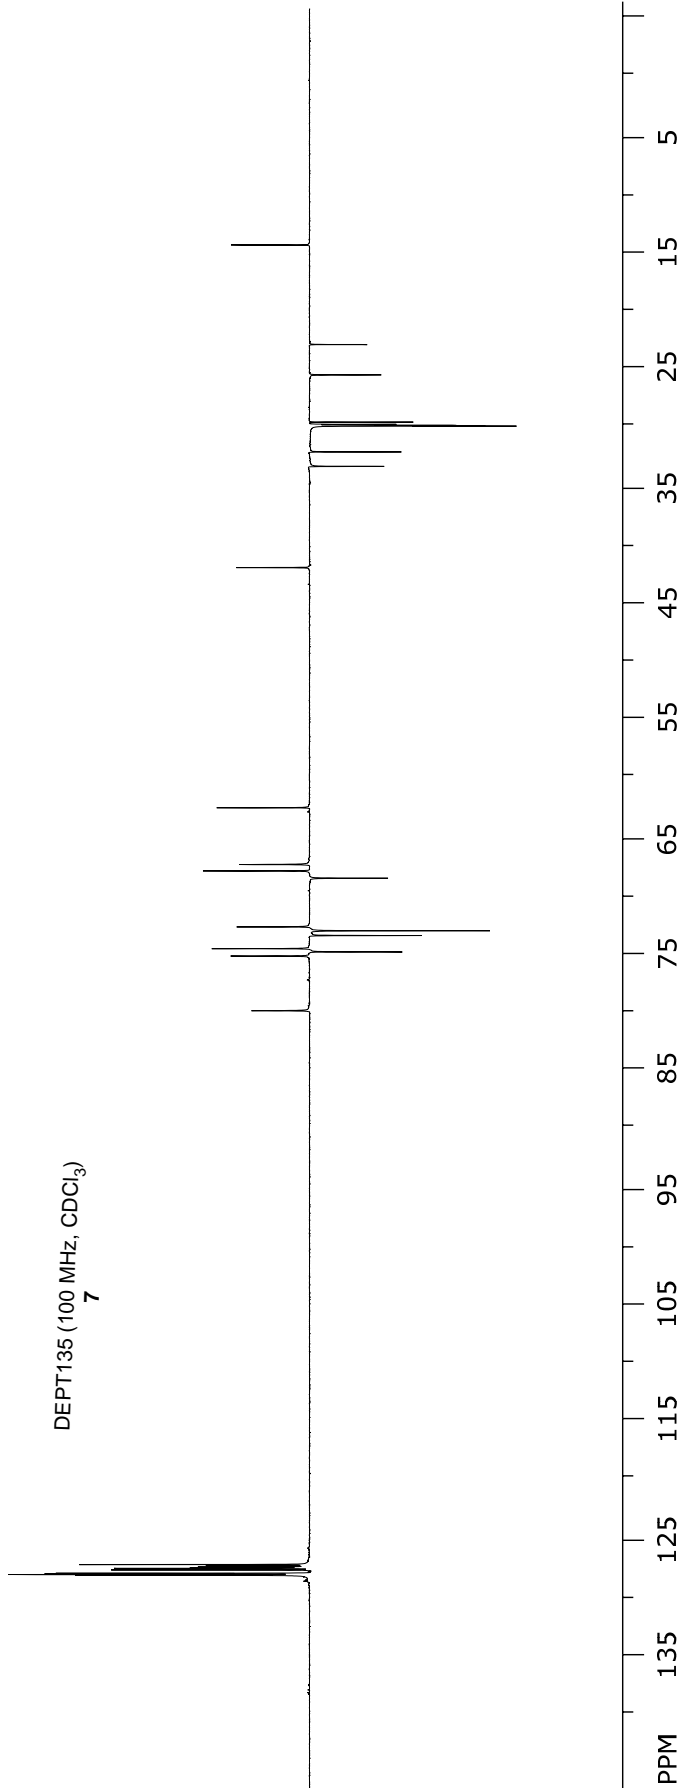

file: E:\NMR 400\zh091216s2\14\fid exp: <dept135>  
transmitter freq.: 100.622830 MHz  
time domain size: 65536 points  
width: 23980.82 Hz = 238.3238 ppm = 0.365918 Hz/pt  
number of scans: 4096

freq. of 0 ppm: 100.612769 MHz  
processed size: 32768 complex points  
LB: 1.000 GF: 0.0000  
Hz/cm: 615.875 ppm/cm: 6.12063

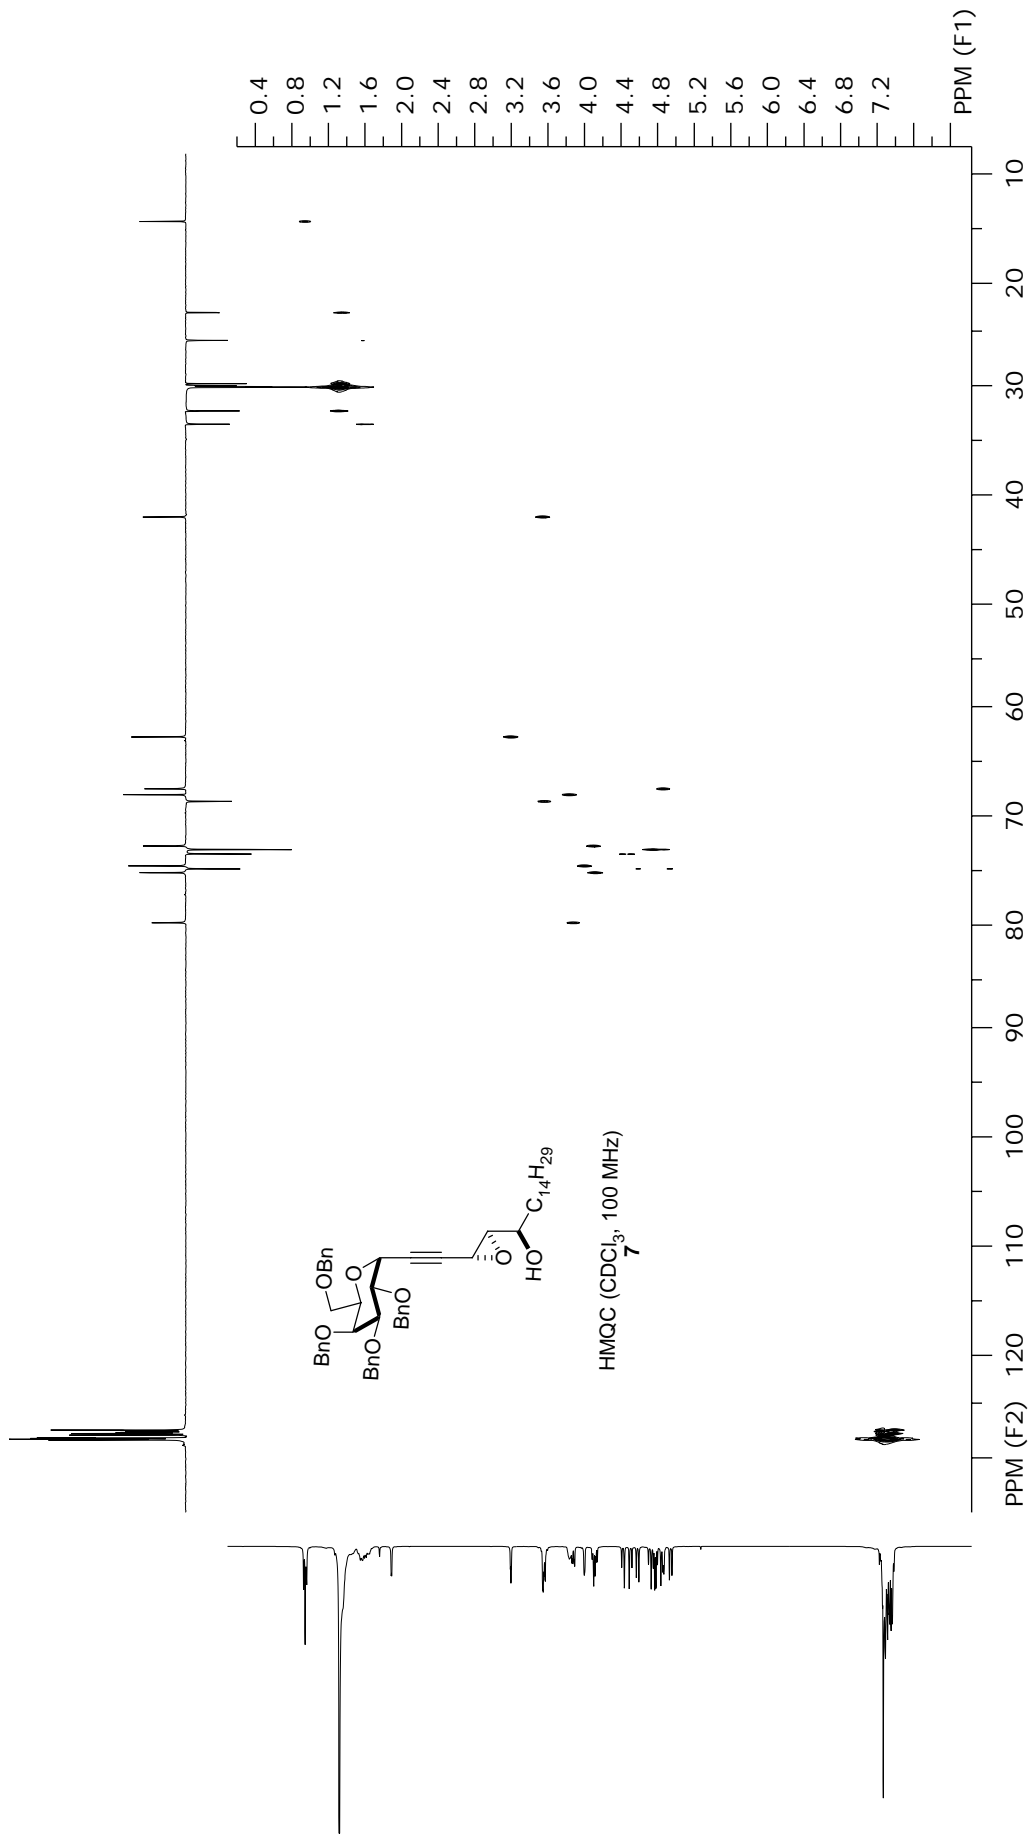

file: E:\NMR 400\zh091216s2\16\ser  
 expt: <hxcoqf>  
 transmitter freq: 100.619968 MHz  
 time domain size: 4096 by 128 points  
 width (F2): 12820.51 Hz = 127.4152 ppm = 3.1300 Hz/pt  
 number of scans: 64

F2: freq. of 0 ppm: 100.6127690 MHz  
 processed size: 2048 complex points  
 window function: Sine Squared  
 shift: 90.0 degrees  
 Hz/cm: 641.026 ppm/cm: 6.37076

F1: freq. of 0 ppm: 400.1300270 MHz  
 processed size: 1024 complex points  
 window function: Sine Squared  
 shift: 90.0 degrees  
 Hz/cm: 299.043 ppm/cm: 0.74736

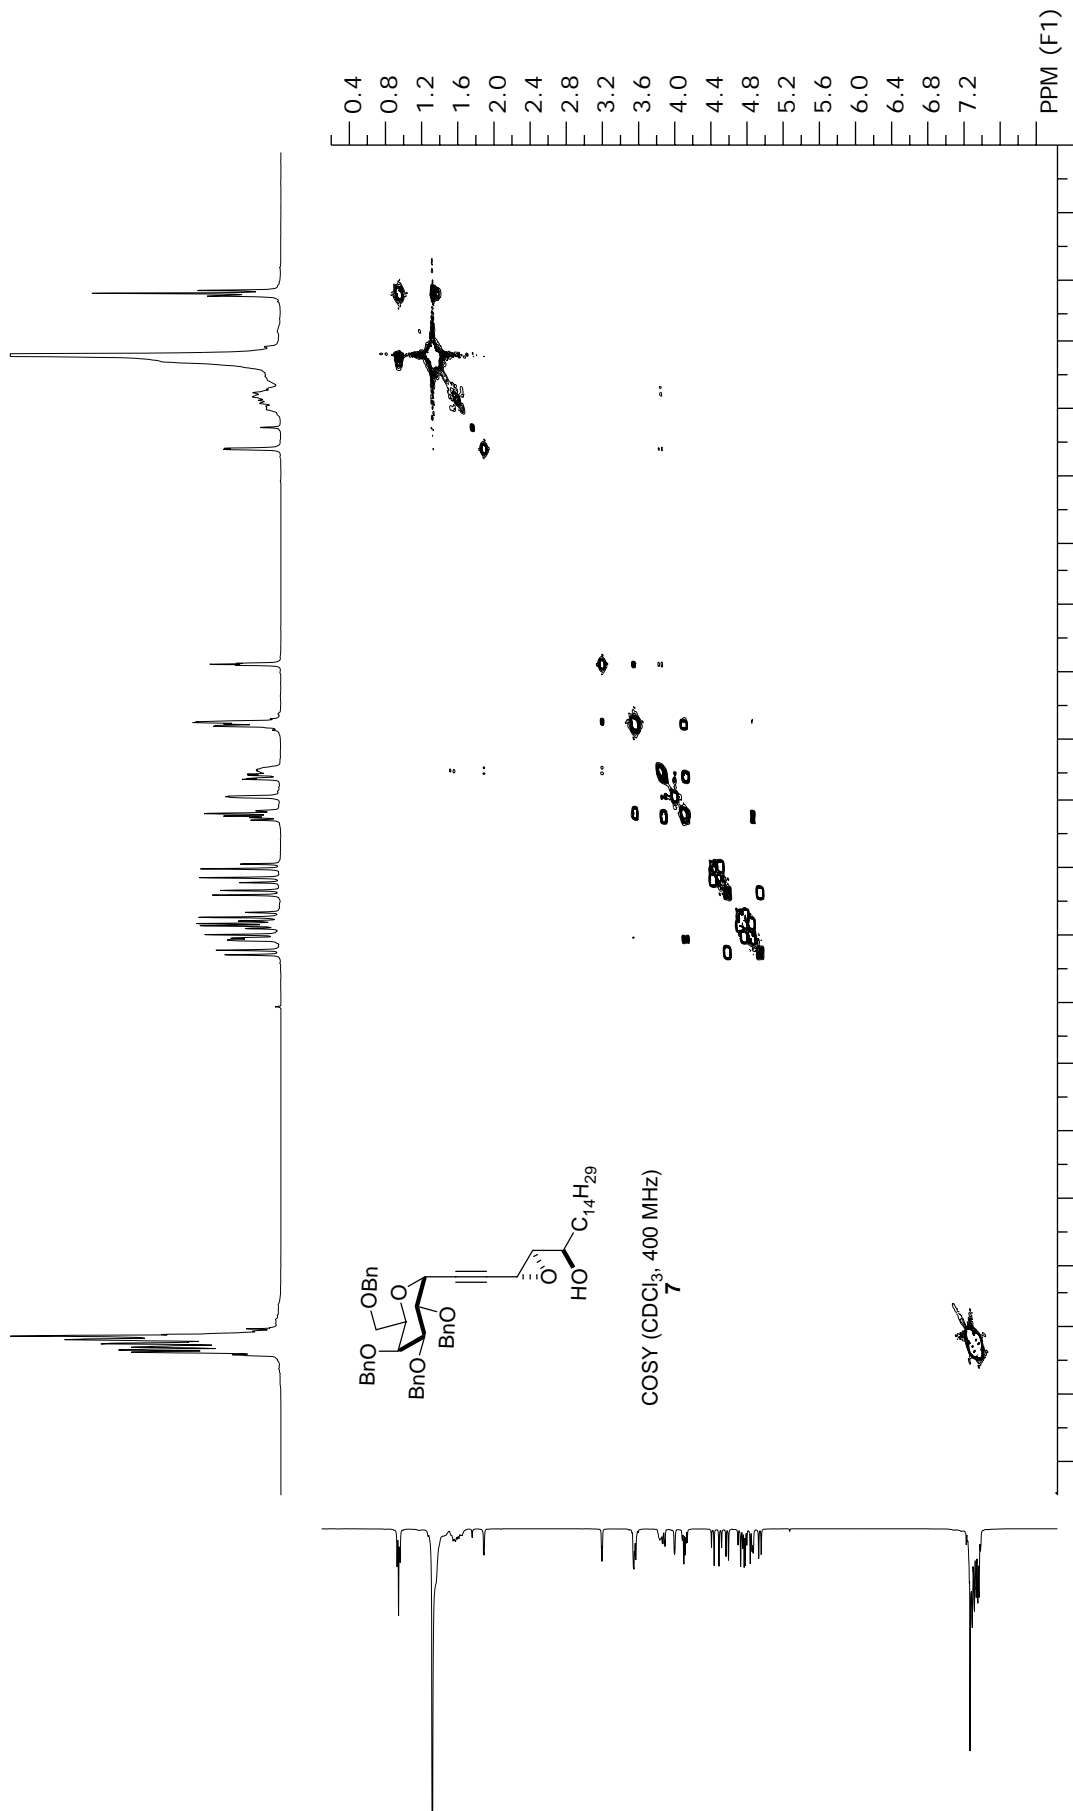

file: E:\NMR 400\zh091216s2\13\ser  
 expt: <cosyqf90>  
 transmitter freq: 400.131677 MHz  
 time domain size: 2048 by 256 points  
 width (F2): 3289.47 Hz = 8.2210 ppm = 1.6062 Hz/pt  
 number of scans: 16

F2: freq. of 0 ppm: 400.1300270 MHz  
 processed size: 1024 complex points  
 window function: Sine  
 shift: 0.0 degrees  
 Hz/cm: 164.474 ppm/cm: 0.41105

F1: freq. of 0 ppm: 400.1300270 MHz  
 processed size: 1024 complex points  
 window function: Sine  
 shift: 0.0 degrees  
 Hz/cm: 299.043 ppm/cm: 0.74736

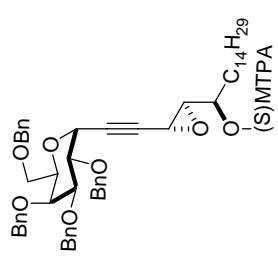

<sup>1</sup>H NMR (500 MHz, CDCl<sub>3</sub>)  
(S)-MTPA ester of 7

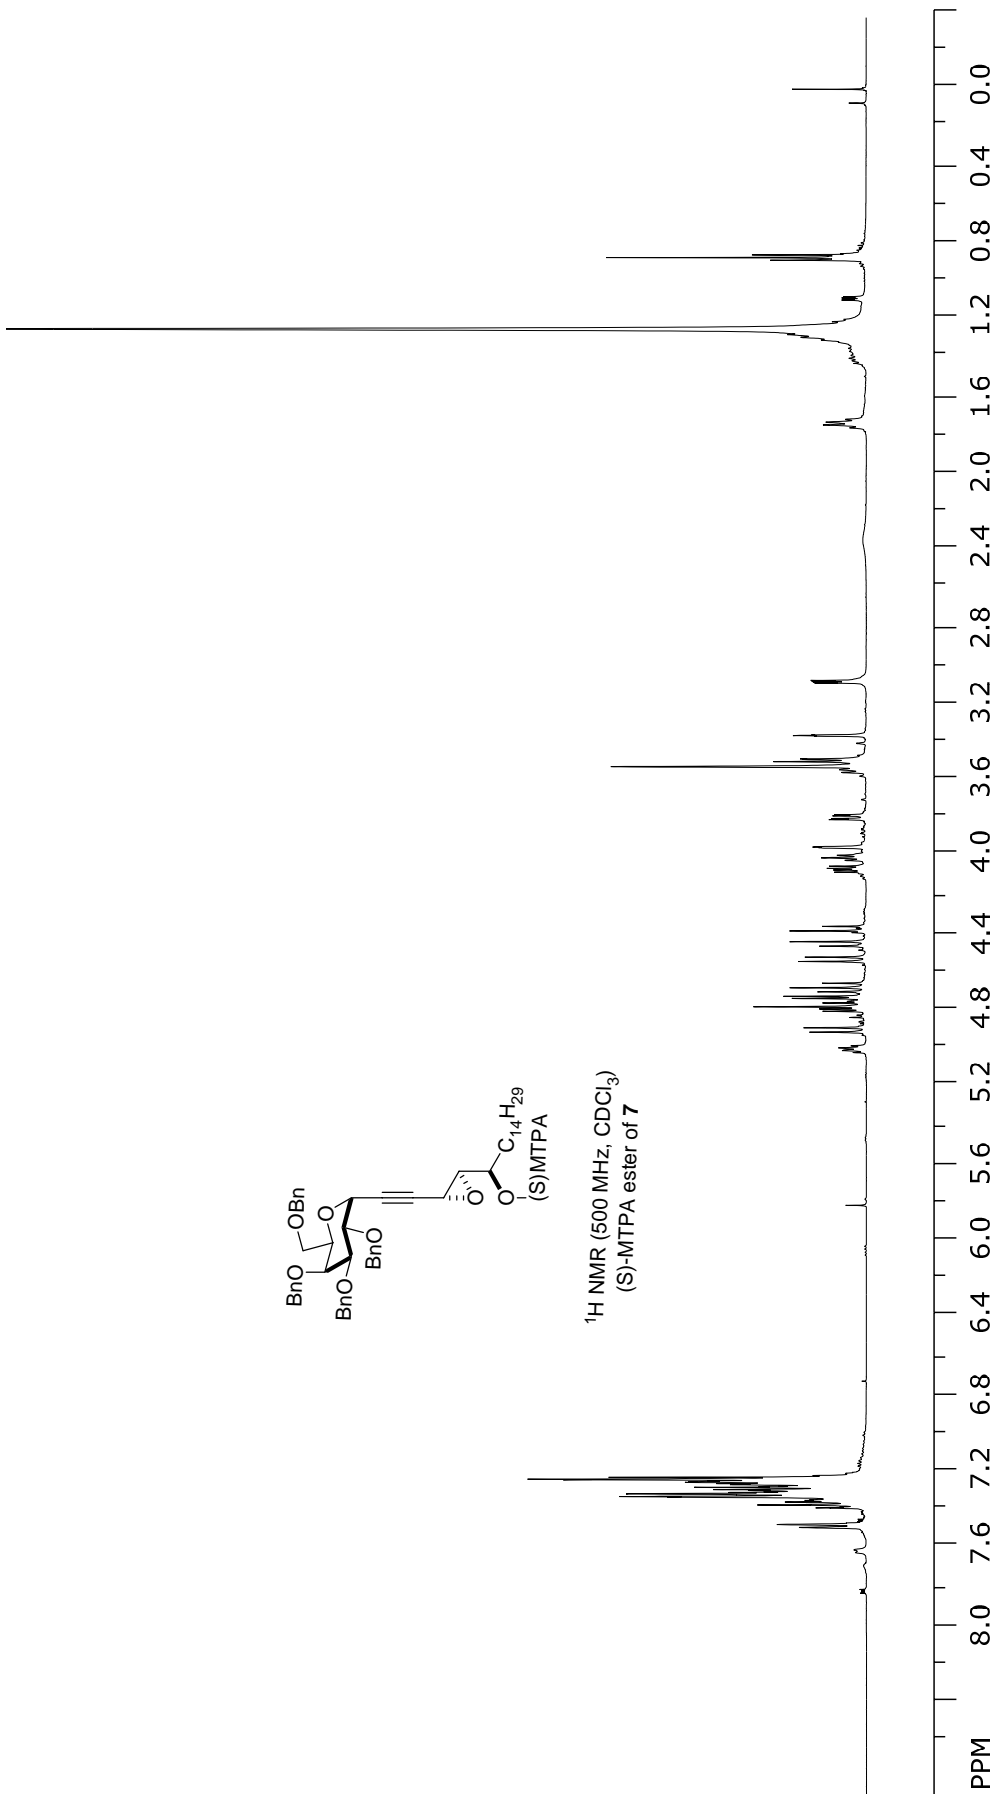

file: ... \NMR 500 3-1-2010\zh100226s2\1\fid expt: <zg30>  
 transmitter freq.: 500.133089 MHz  
 time domain size: 65536 points  
 width: 10330.58 Hz = 20.6557 ppm = 0.157632 Hz/pt  
 number of scans: 16  
 freq. of 0 ppm: 500.130018 MHz  
 processed size: 32768 complex points  
 LB: 0.300 GF: 0.0000  
 Hz/cm: 193.650 ppm/cm: 0.38720



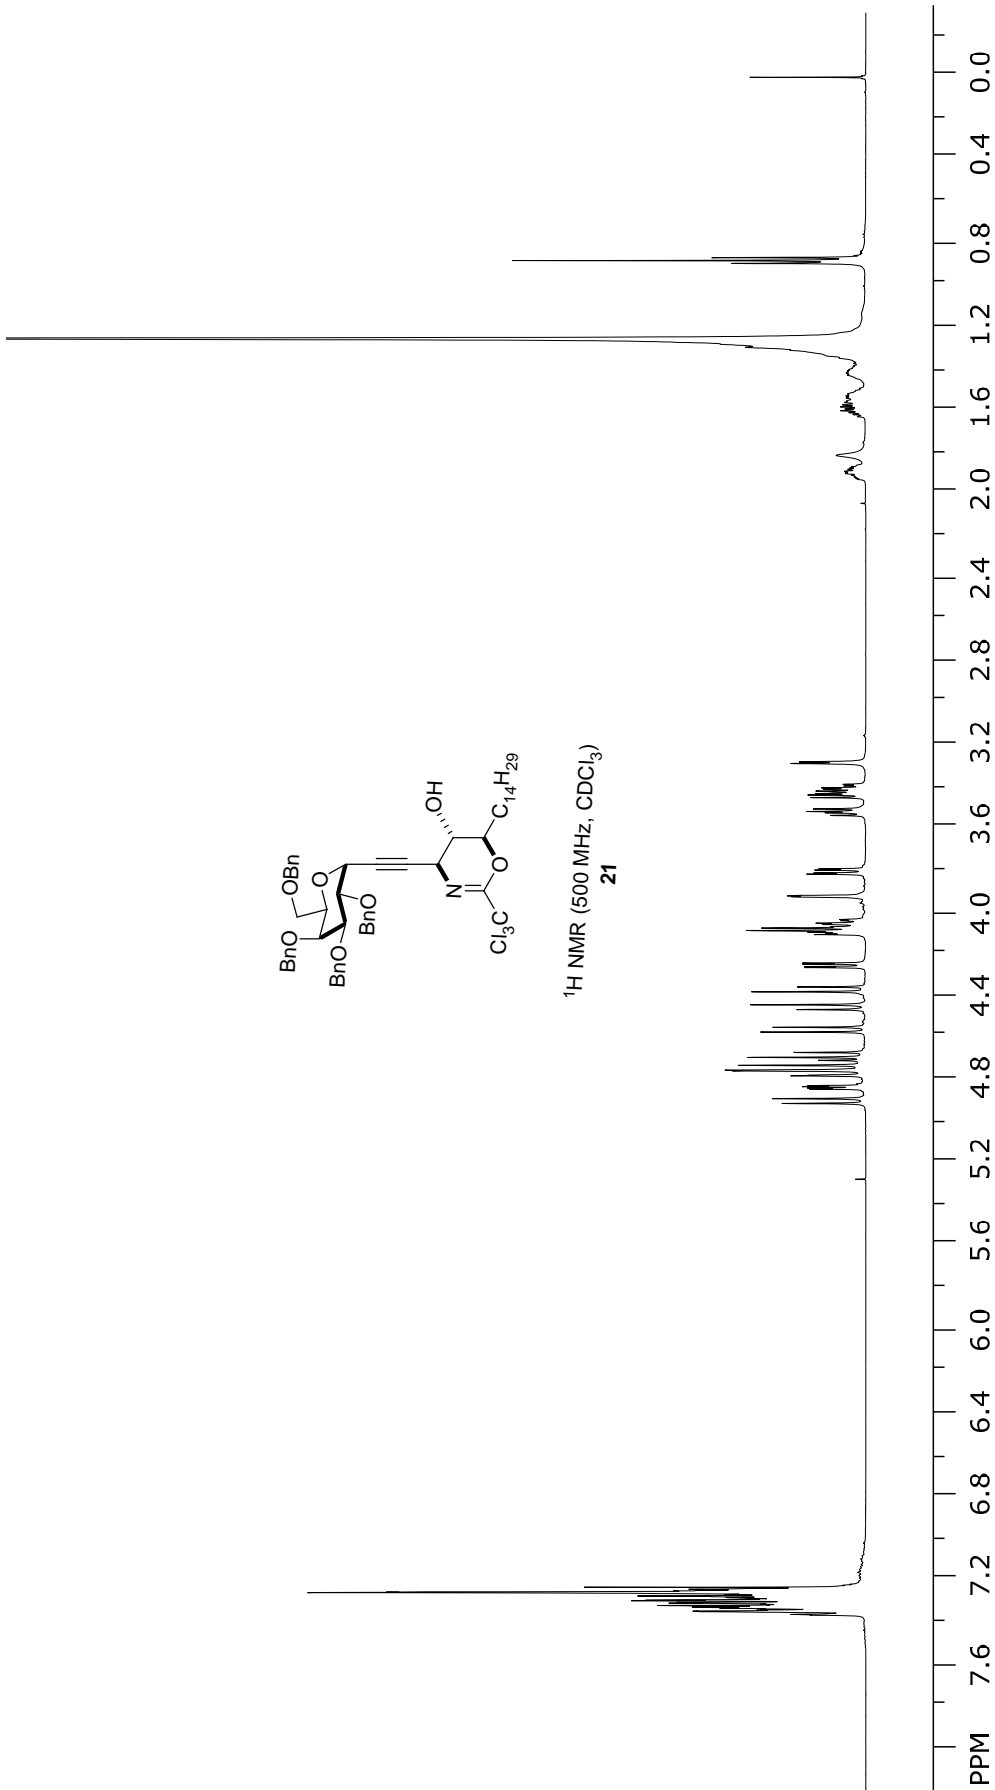

file: ... \NMR 500 3-1-2010\zh100224s2\1\fid expt: <zg30>  
 transmitter freq.: 500.133089 MHz  
 time domain size: 65536 points  
 width: 10330.58 Hz = 20.6557 ppm = 0.157632 Hz/pt  
 number of scans: 16

freq. of 0 ppm: 500.130017 MHz  
 processed size: 32768 complex points  
 LB: 0.300 GF: 0.0000  
 Hz/cm: 178.080 ppm/cm: 0.35606

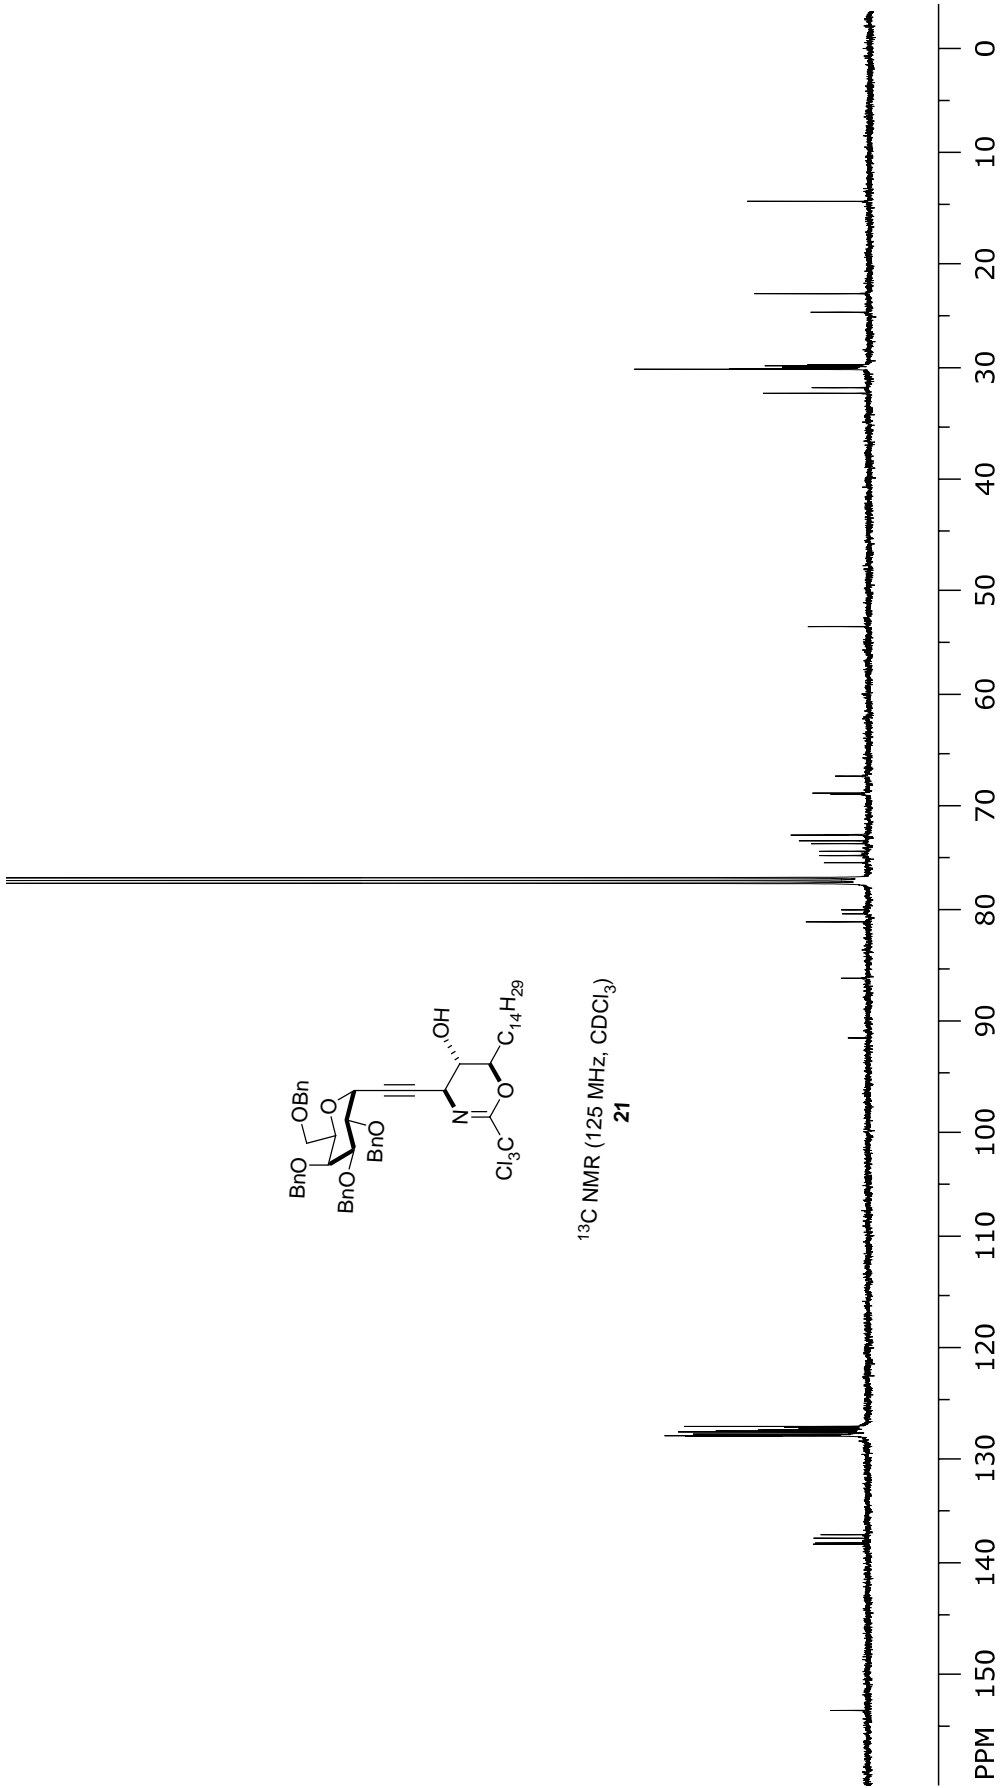

file: ... \NMR 500 3-1-2010\zh100224s2\2\fid exp: <zpgg30>  
 transmitter freq.: 125.771622 MHz  
 time domain size: 65536 points  
 width: 31250.00 Hz = 248.4662 ppm = 0.476837 Hz/pt  
 number of scans: 2048

freq. of 0 ppm: 125.757797 MHz  
 processed size: 32768 complex points  
 LB: 1.000 GF: 0.0000  
 Hz/cm: 860.533 ppm/cm: 6.84203



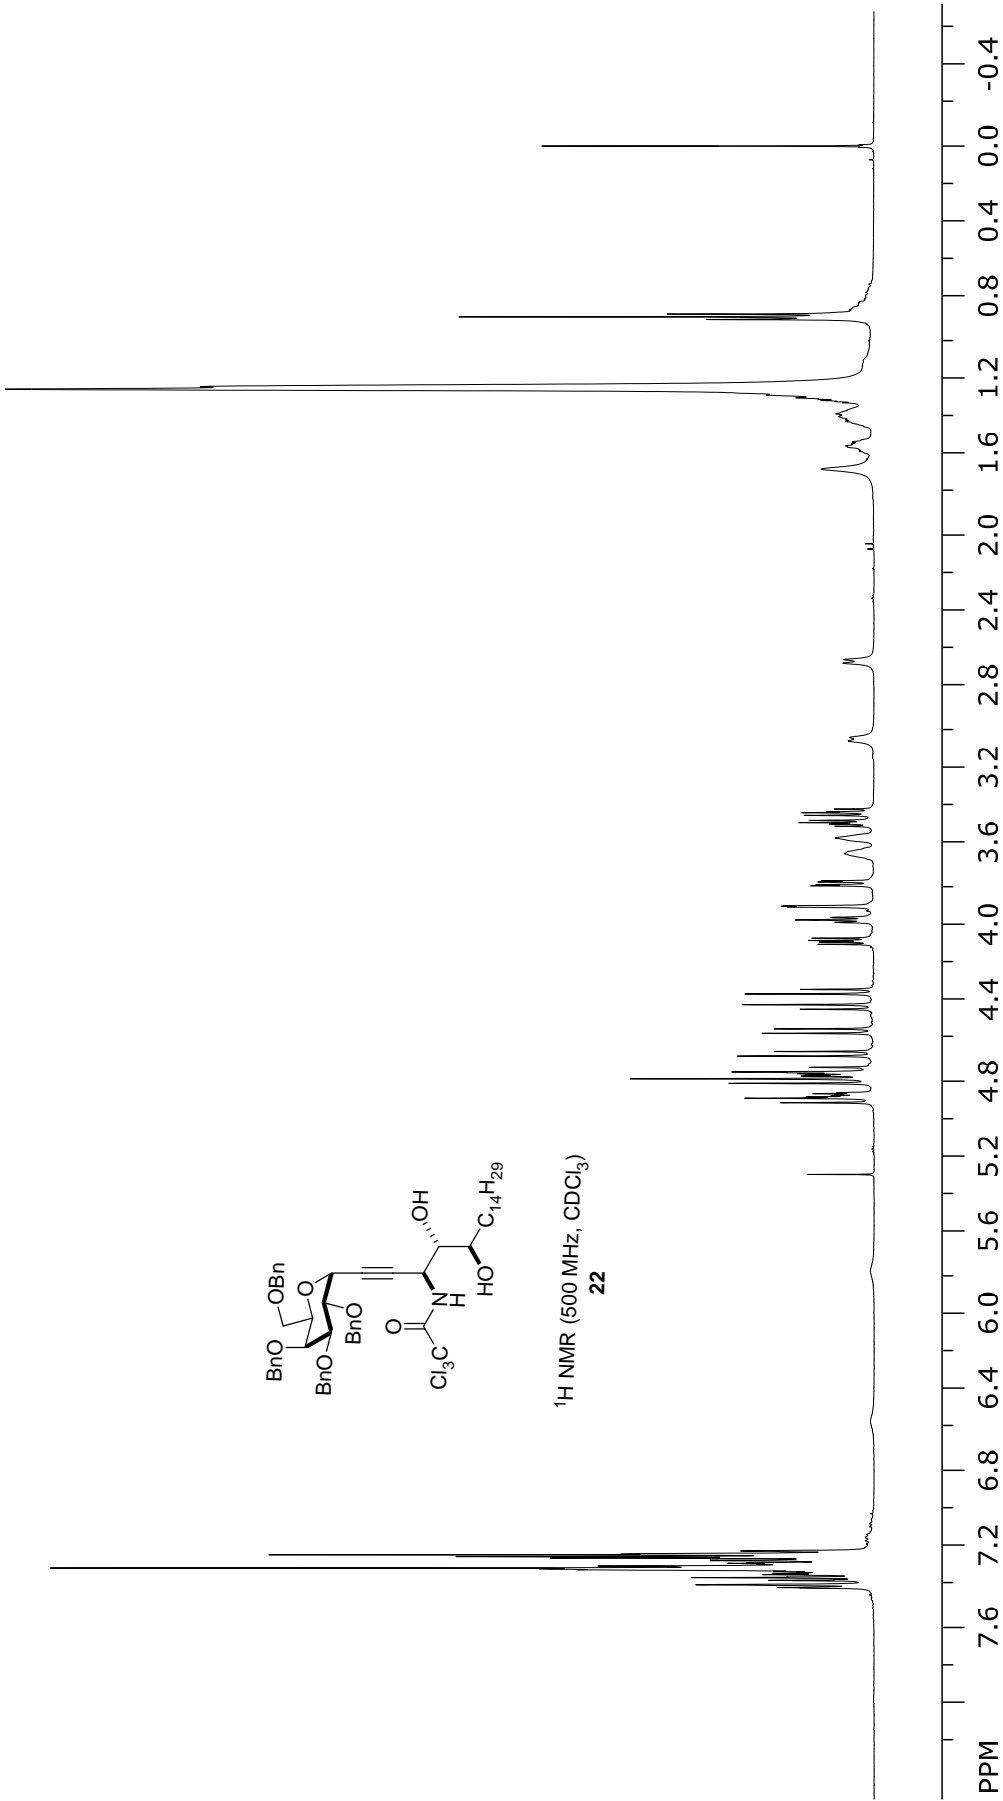

file: ... \NMR 500 3-1-2010\zh091203s4\1\fid exp: <zg30> freq. of 0 ppm: 500.130014 MHz  
 transmitter freq.: 500.133089 MHz processed size: 32768 complex points  
 time domain size: 65536 points LB: 0.300 GF: 0.0000  
 width: 10330.58 Hz = 20.6557 ppm = 0.157632 Hz/pt Hz/cm: 192.028 ppm/cm: 0.38395  
 number of scans: 16

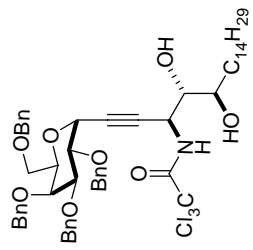

<sup>13</sup>C NMR (125 MHz, CDCl<sub>3</sub>)  
22

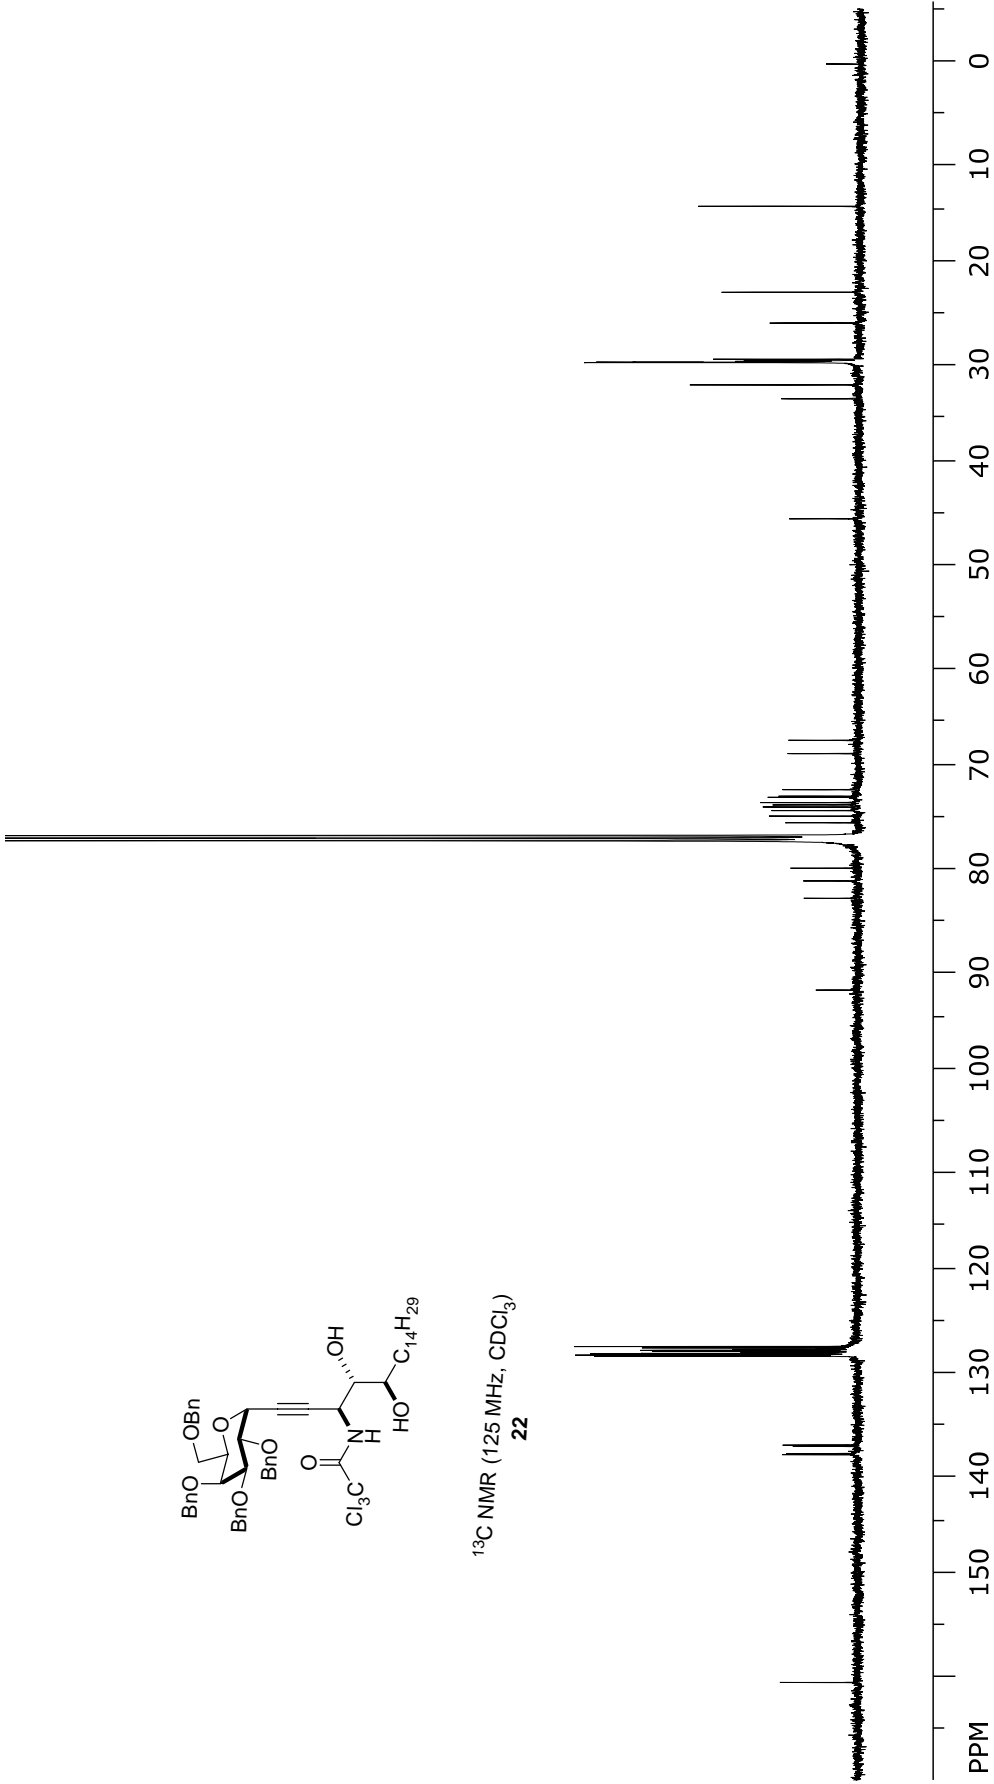

file: ...\\NMR 500 3-1-2010\zh091203s4\2\fid exp: <zpgg30>  
 transmitter freq.: 125.771622 MHz  
 time domain size: 65536 points  
 width: 31250.00 Hz = 248.4662 ppm = 0.476837 Hz/pt  
 number of scans: 8192

freq. of 0 ppm: 125.757796 MHz  
 processed size: 32768 complex points  
 LB: 1.000 GF: 0.0000  
 Hz/cm: 923.331 ppm/cm: 7.34133

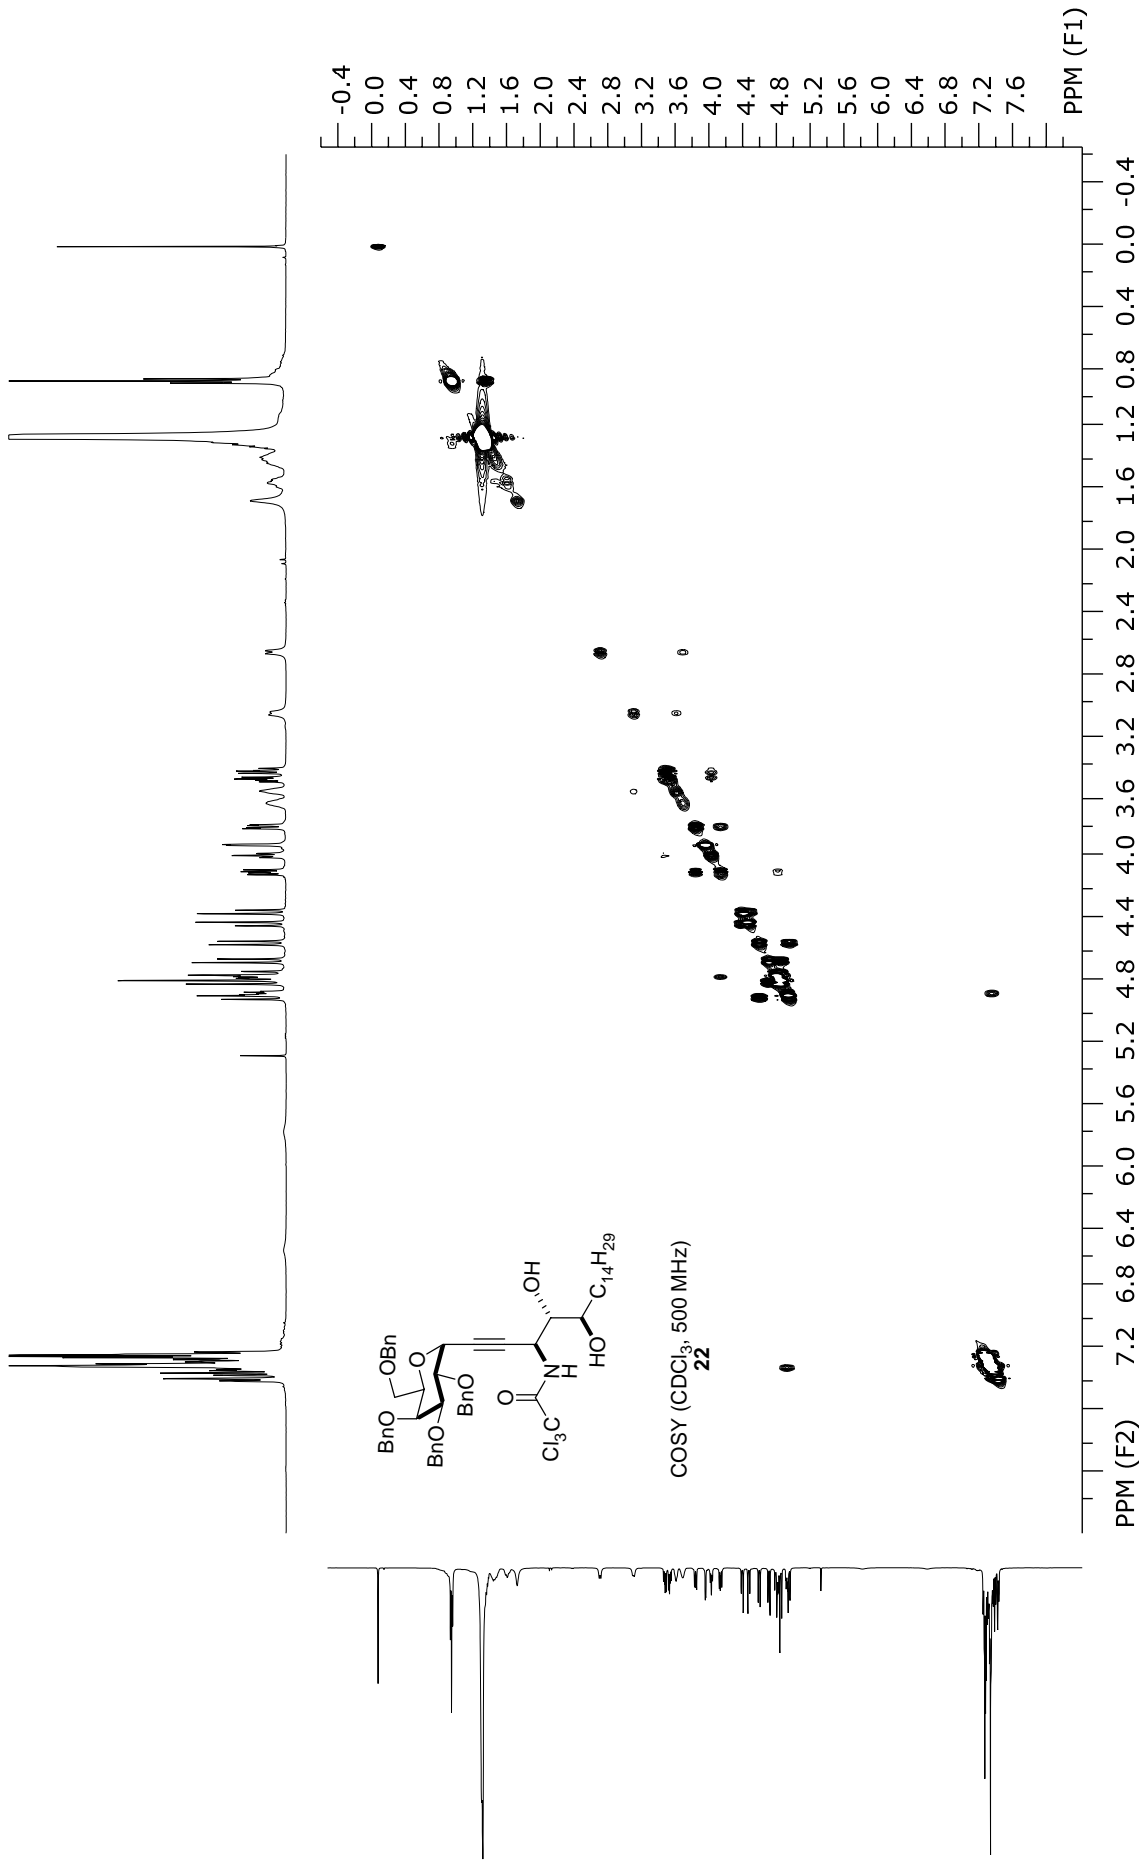

file: ... \NMR 500 3-1-2010\zh091203s4\3ser  
 expt: <cosyppqf>  
 transmitter freq: 500.131970 MHz  
 time domain size: 2048 by 128 points  
 width (F2): 4518.07 Hz = 9.0338 ppm = 2.2061 Hz/pt  
 number of scans: 16  
 F2: freq. of 0 ppm: 500.1300139 MHz  
 processed size: 1024 complex points  
 window function: Sine  
 shift: 0.0 degrees  
 Hz/cm: 225.904 ppm/cm: 0.45169  
 F1: freq. of 0 ppm: 500.1300139 MHz  
 processed size: 1024 complex points  
 window function: Sine  
 shift: 0.0 degrees  
 Hz/cm: 410.733 ppm/cm: 0.82125

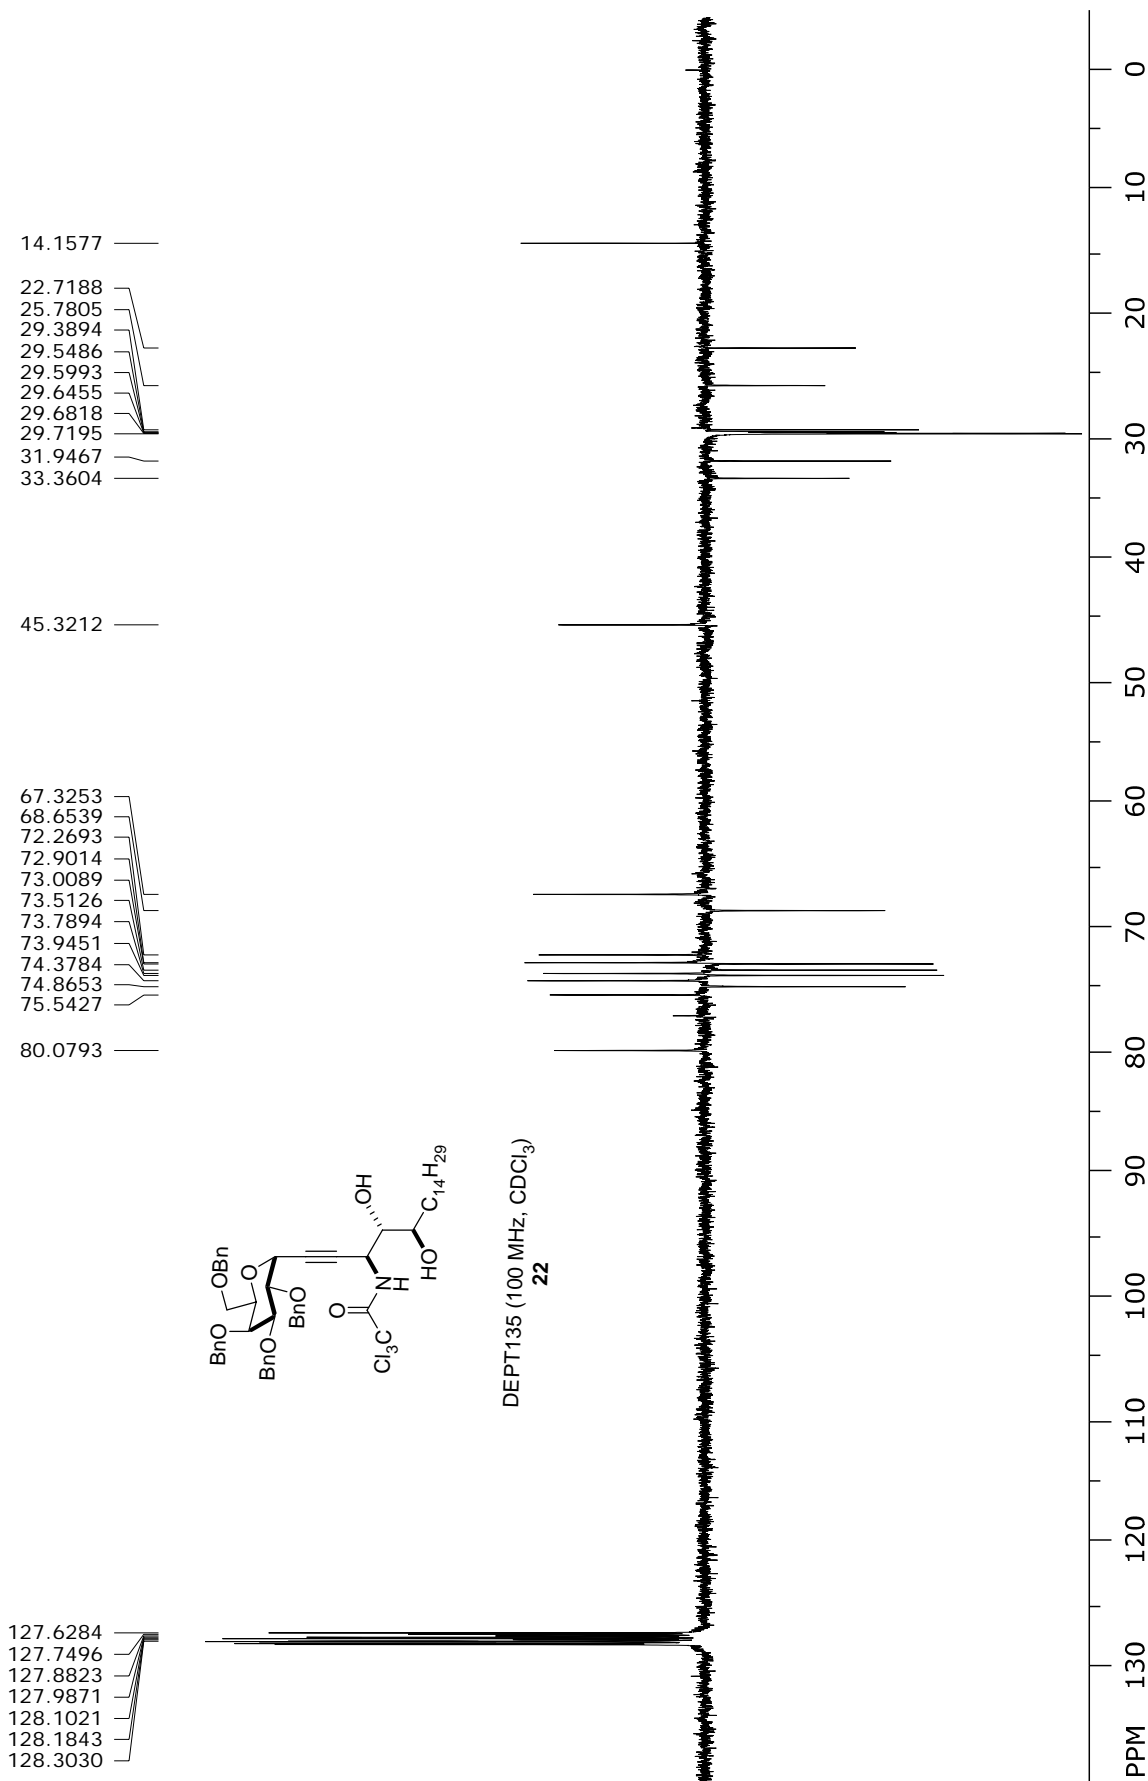

file: ...500 3-1-2010\zh091203s4-400\10\fid expt: <dept135>  
 transmitter freq.: 100.622830 MHz  
 time domain size: 65536 points  
 width: 23980.82 Hz = 238.3238 ppm = 0.365918 Hz/pt  
 number of scans: 4096

freq. of 0 ppm: 100.612769 MHz  
 processed size: 32768 complex points  
 LB: 1.000 GF: 0.0000  
 Hz/cm: 604.641 ppm/cm: 6.00898





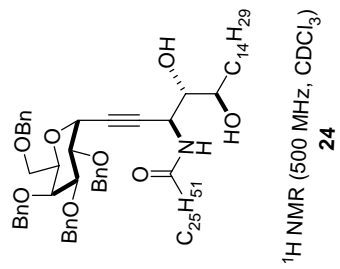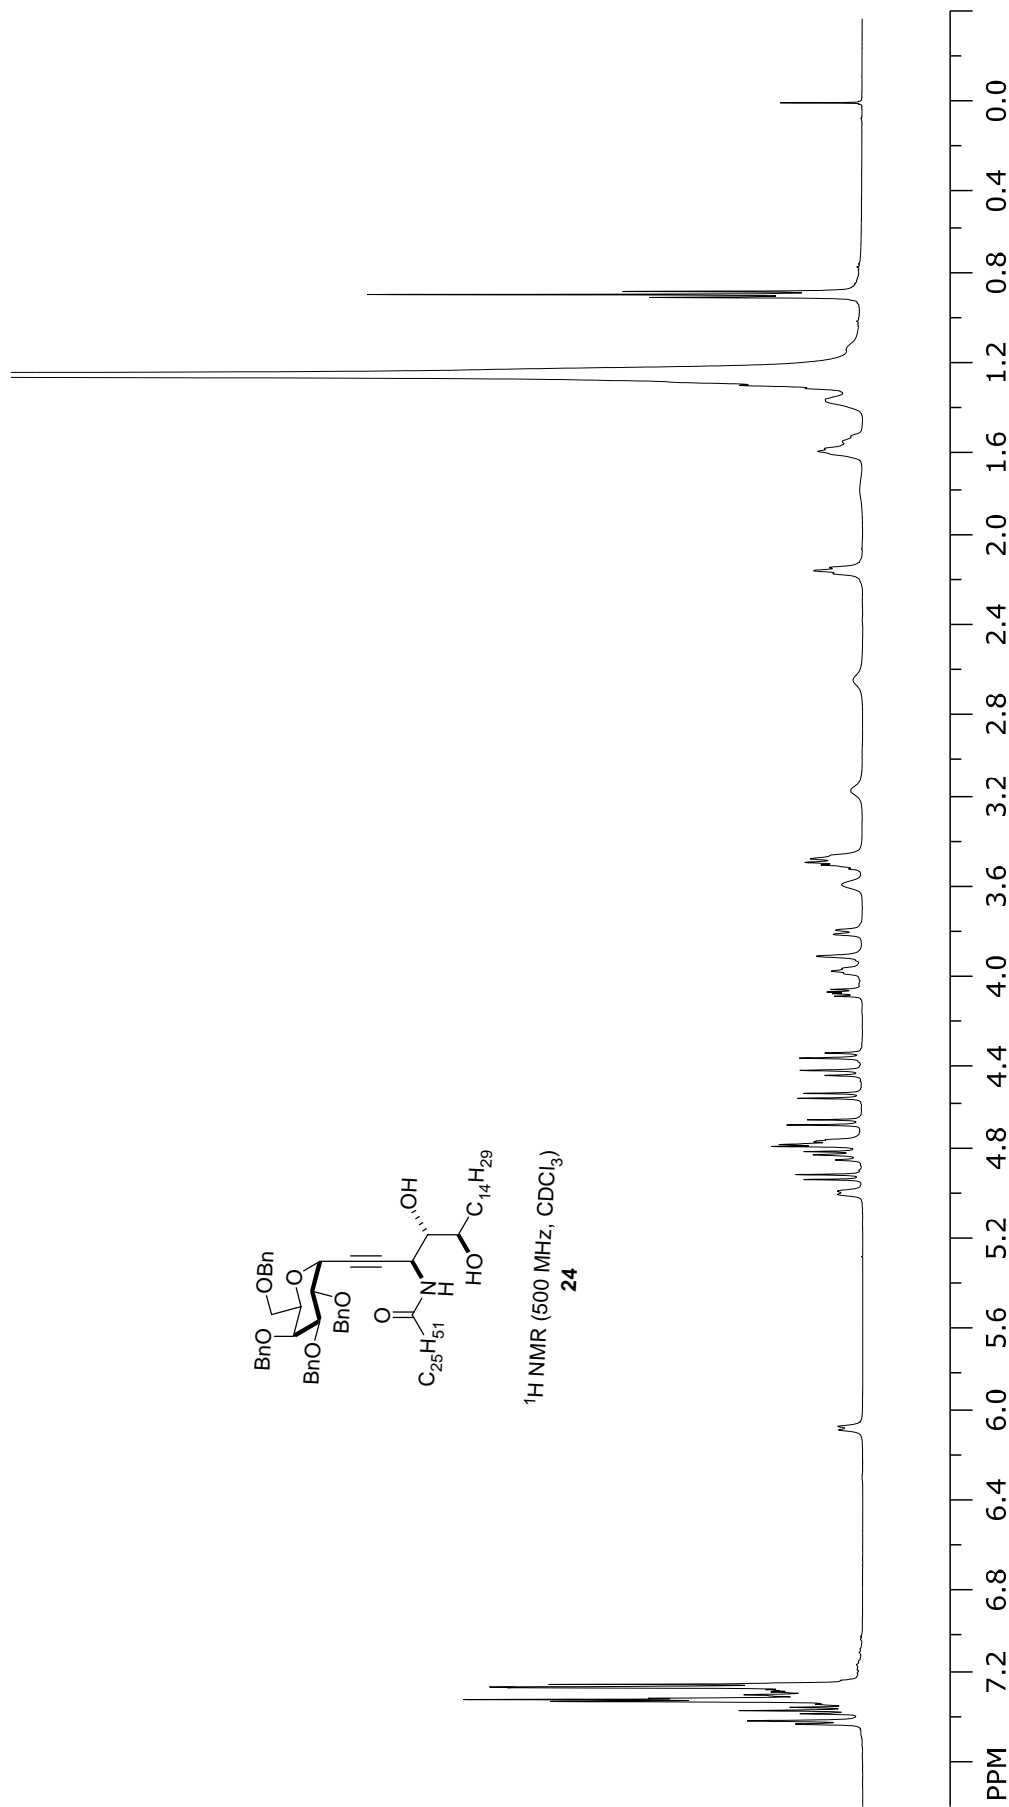

file: ...\\NMR 500 3-1-1-2010\zh100308s2\1\fid exp: <zg30>  
 transmitter freq.: 500.133089 MHz  
 time domain size: 65536 points  
 width: 10330.58 Hz = 20.6557 ppm = 0.157632 Hz/pt  
 number of scans: 16

freq. of 0 ppm: 500.130016 MHz  
 processed size: 32768 complex points  
 LB: 0.300 GF: 0.0000  
 Hz/cm: 170.944 ppm/cm: 0.34180

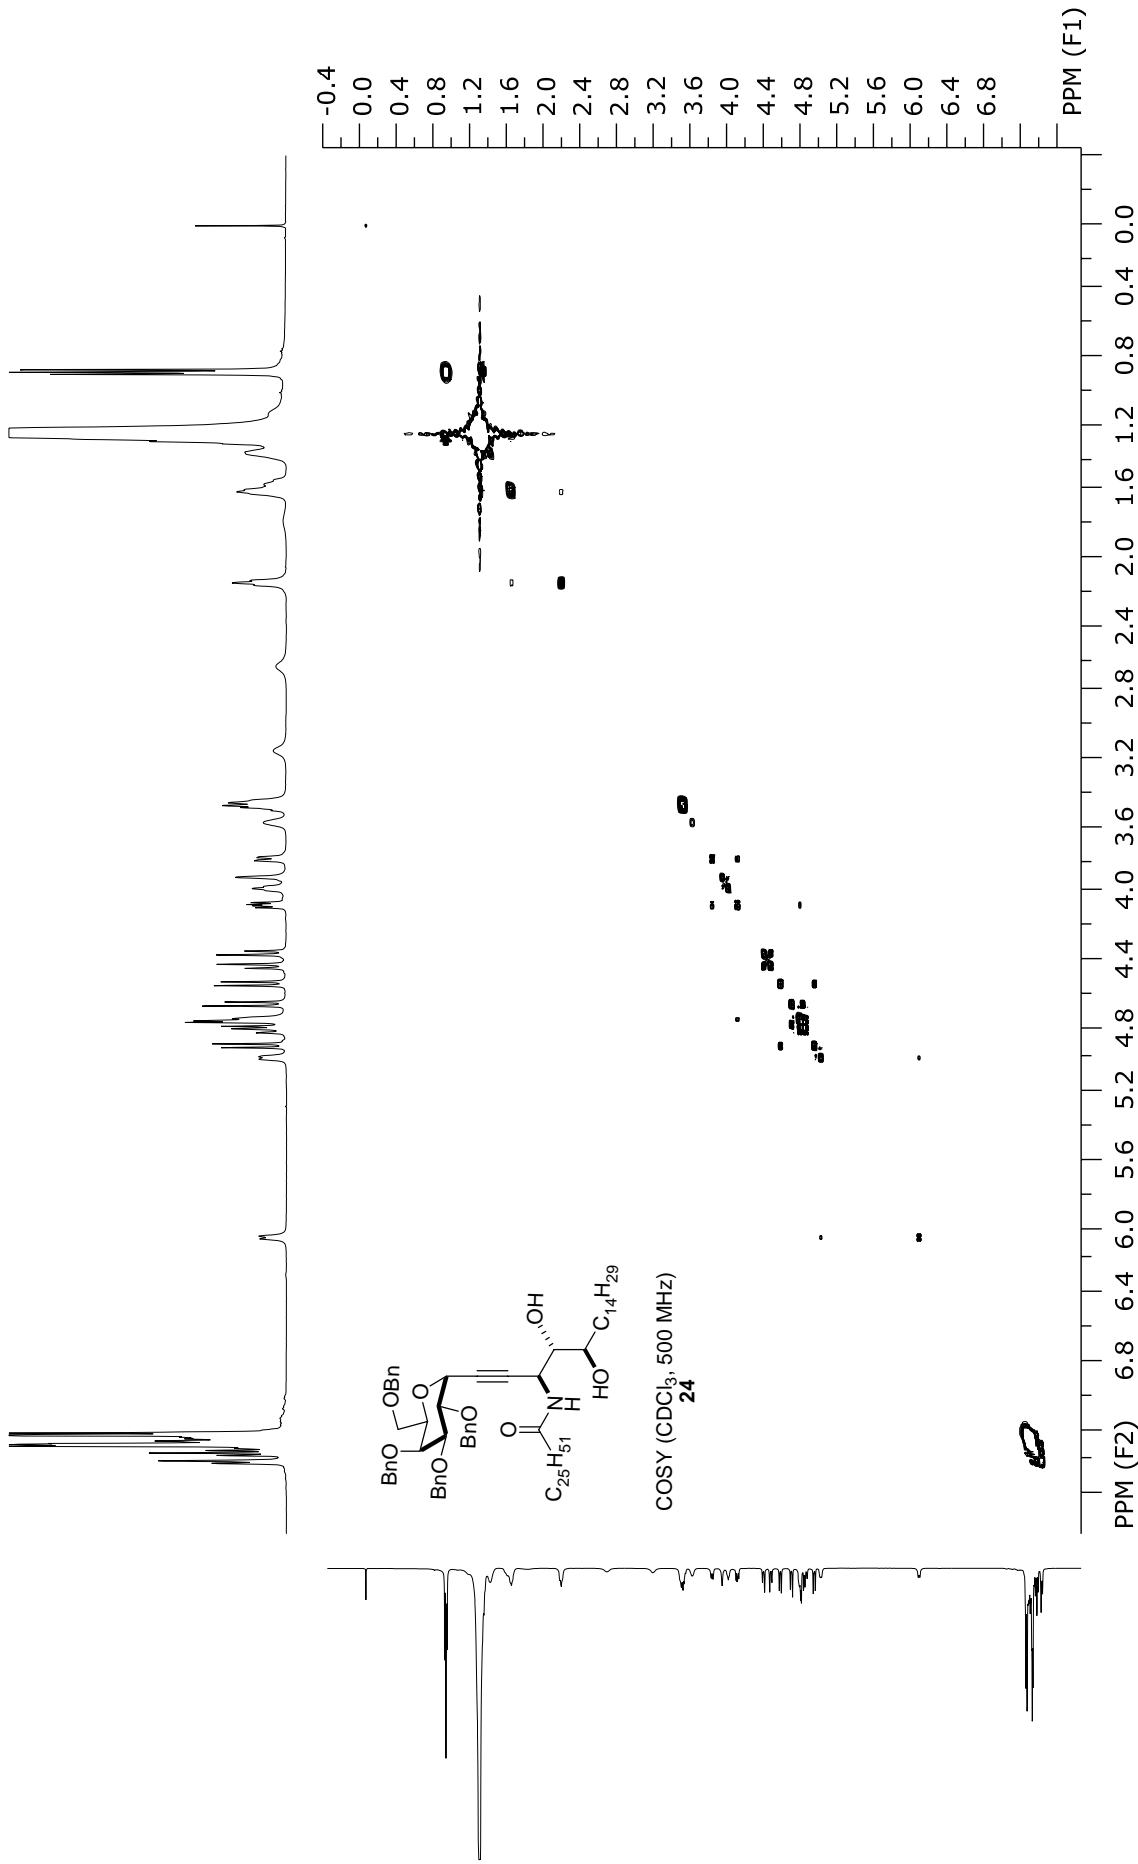

file: ...\\NMR 500 3-1-2010\\zh100308s2\\ser  
 exp: <cosygpqf>  
 transmitter freq: 500.131875 MHz  
 time domain size: 2048 by 128 points  
 width (F2): 4145.94 Hz = 8.2897 ppm = 2.0244 Hz/pt  
 number of scans: 8

F2: freq: of 0 ppm: 500.1300161 MHz  
 processed size: 1024 complex points  
 window function: Sine  
 shift: 0.0 degrees  
 Hz/cm: 207.297 ppm/cm: 0.41448

F1: freq: of 0 ppm: 500.1300161 MHz  
 processed size: 1024 complex points  
 window function: Sine  
 shift: 0.0 degrees  
 Hz/cm: 376.904 ppm/cm: 0.75361

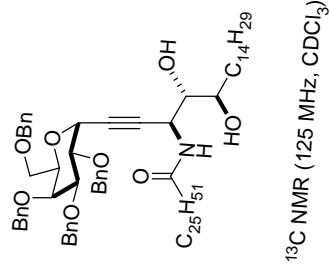

24

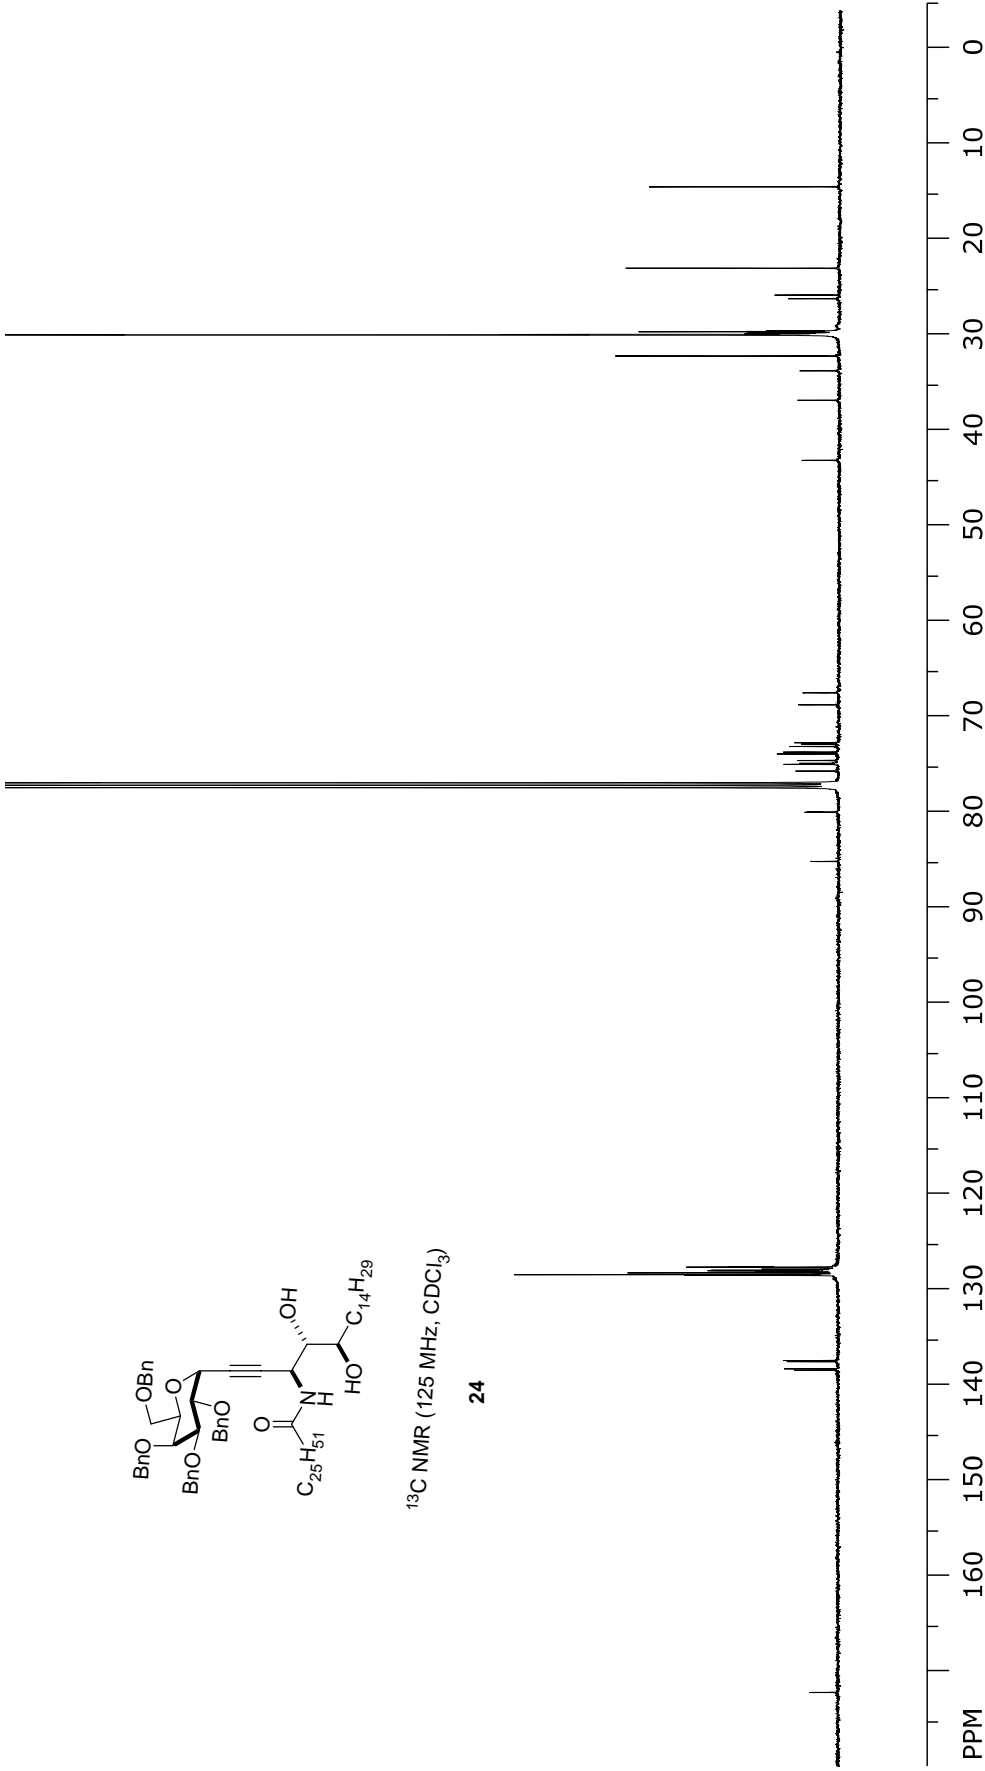

file: ... \NMR 500 3-1-2010\zh100308s2\3\fid expt: <z9pg30>  
 transmitter freq.: 125.771622 MHz  
 time domain size: 65536 points  
 width: 31250.00 Hz = 248.4662 ppm = 0.476837 Hz/pt  
 number of scans: 8192

freq. of 0 ppm: 125.757798 MHz  
 processed size: 32768 complex points  
 LB: 1.000 GF: 0.0000  
 Hz/cm: 966.505 ppm/cm: 7.68460

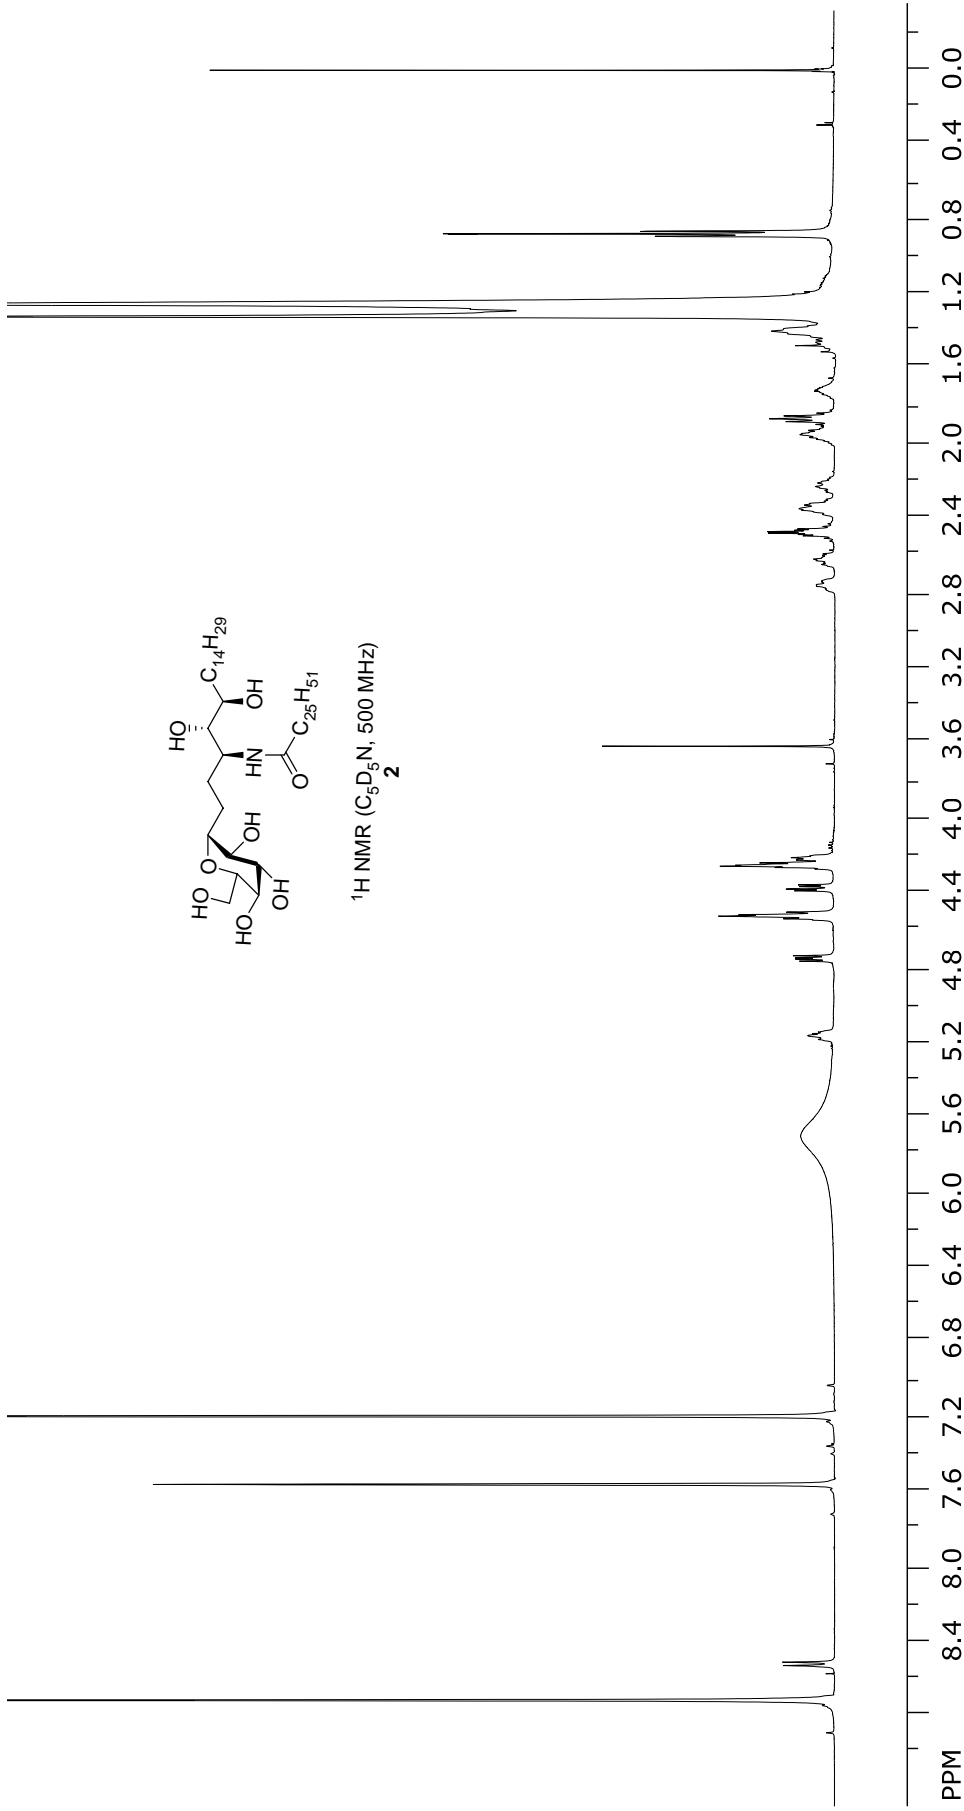

file: ... \NMR 500 3-1-2010\zh100315s2\2\fid exp: <zg30>  
 transmitter freq.: 500.133089 MHz  
 time domain size: 65536 points  
 width: 10330.58 Hz = 20.6557 ppm = 0.157632 Hz/pt  
 number of scans: 16

freq. of 0 ppm: 500.130741 MHz  
 processed size: 32768 complex points  
 LB: 0.300 GF: 0.0000  
 Hz/cm: 192.754 ppm/cm: 0.38541

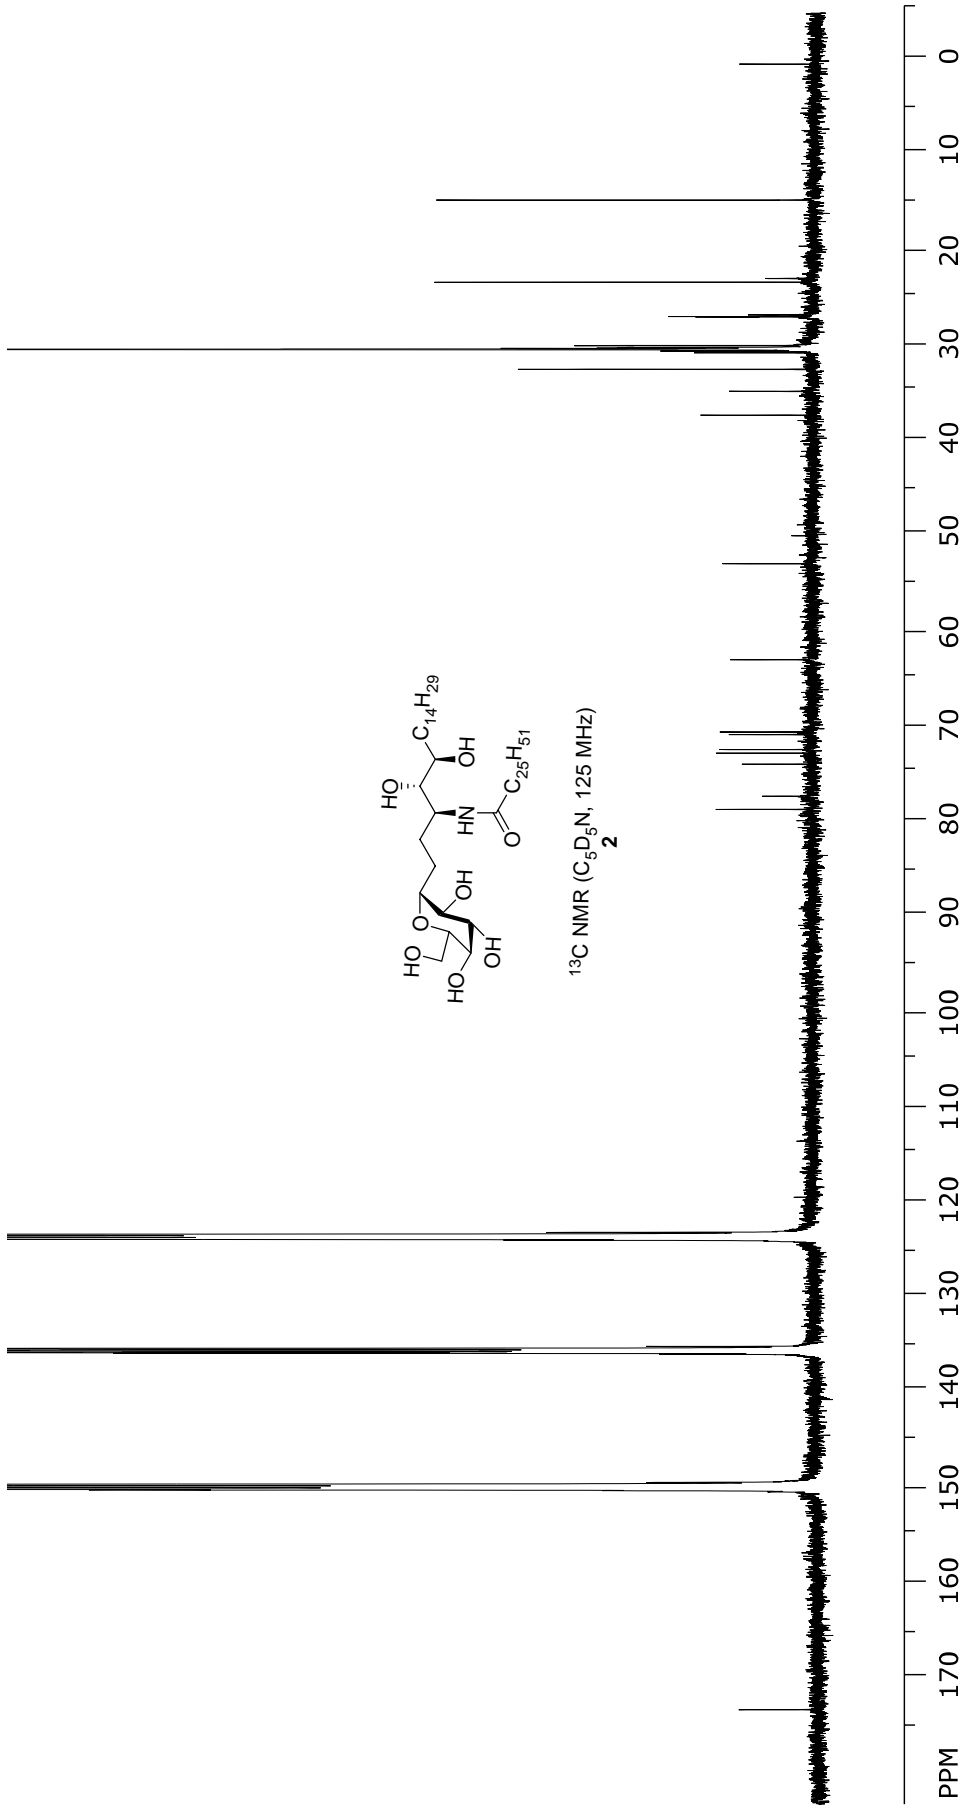

file: ...\\NMR 500 3-1-2010\\zh100315s2\\4\\fid expt: <zpgp30>  
 transmitter freq.: 125.771622 MHz  
 time domain size: 65536 points  
 width: 31250.00 Hz = 248.4662 ppm = 0.476837 Hz/pt  
 number of scans: 24576

freq. of 0 ppm: 125.757892 MHz  
 processed size: 32768 complex points  
 LB: 1.000 GF: 0.0000  
 Hz/cm: 949.510 ppm/cm: 7.54948

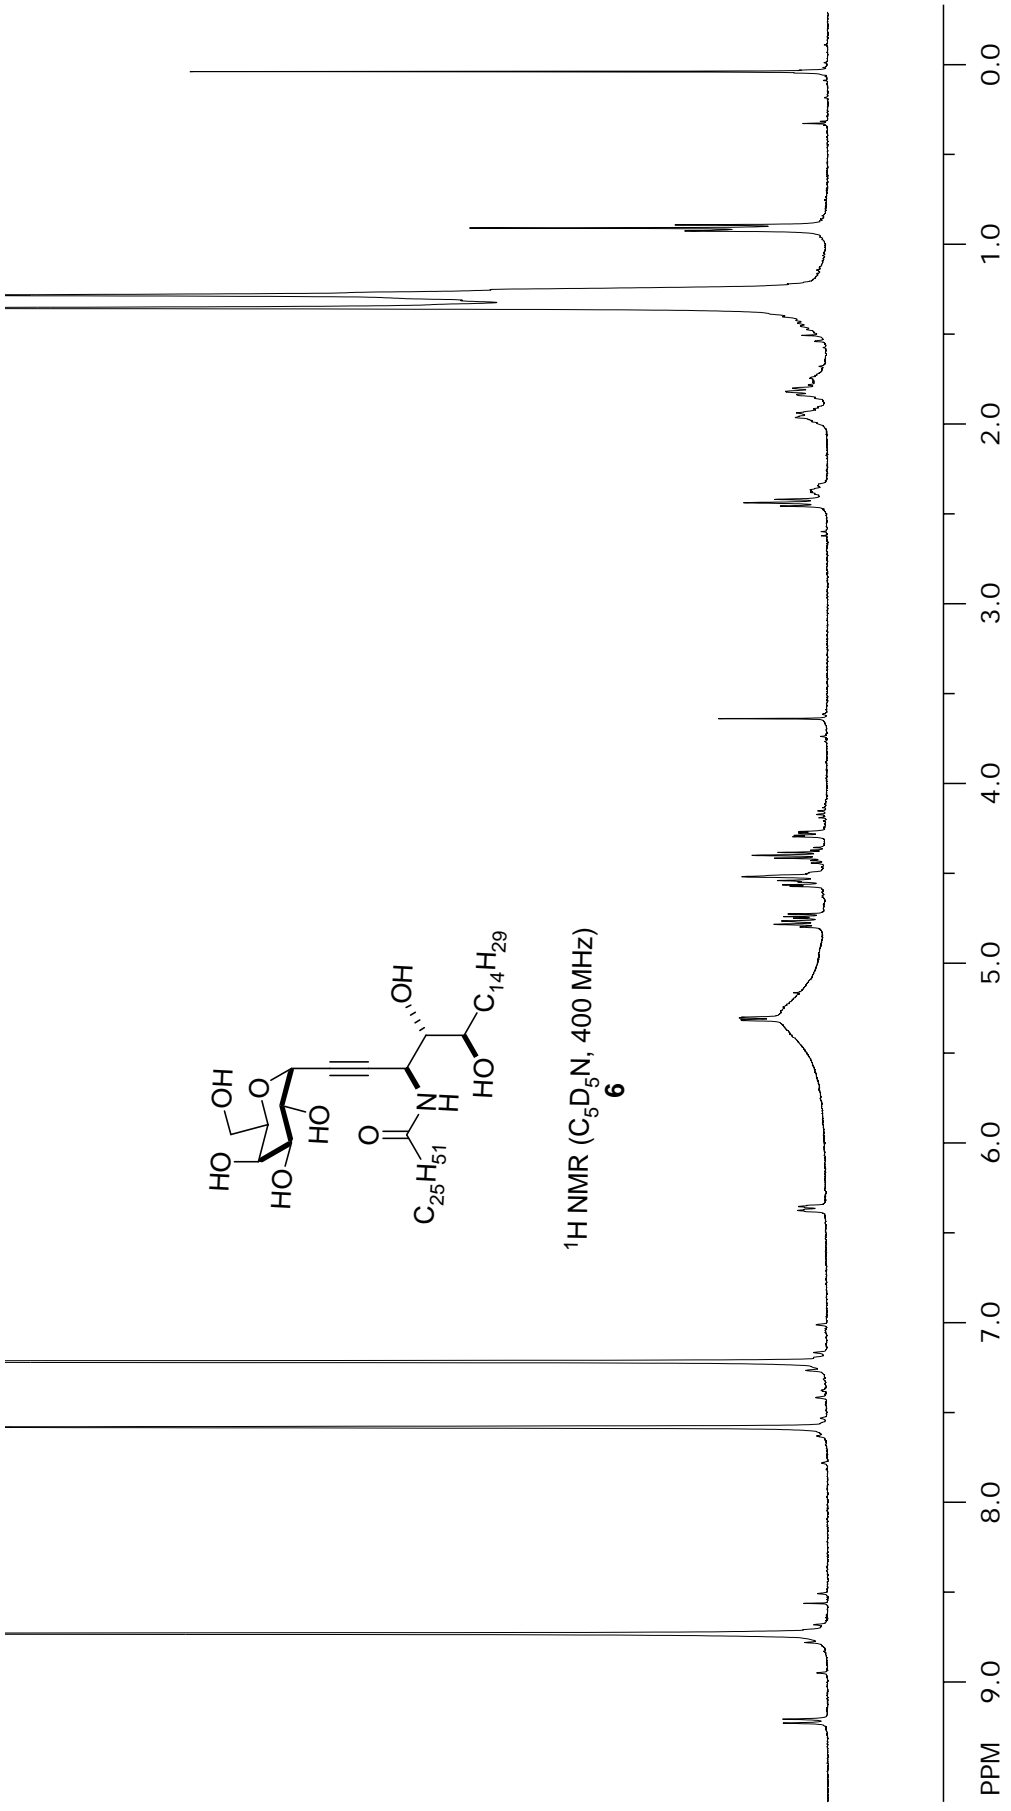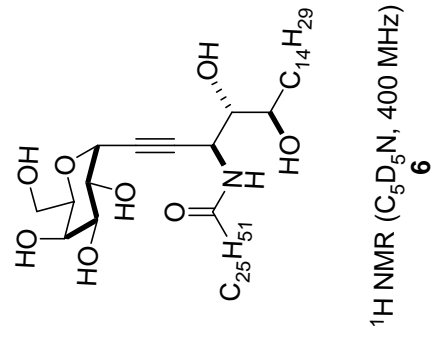

$^1H$  NMR ( $C_5D_5N$ , 400 MHz)

file: ... \NMR 400 3-13-10\zh100310s2\10\fid exp: <zg30>  
transmitter freq.: 400.132471 MHz  
time domain size: 65536 points  
width: 8278.15 Hz = 20.6885 ppm = 0.126314 Hz/pt  
number of scans: 16

freq. of 0 ppm: 400.129987 MHz  
processed size: 32768 complex points  
LB: 0.300 GF: 0.0000  
Hz/cm: 166.873 ppm/cm: 0.41704

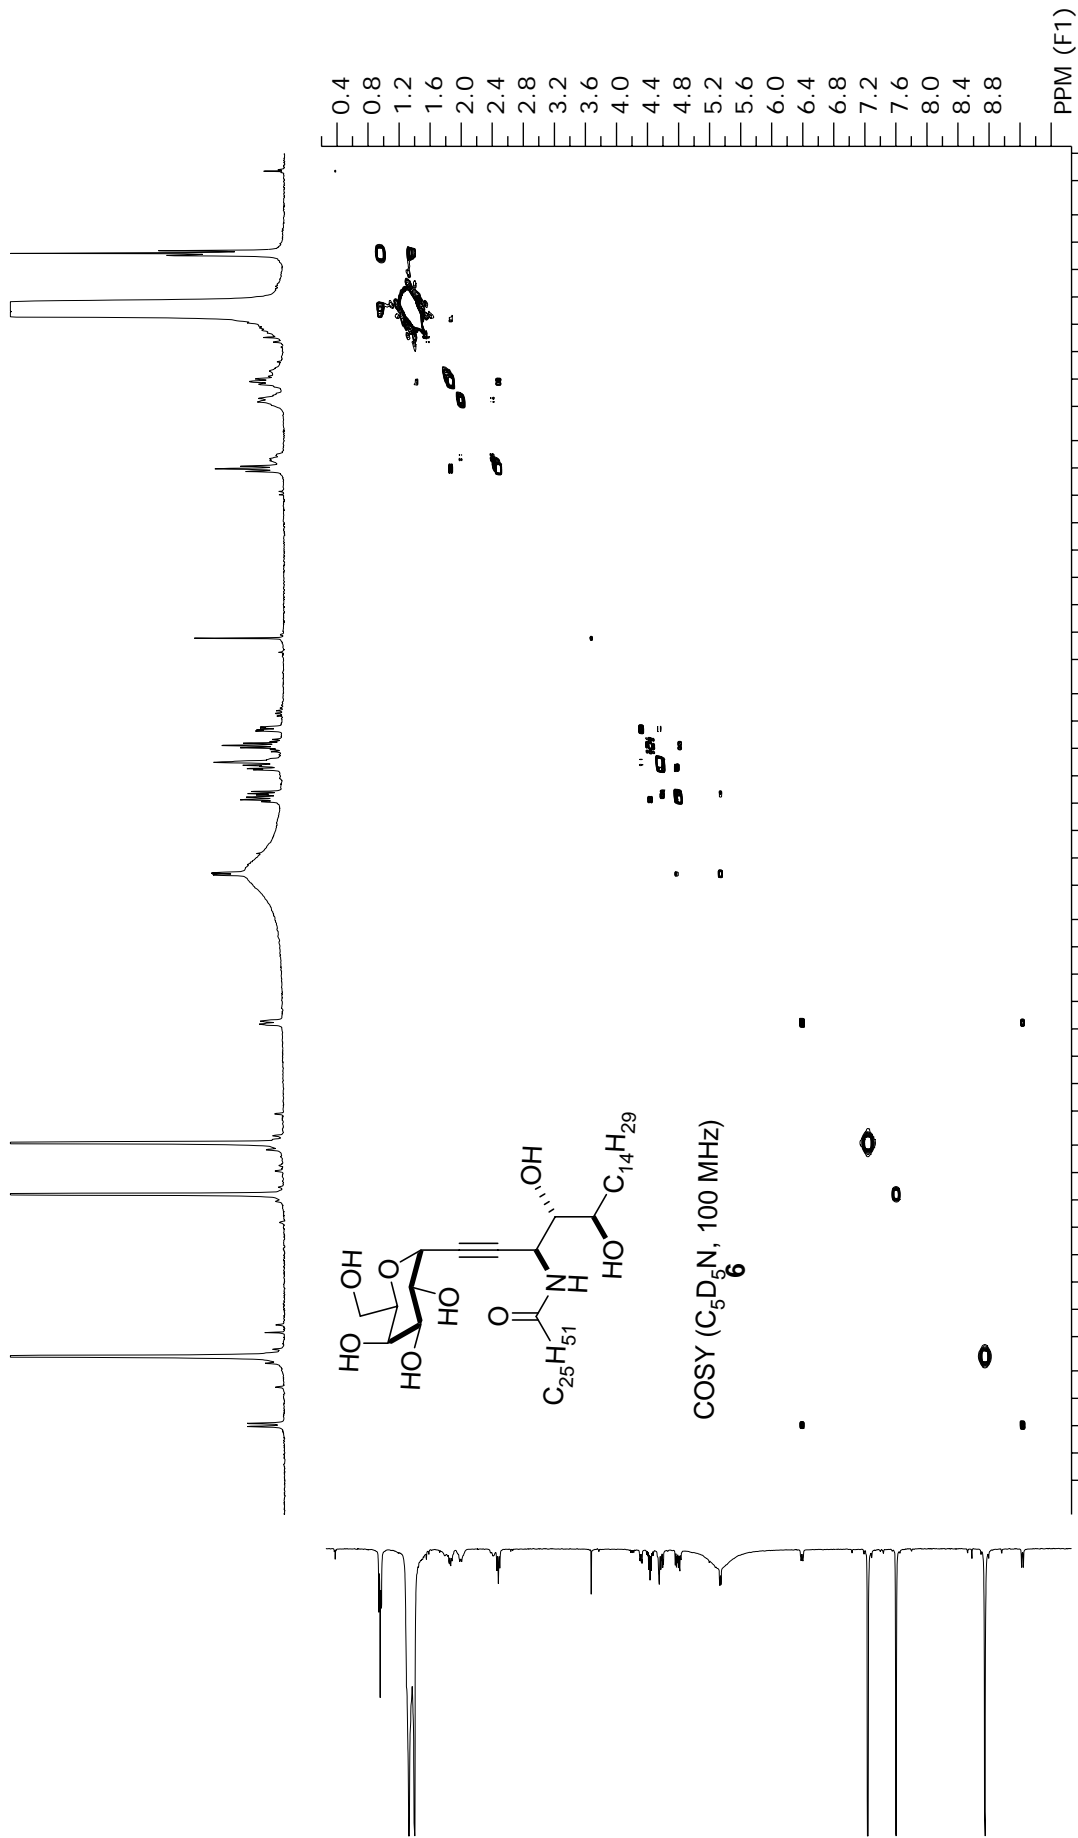

file: ... \NMR 400 3-13-10\zh100310s2\11\ser  
 expt: <cosyqf45>  
 transmitter freq: 400.131993 MHz  
 time domain size: 2048 by 128 points  
 width (F2): 3881.99 Hz = 9.7018 ppm = 1.8955 Hz/pt  
 number of scans: 16

F1: freq. of 0 ppm: 400.1299870 MHz  
 processed size: 1024 complex points  
 window function: Sine  
 shift: 0.0 degrees  
 Hz/cm: 352.908 ppm/cm: 0.88198

F2: freq. of 0 ppm: 400.1299870 MHz  
 processed size: 1024 complex points  
 window function: Sine  
 shift: 0.0 degrees  
 Hz/cm: 194.099 ppm/cm: 0.48509

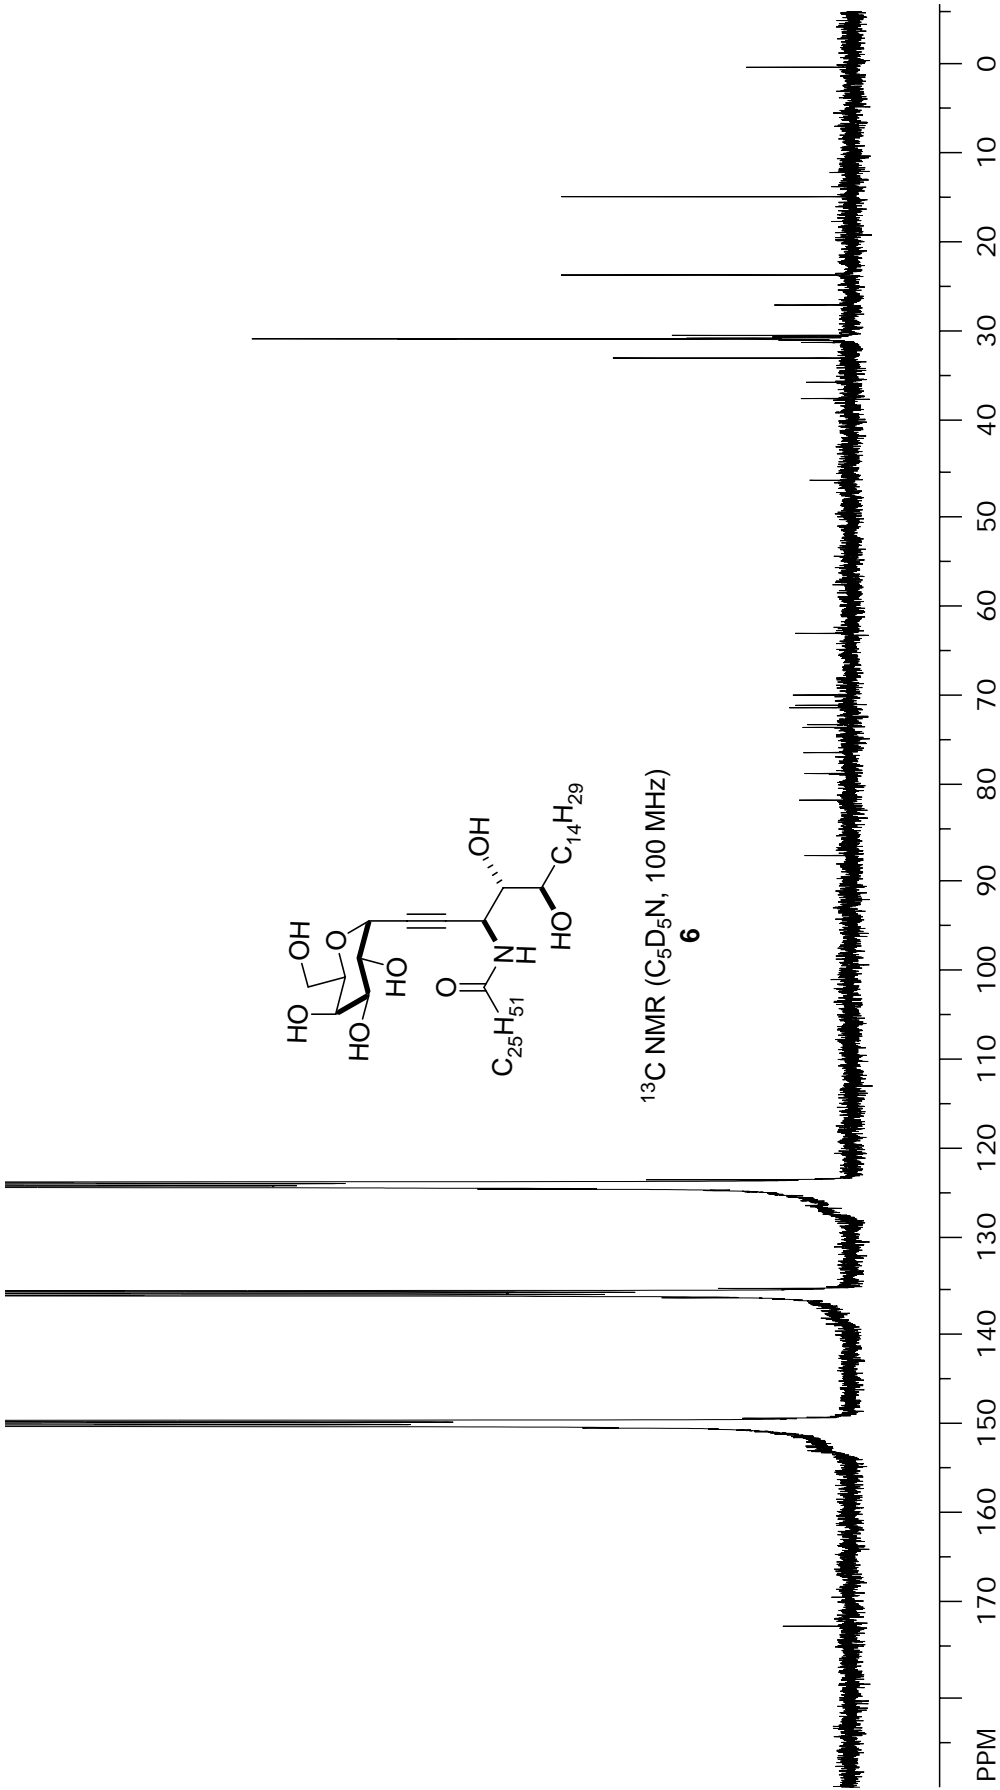

file: ... \NMR 400 3-13-10\zh100310s2\12\fid exp: <z9pg30>  
 transmitter freq.: 100.622830 MHz  
 time domain size: 65536 points  
 width: 23980.82 Hz = 238.3238 ppm = 0.365918 Hz/pt  
 number of scans: 16384

freq. of 0 ppm: 100.612699 MHz  
 processed size: 32768 complex points  
 LB: 1.000 GF: 0.0000  
 Hz/cm: 823.004 ppm/cm: 8.17910



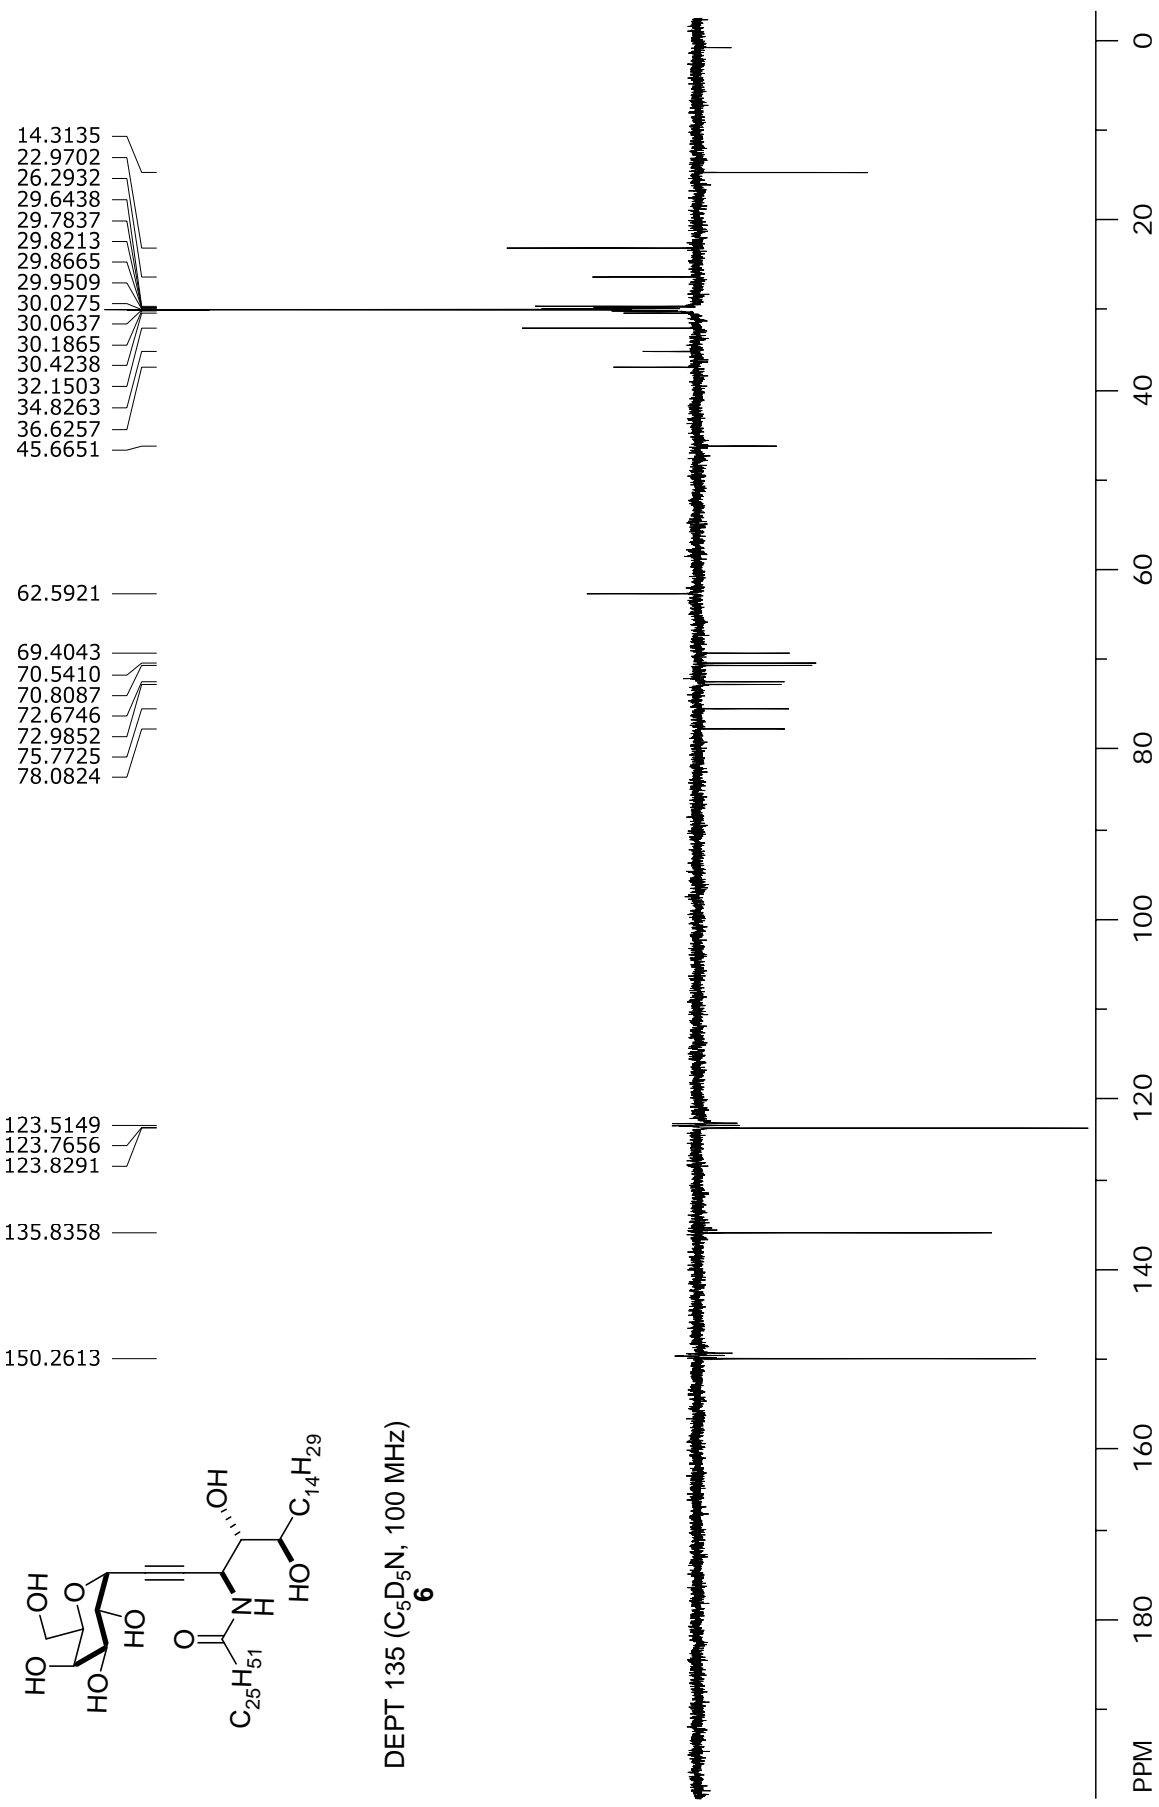

file: ... \NMR 400 3-13-10\zh100310s2\13\fid exp: <dept135>  
 transmitter freq.: 100.622830 MHz  
 time domain size: 65536 points  
 width: 23980.82 Hz = 238.3238 ppm = 0.365918 Hz/pt  
 number of scans: 16384

freq. of 0 ppm: 100.612858 MHz  
 processed size: 32768 complex points  
 LB: 1.000 GF: 0.0000  
 Hz/cm: 855.382 ppm/cm: 8.50087
